# Supplementary material for: Transcriptome Assembly and Analysis of Tibetan Hulless Barley (Hordeum vulgare L. var. nudum) Developing Grains, with Emphasis on Quality Properties
Source: PLoS One. 2014 May 28;9(5):e98144. doi: 10.1371/journal.pone.0098144 (PMC4037191; doi:10.1371/journal.pone.0098144)
Supplement: Table S2 — List of genes related to seed quality. (XLSX) [file pone.0098144.s013.xlsx]

## Sheet: Sheet1
Table S2 List of genes related to seed quality.
geneID	Family	Gene Name	geneLength	XQ754_RPKM	Nimubai_RPKM	log2(Nimubai_RPKM/XQ754_RPKM)	up/down	pvalue	FDR	Nr-ID	Nr-Score	Nr-Evalue	Nr-annotation	Swissprot-ID	Swissprot-Score	Swissprot-Evalue	Swissprot-annotation	COG-Protein-or-Domain	COG-Score	COG-Evalue	COG-ID	COG-Function-Description	KO_id	KEGG-Evalue	KEGG-Score	KEGG-Gene	ko_definition	GO-BiologicalProcess	GO-MolecularFunction	Go-CellularComponent
Unigene35843_All	asparagine biosynthesis I	amino acid catabolism	263	51.148	12.9021	-1.9871	Down	3.2309e-13	7.6793e-12	gi|13925886|gb|AAK49456.1|AF307145_1	142	1e-33	glutamine-dependent asparagine synthetase 1 [Hordeum vulgare subsp. vulgare]	sp|P49092|ASNS1_LOTJA	128	1e-29	Asparagine synthetase [glutamine-hydrolyzing] 1 OS=Lotus japonicus GN=AS1 PE=2 SV=2	asnB	69.7	1e-12	COG0367	Asparagine synthase (glutamine-hydrolyzing)	K01953	4e-31	130	vvi:100241610	asparagine synthase (glutamine-hydrolysing) [EC:6.3.5.4]	GO:0009064//glutamine family amino acid metabolic process;GO:0006528//asparagine metabolic process	GO:0016884//carbon-nitrogen ligase activity, with glutamine as amido-N-donor;GO:0032559//adenyl ribonucleotide binding	-
Unigene22758_All	asparagine biosynthesis II	L-3-cyanoalanine synthase activity	1445	54.5491	20.0442	-1.4444	Down	2.456e-45	2.4213e-43	gi|295917896|gb|ADG60235.1|	716	0	beta-cyanoalanine synthase [Hordeum vulgare]	sp|P32260|CYSKP_SPIOL	427	1e-118	Cysteine synthase, chloroplastic/chromoplastic OS=Spinacia oleracea GN=CYSK PE=1 SV=2	slr1842	347	3e-95	COG0031	Cysteine synthase	K13034	1e-175	613	osa:4335048	L-3-cyanoalanine synthase/ cysteine synthase [EC:2.5.1.47 4.4.1.9]	GO:0006563//L-serine metabolic process;GO:0000097//sulfur amino acid biosynthetic process	GO:0016835//carbon-oxygen lyase activity;GO:0048037//cofactor binding;GO:0016846//carbon-sulfur lyase activity	-
Unigene26001_All	aspartate biosynthesis and degradation II + asparagine biosynthesis I and degradation I	aspartate transaminase	544	22.1249	0	-14.4334	Down	7.7141e-31	4.8453e-29	gi|195636088|gb|ACG37512.1|	141	4e-33	aspartate aminotransferase [Zea mays]	sp|Q9SIE1|PAT_ARATH	106	1e-22	Bifunctional aspartate aminotransferase and glutamate/aspartate-prephenate aminotransferase OS=Arabidopsis thaliana GN=PAT PE=1 SV=2	RP091	55.5	5e-08	COG0436	Aspartate/tyrosine/aromatic aminotransferase	--	--	--	--	--	-	-	-
Unigene28518_All	aspartate biosynthesis and degradation II + asparagine biosynthesis I and degradation I	aspartate transaminase	1512	79.6027	25.2474	-1.6567	Down	4.2662e-83	7.6471e-81	gi|115479507|ref|NP_001063347.1|	788	0	Os09g0453800 [Oryza sativa Japonica Group] >gi|113631580|dbj|BAF25261.1| Os09g0453800 [Oryza sativa Japonica Group] >gi|122936799|tpd|FAA00314.1| TPA: aminotransferase [Oryza sativa Japonica Group]	sp|P77806|YBDL_ECOLI	296	4e-79	Aminotransferase YbdL OS=Escherichia coli (strain K12) GN=ybdL PE=1 SV=1	Rv0858c	318	2e-86	COG0436	Aspartate/tyrosine/aromatic aminotransferase	K00815	4e-33	140	zma:100193424	tyrosine aminotransferase [EC:2.6.1.5]	GO:0008152//metabolic process	GO:0016846//carbon-sulfur lyase activity;GO:0048037//cofactor binding;GO:0008483//transaminase activity	GO:0043231//intracellular membrane-bounded organelle
Unigene13632_All	aspartate biosynthesis and degradation II + asparagine biosynthesis I and degradation I	aspartate transaminase	571	10.9526	4.0325	-1.4415	Down	8.1247e-05	0.00054773	gi|115468452|ref|NP_001057825.1|	172	2e-42	Os06g0548000 [Oryza sativa Japonica Group] >gi|113595865|dbj|BAF19739.1| Os06g0548000 [Oryza sativa Japonica Group]	sp|P46643|AAT1_ARATH	162	1e-39	Aspartate aminotransferase, mitochondrial OS=Arabidopsis thaliana GN=ASP1 PE=1 SV=1	SPBC725.01	108	8e-24	COG1448	Aspartate/tyrosine/aromatic aminotransferase	K00813	1e-45	179	zma:100274119	aspartate aminotransferase [EC:2.6.1.1]	-	-	-
Unigene22443_All	aspartate biosynthesis and degradation II + asparagine biosynthesis I and degradation I	aspartate transaminase activity	1211	54.3712	20.9151	-1.3783	Down	1.1716e-35	8.6677e-34	gi|115451309|ref|NP_001049255.1|	537	1e-151	Os03g0195100 [Oryza sativa Japonica Group] >gi|113547726|dbj|BAF11169.1| Os03g0195100 [Oryza sativa Japonica Group]	sp|Q93ZN9|DAPAT_ARATH	412	2e-114	LL-diaminopimelate aminotransferase, chloroplastic OS=Arabidopsis thaliana GN=DAP PE=1 SV=1	MTH52	251	1e-66	COG0436	Aspartate/tyrosine/aromatic aminotransferase	K10206	9e-153	537	osa:4331930	LL-diaminopimelate aminotransferase [EC:2.6.1.83]	-	-	-
Unigene28600_All	aspartate degradation II	malate dehydrogenase	432	126.194	5.0495	-4.6434	Down	2.5906e-110	6.119e-108	gi|224760833|gb|ACN62414.1|	112	1e-24	malate dehydrogenase [Bambusa oldhamii]	sp|Q42972|MDHG_ORYSJ	112	6e-25	Malate dehydrogenase, glyoxysomal OS=Oryza sativa subsp. japonica GN=Os12g0632700 PE=1 SV=3	HI1210	58.5	4e-09	COG0039	Malate/lactate dehydrogenases	K00026	9e-27	116	sbi:SORBI_08g022770	malate dehydrogenase [EC:1.1.1.37]	GO:0009060//aerobic respiration;GO:0043648//dicarboxylic acid metabolic process;GO:0006007//glucose catabolic process	GO:0016615//malate dehydrogenase activity	GO:0005777//peroxisome
Unigene23030_All	aspartate degradation II	malate dehydrogenase	673	13.15	1.0804	-3.6054	Down	3.9683e-16	1.1989e-14	gi|159489202|ref|XP_001702586.1|	261	4e-69	malate dehydrogenase [Chlamydomonas reinhardtii] >gi|158280608|gb|EDP06365.1| malate dehydrogenase [Chlamydomonas reinhardtii]	sp|Q42972|MDHG_ORYSJ	253	1e-66	Malate dehydrogenase, glyoxysomal OS=Oryza sativa subsp. japonica GN=Os12g0632700 PE=1 SV=3	SPCC306.08c	226	3e-59	COG0039	Malate/lactate dehydrogenases	K00026	3e-70	261	cre:CHLREDRAFT_126023	malate dehydrogenase [EC:1.1.1.37]	GO:0009060//aerobic respiration;GO:0043648//dicarboxylic acid metabolic process;GO:0006007//glucose catabolic process	GO:0016615//malate dehydrogenase activity	GO:0005777//peroxisome
Unigene9162_All	Hordein	Gamma-gliadin B	980	43.9487	7.0487	-2.6404	Down	1.5485e-54	1.8006e-52	gi|311554233|gb|ADP95508.1|	206	3e-52	75k gamma secalin [Triticum aestivum]	sp|P06659|GDBB_WHEAT	198	6e-50	Gamma-gliadin B OS=Triticum aestivum PE=3 SV=1	STM0960	55.5	1e-07	COG1674	DNA segregation ATPase FtsK/SpoIIIE and related proteins	--	--	--	--	--	-	-	-
Unigene1000_All	isoleucine biosynthesis I	acetolactate synthase	901	6.9411	1.7485	-1.989	Down	7.7283e-07	8.2369e-06	gi|297599573|ref|NP_001047389.2|	348	4e-95	Os02g0608600 [Oryza sativa Japonica Group] >gi|255671076|dbj|BAF09303.2| Os02g0608600 [Oryza sativa Japonica Group]	sp|Q9MS98|ILVH_GALSU	179	2e-44	Acetolactate synthase small subunit OS=Galdieria sulphuraria GN=ilvH PE=3 SV=1	sll0065	179	6e-45	COG0440	Acetolactate synthase, small (regulatory) subunit	K01653	3e-96	348	osa:4329938	acetolactate synthase I/III small subunit [EC:2.2.1.6]	GO:0008652//cellular amino acid biosynthetic process	GO:0031406//carboxylic acid binding;GO:0016744	GO:0009536//plastid
Unigene12870_All	isoleucine biosynthesis I	phosphogluconate dehydratase	1419	20.6228	9.8214	-1.0702	Down	1.0497e-11	2.1677e-10	gi|115477815|ref|NP_001062503.1|	670	0	Os08g0559600 [Oryza sativa Japonica Group] >gi|113624472|dbj|BAF24417.1| Os08g0559600 [Oryza sativa Japonica Group]	sp|Q7UJ69|ILVD_RHOBA	468	6e-131	Dihydroxy-acid dehydratase OS=Rhodopirellula baltica GN=ilvD PE=3 SV=2	SPAC17G8.06c	422	7e-118	COG0129	Dihydroxyacid dehydratase/phosphogluconate dehydratase	K01687	0	670	osa:4346318	dihydroxy-acid dehydratase [EC:4.2.1.9]	GO:0008652//cellular amino acid biosynthetic process;GO:0006549//isoleucine metabolic process;GO:0006573//valine metabolic process	GO:0016836//hydro-lyase activity	GO:0043231//intracellular membrane-bounded organelle
Unigene35984_All	isoleucine degradation I	enoyl-CoA hydratase	345	14.0231	1.7563	-2.9972	Down	4.0219e-08	5.3915e-07	gi|226510010|ref|NP_001148087.1|	210	5e-54	LOC100281695 [Zea mays] >gi|195615714|gb|ACG29687.1| peroxisomal fatty acid beta-oxidation multifunctional protein [Zea mays]	sp|Q8W1L6|MFP_ORYSJ	207	2e-53	Peroxisomal fatty acid beta-oxidation multifunctional protein OS=Oryza sativa subsp. japonica GN=MFP PE=1 SV=2	CC3189_2	81.3	4e-16	COG1250	3-hydroxyacyl-CoA dehydrogenase	K10527	2e-54	207	osa:4328997	enoyl-CoA hydratase/3-hydroxyacyl-CoA dehydrogenase [EC:4.2.1.17 1.1.1.35 1.1.1.211]	GO:0009062//fatty acid catabolic process;GO:0009791//post-embryonic development	GO:0016856;GO:0048037//cofactor binding;GO:0016836//hydro-lyase activity	GO:0042579//microbody;GO:0030312//external encapsulating structure;GO:0009536//plastid
Unigene5416_All	isoleucine degradation I	enoyl-CoA hydratase	1495	14.0494	4.7016	-1.5793	Down	7.5133e-15	2.0575e-13	gi|297610889|ref|NP_001065335.2|	661	0	Os10g0552900 [Oryza sativa Japonica Group] >gi|255679613|dbj|BAF27172.2| Os10g0552900 [Oryza sativa Japonica Group]	sp|Q8RXN4|HIBC5_ARATH	493	2e-138	3-hydroxyisobutyryl-CoA hydrolase-like protein 2, mitochondrial OS=Arabidopsis thaliana GN=At4g31810 PE=2 SV=1	BMEI1196	224	3e-58	COG1024	Enoyl-CoA hydratase/carnithine racemase	--	--	--	--	--	-	-	GO:0043231//intracellular membrane-bounded organelle
Unigene30612_All	lysine biosynthesis I and II	aspartate family amino acid biosynthesis	480	7.1291	1.0099	-2.8195	Down	8.7245e-06	7.5134e-05	gi|126257055|gb|ABO09875.1|	316	8e-86	monofunctional aspartate kinase 1 [Zea mays]	sp|Q9LYU8|AK1_ARATH	288	1e-77	Aspartokinase 1, chloroplastic OS=Arabidopsis thaliana GN=AK1 PE=1 SV=1	DR1365	133	2e-31	COG0527	Aspartokinases	K00928	3e-86	314	osa:4334794	aspartate kinase [EC:2.7.2.4]	GO:0006520//cellular amino acid metabolic process	GO:0031406//carboxylic acid binding;GO:0016774//phosphotransferase activity, carboxyl group as acceptor	GO:0043231//intracellular membrane-bounded organelle
Unigene12760_All	lysine biosynthesis IV	homoaconitate hydratase	3226	83.9455	38.1294	-1.1385	Down	3.5403e-105	7.9877e-103	gi|75225211|sp|Q6YZX6.1|ACOC_ORYSJ	1719	0	RecName: Full=Putative aconitate hydratase, cytoplasmic; Short=Aconitase; AltName: Full=Citrate hydro-lyase	sp|Q9SIB9|ACO2M_ARATH	1625	0	Aconitate hydratase 2, mitochondrial OS=Arabidopsis thaliana GN=ACO2 PE=1 SV=2	BS_citB	983	0	COG1048	Aconitase A	K01681	0	1716	sbi:SORBI_07g005390	aconitate hydratase 1 [EC:4.2.1.3]	-	-	-
Unigene37436_All	methionine biosynthesis I and II	5-methyltetrahydropteroyltriglutamate-homocysteine s-methyltransferase activity	487	7.5112	0.4977	-3.9157	Down	1.0336e-07	1.287e-06	gi|224104961|ref|XP_002313635.1|	200	5e-51	vitamin-b12 independent methionine synthase, 5-methyltetrahydropteroyltriglutamate-homocysteine [Populus trichocarpa] >gi|222850043|gb|EEE87590.1| vitamin-b12 independent methionine synthase, 5-methyltetrahydropteroyltriglutamate-homocysteine [Populus trichocarpa]	sp|Q9UT19|METE_SCHPO	210	4e-54	Probable 5-methyltetrahydropteroyltriglutamate--homocysteine methyltransferase OS=Schizosaccharomyces pombe (strain ATCC 38366 / 972) GN=SPAC9.09 PE=1 SV=1	SPAC9.09	210	1e-54	COG0620	Methionine synthase II (cobalamin-independent)	K00549	1e-52	202	cme:CMJ234C	5-methyltetrahydropteroyltriglutamate--homocysteine methyltransferase [EC:2.1.1.14]	GO:0000097//sulfur amino acid biosynthetic process	GO:0046872//metal ion binding;GO:0008172//S-methyltransferase activity	GO:0009536//plastid
Unigene17456_All	methionine biosynthesis I and II	cystathionine beta-lyase activity	1401	14.9078	7.1796	-1.0541	Down	1.4323e-08	2.033e-07	gi|226500444|ref|NP_001148100.1|	729	0	LOC100281708 [Zea mays] >gi|195615792|gb|ACG29726.1| cystathionine gamma-synthase [Zea mays]	sp|P53780|METC_ARATH	624	4e-178	Cystathionine beta-lyase, chloroplastic OS=Arabidopsis thaliana GN=At3g57050 PE=1 SV=1	BS_yjcJ	345	1e-94	COG0626	Cystathionine beta-lyases/cystathionine gamma-synthases	K01760	0	723	osa:4340283	cystathionine beta-lyase [EC:4.4.1.8]	-	GO:0048037//cofactor binding;GO:0016846//carbon-sulfur lyase activity	GO:0009536//plastid
Unigene37729_All	methionine degradation I	S-adenosylhomocysteine hydrolase	469	10.8187	1.0336	-3.3878	Down	2.5757e-09	4.0348e-08	gi|71000473|dbj|BAE07182.1|	195	2e-49	S-adenosyl-L-homocysteine hydrolase [Beta vulgaris]	sp|P83783|SAHH_CANAL	277	2e-74	Adenosylhomocysteinase OS=Candida albicans GN=SAH1 PE=1 SV=2	YER043c	261	5e-70	COG0499	S-adenosylhomocysteine hydrolase	K01251	3e-73	270	zma:100274418	adenosylhomocysteinase [EC:3.3.1.1]	GO:0044237//cellular metabolic process	GO:0016802	-
Unigene23667_All	starch degradation	4-alpha-glucanotransferase	957	8.3845	3.5457	-1.2417	Down	6.6223e-05	0.00045914	gi|115473897|ref|NP_001060547.1|	620	1e-177	Os07g0662900 [Oryza sativa Japonica Group] >gi|113612083|dbj|BAF22461.1| Os07g0662900 [Oryza sativa Japonica Group]	sp|Q69Q02|DPE2_ORYSJ	620	3e-177	4-alpha-glucanotransferase DPE2 OS=Oryza sativa subsp. japonica GN=DPE2 PE=2 SV=1	CT087	206	4e-53	COG1640	4-alpha-glucanotransferase	K00705	5e-180	627	sbi:SORBI_02g042100	4-alpha-glucanotransferase [EC:2.4.1.25]	-	-	-
Unigene12747_All	starch degradation	beta-amylase	1678	1755.43	744.748	-1.237	Down	0	0	gi|61006818|gb|AAX37357.1|	1046	0	tissue-ubiquitous beta-amylase 2 [Hordeum vulgare subsp. vulgare] >gi|116256781|gb|ABJ90482.1| beta-amylase 2 [Hordeum vulgare subsp. vulgare] >gi|229610891|emb|CAX51377.1| beta-amylase [Hordeum vulgare subsp. vulgare] >gi|283969679|gb|ADB54609.1| beta-amylase 2 [Hordeum vulgare subsp. spontaneum] >gi|283969681|gb|ADB54610.1| beta-amylase 2 [Hordeum vulgare subsp. vulgare] >gi|283969683|gb|ADB546…	sp|P93594|AMYB_WHEAT	1020	0	Beta-amylase OS=Triticum aestivum GN=BMY1 PE=2 SV=1	--	--	--	--	--	K01177	5e-122	435	ath:AT4G17090	beta-amylase [EC:3.2.1.2]	-	-	-
Unigene541_All	starch degradation	hexokinase	1194	13.3416	6.5973	-1.016	Down	1.584e-06	1.5932e-05	gi|110808552|sp|Q2KNB9.1|HXK2_ORYSJ	700	0	RecName: Full=Hexokinase-2; AltName: Full=Hexokinase-3 >gi|62130758|gb|AAX68419.1| hexokinase 3 [Oryza sativa Japonica Group] >gi|73918005|gb|AAZ93619.1| hexokinase 2 [Oryza sativa Japonica Group]	sp|Q2KNB9|HXK2_ORYSJ	700	0	Hexokinase-2 OS=Oryza sativa subsp. japonica GN=HXK2 PE=2 SV=1	SPAC24H6.04	241	1e-63	COG5026	Hexokinase	K00844	0	630	vvi:100242358	hexokinase [EC:2.7.1.1]	GO:0006007//glucose catabolic process	GO:0032559//adenyl ribonucleotide binding;GO:0016772//transferase activity, transferring phosphorus-containing groups	-
Unigene28452_All	starch degradation	alpha-amylase/trypsin inhibitor precursor, putative	804	60.7608	8.7424	-2.797	Down	1.6475e-65	2.306e-63	gi|225102|prf||1208404A	270	2e-71	trypsin/amylase inhibitor pUP13	sp|P01088|ITRF_MAIZE	101	7e-21	Trypsin/factor XIIA inhibitor OS=Zea mays PE=1 SV=2	--	--	--	--	--	--	--	--	--	--	-	-	-
Unigene10118_All	starch degradation	alpha-amylase/subtilisin inhibitor, putative, expressed	534	11.0486	3.4041	-1.6985	Down	1.6384e-05	0.00013268	gi|289551948|gb|ACV65034.1|	65.5	3e-10	alpha-amylase inhibitor [Oryza sativa Indica Group]	sp|P29421|IAAS_ORYSJ	65.5	2e-10	Alpha-amylase/subtilisin inhibitor OS=Oryza sativa subsp. japonica GN=RASI PE=1 SV=2	--	--	--	--	--	--	--	--	--	--	-	GO:0004866//endopeptidase inhibitor activity	-
Unigene25771_All	starch synthesis	glycogen/starch synthases, ADP-glucose type family protein, expressed	890	35.2672	11.8464	-1.5739	Down	2.3004e-21	9.5623e-20	gi|18652407|gb|AAL77109.1|	397	1e-109	granule-bound starch synthase [Hordeum vulgare subsp. vulgare] >gi|48716085|dbj|BAD22851.1| granule bound starch synthase I [Hordeum vulgare subsp. spontaneum] >gi|229610863|emb|CAX51363.1| granule bound starch synthase [Hordeum vulgare subsp. vulgare] >gi|291501567|gb|ADE08466.1| granule bound starch synthase I [Hordeum vulgare subsp. vulgare]	sp|P09842|SSG1_HORVU	397	7e-110	Granule-bound starch synthase 1, chloroplastic/amyloplastic OS=Hordeum vulgare GN=WAXY PE=1 SV=1	BS_glgA	102	1e-21	COG0297	Glycogen synthase	K13679	8e-97	350	sbi:SORBI_10g002140	granule-bound starch synthase [EC:2.4.1.242]	-	-	-
Unigene22147_All	starch synthesis	Glucose-1-phosphate adenylyltransferase large subunit 1, chloroplast precursor, putative, expressed	1135	8.2132	3.9506	-1.0559	Down	0.00015624	0.00096129	gi|2105137|gb|AAC49729.1|	655	0	ADP-glucose pyrophosphorylase large subunit [Hordeum vulgare subsp. vulgare]	sp|P12298|GLGL1_WHEAT	576	9e-164	Glucose-1-phosphate adenylyltransferase large subunit (Fragment) OS=Triticum aestivum GN=AGA.1 PE=2 SV=1	all4645	380	2e-105	COG0448	ADP-glucose pyrophosphorylase	K00975	6e-174	607	osa:4334020	glucose-1-phosphate adenylyltransferase [EC:2.7.7.27]	GO:0005977//glycogen metabolic process	GO:0070566//adenylyltransferase activity	GO:0009536//plastid
Unigene4770_All	starch synthesis	Glucose-1-phosphate adenylyltransferase large subunit 1, chloroplast precursor, putative, expressed	1395	45.5925	22.6738	-1.0078	Down	1.2796e-21	5.403e-20	gi|27464770|gb|AAO16183.1|	927	0	ADP-glucose pyrophosphorylase small subunit [Hordeum vulgare subsp. vulgare]	sp|P15280|GLGS_ORYSJ	818	0	Glucose-1-phosphate adenylyltransferase small subunit, chloroplastic/amyloplastic OS=Oryza sativa subsp. japonica GN=AGPS PE=2 SV=4	all4645	565	5e-161	COG0448	ADP-glucose pyrophosphorylase	K00975	0	849	zma:542072	glucose-1-phosphate adenylyltransferase [EC:2.7.7.27]	-	-	-
Unigene31824_All	starch synthesis + starch degradation	beta-amylase, putative, expressed or beta-amylase	339	6.6135	0	-12.6912	Down	2.4857e-06	2.4046e-05	gi|229610899|emb|CAX51381.1|	177	4e-44	beta-amylase [Hordeum vulgare subsp. vulgare]	sp|O80831|BAM7_ARATH	169	6e-42	Beta-amylase 7 OS=Arabidopsis thaliana GN=BAM7 PE=2 SV=2	--	--	--	--	--	K01177	2e-27	117	osa:4349417	beta-amylase [EC:3.2.1.2]	-	-	-
Unigene3963_All	starch synthesis + starch degradation	alpha-amylase isozyme C, putative, expressed or alpha-amylase activity	799	96.7328	11.0722	-3.1271	Down	9.0858e-115	2.2765e-112	gi|115479547|ref|NP_001063367.1|	383	1e-105	Os09g0457400 [Oryza sativa Japonica Group] >gi|78099753|sp|P27932.2|AMY3A_ORYSJ RecName: Full=Alpha-amylase isozyme 3A; AltName: Full=1,4-alpha-D-glucan glucanohydrolase; Flags: Precursor >gi|51536195|dbj|BAD38366.1| Alpha-amylase isozyme 3A precursor (1,4-alpha-D-glucan glucanohydrolase) [Oryza sativa Japonica Group] >gi|113631600|dbj|BAF25281.1| Os09g0457400 [Oryza sativa Japonica Group]	sp|P27932|AMY3A_ORYSJ	383	9e-106	Alpha-amylase isozyme 3A OS=Oryza sativa subsp. japonica GN=AMY1.2 PE=2 SV=2	--	--	--	--	--	K01176	7e-93	337	osa:4345812	alpha-amylase [EC:3.2.1.1]	-	-	-
Unigene1103_All	starch synthesis + starch degradation	alpha-amylase isozyme 3E precursor, putative, expressed or alpha-amylase activity	1601	68.3968	10.5216	-2.7006	Down	2.0587e-139	6.183e-137	gi|229610881|emb|CAX51372.1|	746	0	alpha-amylase [Hordeum vulgare subsp. vulgare]	sp|P00693|AMY1_HORVU	744	0	Alpha-amylase type A isozyme OS=Hordeum vulgare GN=AMY1.1 PE=1 SV=1	amyA	70.5	8e-12	COG0366	Glycosidases	K01176	0	681	osa:4342055	alpha-amylase [EC:3.2.1.1]	-	-	-
Unigene25114_All	starch synthesis + starch degradation	phosphoglucomutase	923	8.8212	3.8076	-1.2121	Down	8.0224e-05	0.00054107	gi|115471885|ref|NP_001059541.1|	351	7e-96	Os07g0447800 [Oryza sativa Japonica Group] >gi|113611077|dbj|BAF21455.1| Os07g0447800 [Oryza sativa Japonica Group]	--	--	--	--	lin1985	143	4e-34	COG1109	Phosphomannomutase	K01840	1e-30	130	cme:CMC121C	phosphomannomutase [EC:5.4.2.8]	GO:0044238//primary metabolic process	GO:0016868//intramolecular transferase activity, phosphotransferases	GO:0009536//plastid
Unigene22925_All	threonine biosynthesis from homoserine	threonine synthase	1020	41.0684	17.9405	-1.1948	Down	5.9774e-19	2.1738e-17	gi|226504054|ref|NP_001149770.1|	480	1e-134	threonine synthase [Zea mays] >gi|195633095|gb|ACG36731.1| threonine synthase [Zea mays]	sp|Q9SSP5|THRC2_ARATH	429	2e-119	Threonine synthase 2, chloroplastic OS=Arabidopsis thaliana GN=TS2 PE=1 SV=1	MJ1465	162	7e-40	COG0498	Threonine synthase	K01733	2e-137	486	sbi:SORBI_03g031880	threonine synthase [EC:4.2.3.1]	-	-	-
Unigene21342_All	threonine degradation III	lactoylglutathione lyase	1253	6.4038	2.4179	-1.4052	Down	1.146e-05	9.6512e-05	gi|115462755|ref|NP_001054977.1|	550	1e-155	Os05g0230900 [Oryza sativa Japonica Group] >gi|113578528|dbj|BAF16891.1| Os05g0230900 [Oryza sativa Japonica Group]	sp|Q8W593|LGUC_ARATH	512	2e-144	Probable lactoylglutathione lyase, chloroplast OS=Arabidopsis thaliana GN=At1g67280 PE=2 SV=1	STM1435	160	3e-39	COG0346	Lactoylglutathione lyase and related lyases	--	--	--	--	--	-	-	-
Unigene38862_All	threonine degradation III	lactoylglutathione lyase	1243	30.1881	14.6244	-1.0456	Down	4.1058e-14	1.0549e-12	gi|226500882|ref|NP_001147530.1|	504	1e-141	lactoylglutathione lyase [Zea mays] >gi|195612008|gb|ACG27834.1| lactoylglutathione lyase [Zea mays]	sp|Q8W593|LGUC_ARATH	502	3e-141	Probable lactoylglutathione lyase, chloroplast OS=Arabidopsis thaliana GN=At1g67280 PE=2 SV=1	RSc0520	168	2e-41	COG0346	Lactoylglutathione lyase and related lyases	--	--	--	--	--	-	-	-
Unigene23403_All	asparagine degradation I and II	asparaginase	976	7.9795	16.6385	1.0602	Up	4.9183e-07	5.4681e-06	gi|11066973|gb|AAG28786.1|AF308474_1	480	1e-134	asparaginase [Hordeum vulgare subsp. vulgare]	sp|Q8GXG1|ASPG2_ARATH	365	3e-100	Probable isoaspartyl peptidase/L-asparaginase 2 OS=Arabidopsis thaliana GN=At3g16150 PE=2 SV=2	RSc1378	161	1e-39	COG1446	Asparaginase	K13051	4e-123	438	sbi:SORBI_06g030910	beta-aspartyl-peptidase (threonine type) [EC:3.4.19.5]	-	GO:0016787//hydrolase activity	-
Unigene14968_All	aspartate biosynthesis and degradation II + asparagine biosynthesis I and degradation I	aspartate transaminase	1814	3.3175	45.1614	3.7669	Up	3.3968e-144	1.0479e-141	gi|115479507|ref|NP_001063347.1|	787	0	Os09g0453800 [Oryza sativa Japonica Group] >gi|113631580|dbj|BAF25261.1| Os09g0453800 [Oryza sativa Japonica Group] >gi|122936799|tpd|FAA00314.1| TPA: aminotransferase [Oryza sativa Japonica Group]	sp|P77806|YBDL_ECOLI	296	3e-79	Aminotransferase YbdL OS=Escherichia coli (strain K12) GN=ybdL PE=1 SV=1	Rv0858c	318	2e-86	COG0436	Aspartate/tyrosine/aromatic aminotransferase	K00815	7e-33	139	zma:100193424	tyrosine aminotransferase [EC:2.6.1.5]	GO:0008152//metabolic process	GO:0016846//carbon-sulfur lyase activity;GO:0048037//cofactor binding;GO:0008483//transaminase activity	GO:0043231//intracellular membrane-bounded organelle
Unigene13428_All	Hordein	avenin-like seed protein	696	526.08	1257.15	1.2568	Up	0	0	gi|281335542|gb|ADA62374.1|	193	1e-48	gliadin/avenin-like seed protein [Triticum aestivum]	sp|Q09114|AVEE_AVESA	87	1e-16	Avenin-E OS=Avena sativa PE=1 SV=1	--	--	--	--	--	--	--	--	--	--	-	-	-
Unigene41725_All	methionine degradation I	S-adenosylhomocysteine hydrolase	522	9.0421	92.1676	3.3495	Up	2.2614e-77	3.7566e-75	gi|417745|sp|P32112.1|SAHH_WHEAT	170	7e-42	RecName: Full=Adenosylhomocysteinase; Short=AdoHcyase; AltName: Full=S-adenosyl-L-homocysteine hydrolase >gi|170773|gb|AAA34303.1| S-adenosyl-L-homocysteine hydrolase [Triticum aestivum]	sp|P32112|SAHH_WHEAT	170	4e-42	Adenosylhomocysteinase OS=Triticum aestivum GN=SAHH PE=2 SV=1	SMc02755	118	6e-27	COG0499	S-adenosylhomocysteine hydrolase	K01251	1e-41	166	zma:100282150	adenosylhomocysteinase [EC:3.3.1.1]	-	-	-
Unigene21298_All	starch synthesis + starch degradation	alpha-amylase/trypsin inhibitor precursor, putative	695	943.824	2544.42	1.4307	Up	0	0	gi|85682780|sp|P01086.3|IAAE_HORVU	307	9e-83	RecName: Full=Trypsin inhibitor CMe; AltName: Full=Alpha-amylase/trypsin inhibitor; AltName: Full=BTI-CMe1; AltName: Full=BTI-CMe2.1; AltName: Full=BTI-CMe3.1; AltName: Full=Chloroform/methanol-soluble protein CMe; Flags: Precursor >gi|19009|emb|CAA46705.1| CMe [Hordeum vulgare subsp. vulgare]	sp|P01086|IAAE_HORVU	307	5e-83	Trypsin inhibitor CMe OS=Hordeum vulgare GN=ITR1 PE=1 SV=3	--	--	--	--	--	--	--	--	--	--	GO:0006950//response to stress	GO:0004866//endopeptidase inhibitor activity	GO:0044464//cell part
Unigene41957_All	starch synthesis	glycogen/starch synthases, ADP-glucose type family protein, expressed	872	10.4197	33.7713	1.6965	Up	2.3461e-22	1.035e-20	gi|18652407|gb|AAL77109.1|	392	1e-108	granule-bound starch synthase [Hordeum vulgare subsp. vulgare] >gi|48716085|dbj|BAD22851.1| granule bound starch synthase I [Hordeum vulgare subsp. spontaneum] >gi|229610863|emb|CAX51363.1| granule bound starch synthase [Hordeum vulgare subsp. vulgare] >gi|291501567|gb|ADE08466.1| granule bound starch synthase I [Hordeum vulgare subsp. vulgare]	sp|P09842|SSG1_HORVU	392	1e-108	Granule-bound starch synthase 1, chloroplastic/amyloplastic OS=Hordeum vulgare GN=WAXY PE=1 SV=1	RSp0242	100	2e-21	COG0297	Glycogen synthase	K13679	1e-95	346	sbi:SORBI_10g002140	granule-bound starch synthase [EC:2.4.1.242]	-	-	-
Unigene16515_All	starch synthesis + starch degradation	alpha-amylase/trypsin inhibitor precursor, putative	768	352.615	1147.81	1.7027	Up	0	0	gi|161784337|sp|P34951.2|IAAC_HORVU	300	1e-80	RecName: Full=Trypsin inhibitor CMc; AltName: Full=Chloroform/methanol-soluble protein CMc; Short=BTICMc; Flags: Precursor >gi|9650762|emb|CAA72791.1| trypsin inhibitor, BTICMc [Hordeum vulgare subsp. vulgare]	sp|P34951|IAAC_HORVU	300	5e-81	Trypsin inhibitor CMc OS=Hordeum vulgare GN=ITR2 PE=1 SV=2	--	--	--	--	--	--	--	--	--	--	-	-	-
Unigene40269_All	starch synthesis + starch degradation	alpha-amylase/trypsin inhibitor precursor, putative	622	1.1383	133.073	6.8692	Up	6.4333e-198	2.6523e-195	gi|225102|prf||1208404A	272	2e-72	trypsin/amylase inhibitor pUP13	sp|P01088|ITRF_MAIZE	103	7e-22	Trypsin/factor XIIA inhibitor OS=Zea mays PE=1 SV=2	--	--	--	--	--	--	--	--	--	--	-	-	-
Unigene2904_All	starch synthesis + starch degradation	1,4-alpha-glucan branching enzyme IIB, chloroplast precursor, putative, expressed 1,4-alpha-glucan branching enzyme	596	6.9295	17.6901	1.3521	Up	9.2959e-07	9.7971e-06	gi|4826590|gb|AAD30187.1|	286	9e-77	starch branching enzyme I [Aegilops tauschii subsp. strangulata]	sp|Q01401|GLGB_ORYSJ	214	4e-55	1,4-alpha-glucan-branching enzyme, chloroplastic/amyloplastic OS=Oryza sativa subsp. japonica GN=SBE1 PE=1 SV=2	YEL011w	49.3	5e-06	COG0296	1,4-alpha-glucan branching enzyme	K00700	6e-56	214	osa:4342117	1,4-alpha-glucan branching enzyme [EC:2.4.1.18]	-	-	-
Unigene38009_All	starch synthesis + starch degradation	beta-amylase, putative, expressed or beta-amylase	796	0	5.0241	12.2946	Up	7.3766e-11	1.3944e-09	gi|229610897|emb|CAX51380.1|	353	1e-96	beta-amylase [Hordeum vulgare subsp. vulgare]	sp|O23553|BAM3_ARATH	218	3e-56	Beta-amylase 3, chloroplastic OS=Arabidopsis thaliana GN=BAM3 PE=1 SV=3	DR2417m	49.7	6e-06	COG0595	Predicted hydrolase of the metallo-beta-lactamase superfamily	K01177	2e-75	279	osa:4349417	beta-amylase [EC:3.2.1.2]	GO:0005982//starch metabolic process;GO:0006950//response to stress;GO:0000023//maltose metabolic process	GO:0016160//amylase activity;GO:0043167//ion binding	GO:0009532//plastid stroma
Unigene41982_All	threonine degradation III	lactoylglutathione lyase activity	1039	0	7.4649	12.8659	Up	2.266e-20	8.9514e-19	gi|115473821|ref|NP_001060509.1|	337	1e-91	Os07g0657100 [Oryza sativa Japonica Group] >gi|34395261|dbj|BAC83945.1| glyoxalase family-like protein [Oryza sativa Japonica Group] >gi|113612045|dbj|BAF22423.1| Os07g0657100 [Oryza sativa Japonica Group]	sp|Q9UQ35|SRRM2_HUMAN	63.5	2e-09	Serine/arginine repetitive matrix protein 2 OS=Homo sapiens GN=SRRM2 PE=1 SV=2	DR2417m	58.2	2e-08	COG0595	Predicted hydrolase of the metallo-beta-lactamase superfamily	K13171	3e-06	50.4	ath:AT2G29210	serine/arginine repetitive matrix protein 1	-	-	-
Unigene26023_All	asparagine biosynthesis I	amino acid catabolism	205	8.0585	2.9558	-1.44696				gi|115467482|ref|NP_001057340.1|	133	7e-31	Os06g0265000 [Oryza sativa Japonica Group] >gi|3182921|sp|Q43011.3|ASNS_ORYSJ RecName: Full=Asparagine synthetase [glutamine-hydrolyzing]; AltName: Full=Glutamine-dependent asparagine synthetase >gi|1432054|gb|AAB03991.1| asparagine synthetase [Oryza sativa Japonica Group] >gi|1902992|dbj|BAA18951.1| asparagine synthetase [Oryza sativa Japonica Group] >gi|53793170|dbj|BAD54377.1| asparagine synth…	sp|Q43011|ASNS_ORYSJ	133	4e-31	Asparagine synthetase [glutamine-hydrolyzing] OS=Oryza sativa subsp. japonica GN=Os06g0265000 PE=2 SV=3	asnB	84	6e-17	COG0367	Asparagine synthase (glutamine-hydrolyzing)	K01953	1e-32	134	sbi:SORBI_10g009590	asparagine synthase (glutamine-hydrolysing) [EC:6.3.5.4]	-	-	-
Unigene12855_All	asparagine biosynthesis I	glutamine-fructose-6-phosphate transaminase (isomerizing)	2121	37.2746	21.8835	-0.768349				gi|13925886|gb|AAK49456.1|AF307145_1	1197	0	glutamine-dependent asparagine synthetase 1 [Hordeum vulgare subsp. vulgare]	sp|P31752|ASNS_ASPOF	1036	0	Asparagine synthetase [glutamine-hydrolyzing] OS=Asparagus officinalis PE=2 SV=2	STM0680	623	4e-178	COG0367	Asparagine synthase (glutamine-hydrolyzing)	K01953	0	1056	zma:100192349	asparagine synthase (glutamine-hydrolysing) [EC:6.3.5.4]	GO:0009064//glutamine family amino acid metabolic process;GO:0006528//asparagine metabolic process	GO:0016884//carbon-nitrogen ligase activity, with glutamine as amido-N-donor;GO:0032559//adenyl ribonucleotide binding	-
Unigene11982_All	asparagine biosynthesis I	amino acid catabolism	501	6.5948	4.354	-0.598988				gi|205362418|emb|CAR70072.1|	341	2e-93	asparagine synthetase [Zea mays] >gi|208011515|emb|CAR82078.1| asparagine synthetase [Zea mays]	sp|Q43011|ASNS_ORYSJ	341	1e-93	Asparagine synthetase [glutamine-hydrolyzing] OS=Oryza sativa subsp. japonica GN=Os06g0265000 PE=2 SV=3	SPBC119.10	160	1e-39	COG0367	Asparagine synthase (glutamine-hydrolyzing)	K01953	2e-94	341	zma:542435	asparagine synthase (glutamine-hydrolysing) [EC:6.3.5.4]	-	-	-
Unigene21598_All	asparagine biosynthesis I	amino acid catabolism	830	21.183	14.8929	-0.508282				gi|115467482|ref|NP_001057340.1|	481	1e-135	Os06g0265000 [Oryza sativa Japonica Group] >gi|3182921|sp|Q43011.3|ASNS_ORYSJ RecName: Full=Asparagine synthetase [glutamine-hydrolyzing]; AltName: Full=Glutamine-dependent asparagine synthetase >gi|1432054|gb|AAB03991.1| asparagine synthetase [Oryza sativa Japonica Group] >gi|1902992|dbj|BAA18951.1| asparagine synthetase [Oryza sativa Japonica Group] >gi|53793170|dbj|BAD54377.1| asparagine synth…	sp|Q43011|ASNS_ORYSJ	481	3e-135	Asparagine synthetase [glutamine-hydrolyzing] OS=Oryza sativa subsp. japonica GN=Os06g0265000 PE=2 SV=3	ZasnB	295	6e-80	COG0367	Asparagine synthase (glutamine-hydrolyzing)	K01953	3e-136	481	osa:4340706	asparagine synthase (glutamine-hydrolysing) [EC:6.3.5.4]	-	-	-
Unigene28631_All	asparagine biosynthesis I	amino acid catabolism	808	14.8959	11.9988	-0.312025				gi|50400031|gb|AAT76419.1|	352	2e-96	expressed protein [Oryza sativa Japonica Group]	sp|P24805|TSJT1_TOBAC	110	9e-24	Stem-specific protein TSJT1 OS=Nicotiana tabacum GN=TSJT1 PE=2 SV=1	XF0118	59.3	7e-09	COG0367	Asparagine synthase (glutamine-hydrolyzing)	K01953	6e-08	55.5	ppp:PHYPADRAFT_226188	asparagine synthase (glutamine-hydrolysing) [EC:6.3.5.4]	-	-	GO:0016020//membrane;GO:0031410//cytoplasmic vesicle;GO:0043231//intracellular membrane-bounded organelle
Unigene12271_All	asparagine biosynthesis I	amino acid catabolism	320	5.1625	4.9232	-0.0684735				gi|28395526|gb|AAO39048.1|	225	1e-58	asparagine synthetase 2 [Hordeum vulgare]	sp|O24338|ASNS_SANAU	199	3e-51	Asparagine synthetase [glutamine-hydrolyzing] OS=Sandersonia aurantiaca GN=AND1 PE=2 SV=3	YPR145w	87.8	4e-18	COG0367	Asparagine synthase (glutamine-hydrolyzing)	K01953	1e-49	191	vvi:100241610	asparagine synthase (glutamine-hydrolysing) [EC:6.3.5.4]	-	-	-
Unigene13937_All	asparagine biosynthesis I	amino acid catabolism	1227	506.137	507.269	0.00322419				gi|451193|gb|AAC37416.1|	427	1e-144	wali7 [Triticum aestivum] >gi|1090845|prf||2019486B wali7 gene	sp|P24805|TSJT1_TOBAC	113	3e-24	Stem-specific protein TSJT1 OS=Nicotiana tabacum GN=TSJT1 PE=2 SV=1	XF0118	58.5	2e-08	COG0367	Asparagine synthase (glutamine-hydrolyzing)	K01953	2e-09	61.2	ppp:PHYPADRAFT_173106	asparagine synthase (glutamine-hydrolysing) [EC:6.3.5.4]	-	-	-
Unigene11600_All	asparagine biosynthesis I	amino acid catabolism	428	6.6168	6.7956	0.0384673				gi|28395526|gb|AAO39048.1|	275	1e-73	asparagine synthetase 2 [Hordeum vulgare]	sp|O24661|ASNS_TRIVS	253	3e-67	Asparagine synthetase [glutamine-hydrolyzing] OS=Triphysaria versicolor GN=AS PE=2 SV=3	STM0680	188	2e-48	COG0367	Asparagine synthase (glutamine-hydrolyzing)	K01953	1e-67	252	vvi:100241610	asparagine synthase (glutamine-hydrolysing) [EC:6.3.5.4]	-	-	-
Unigene16807_All	asparagine biosynthesis I	amino acid catabolism	309	9.165	10.9814	0.260855				gi|212275181|ref|NP_001131014.1|	140	6e-33	asparagine synthetase3 [Zea mays] >gi|208011519|emb|CAR82080.1| asparagine synthetase [Zea mays]	sp|P49078|ASNS_ARATH	117	2e-26	Asparagine synthetase [glutamine-hydrolyzing] OS=Arabidopsis thaliana GN=ASN1 PE=2 SV=2	XF0118	67.8	5e-12	COG0367	Asparagine synthase (glutamine-hydrolyzing)	K01953	3e-34	140	zma:100192350	asparagine synthase (glutamine-hydrolysing) [EC:6.3.5.4]	-	-	-
Unigene1072_All	asparagine biosynthesis I	amino acid catabolism	680	11.6264	14.792	0.347413				gi|28395526|gb|AAO39048.1|	289	2e-77	asparagine synthetase 2 [Hordeum vulgare]	sp|P49078|ASNS_ARATH	212	2e-54	Asparagine synthetase [glutamine-hydrolyzing] OS=Arabidopsis thaliana GN=ASN1 PE=2 SV=2	VC0991	146	3e-35	COG0367	Asparagine synthase (glutamine-hydrolyzing)	K01953	4e-62	234	zma:100192349	asparagine synthase (glutamine-hydrolysing) [EC:6.3.5.4]	-	-	-
Unigene9893_All	asparagine biosynthesis I	amino acid catabolism	873	54.8771	71.6298	0.384356				gi|205362422|emb|CAR70074.1|	535	1e-151	asparagine synthetase [Zea mays]	sp|P31752|ASNS_ASPOF	458	3e-128	Asparagine synthetase [glutamine-hydrolyzing] OS=Asparagus officinalis PE=2 SV=2	YPO2623	334	1e-91	COG0367	Asparagine synthase (glutamine-hydrolyzing)	K01953	4e-152	534	zma:100192350	asparagine synthase (glutamine-hydrolysing) [EC:6.3.5.4]	-	-	-
Unigene40245_All	asparagine biosynthesis I	amino acid catabolism	212	2.2264	3.4298	0.623412				gi|212275181|ref|NP_001131014.1|	51.6	3e-06	asparagine synthetase3 [Zea mays] >gi|208011519|emb|CAR82080.1| asparagine synthetase [Zea mays]	--	--	--	--	--	--	--	--	--	K01953	2e-07	51.6	zma:100192350	asparagine synthase (glutamine-hydrolysing) [EC:6.3.5.4]	-	-	-
Unigene22217_All	asparagine biosynthesis I	amino acid catabolism	789	52.1949	86.782	0.733487				gi|212275221|ref|NP_001131015.1|	269	3e-71	asparagine synthetase4 [Zea mays] >gi|208011521|emb|CAR82081.1| asparagine synthetase [Zea mays]	sp|P49094|ASNS_MAIZE	259	2e-68	Asparagine synthetase [glutamine-hydrolyzing] OS=Zea mays GN=ASN1 PE=2 SV=2	asnB	147	2e-35	COG0367	Asparagine synthase (glutamine-hydrolyzing)	K01953	4e-72	268	zma:100192350	asparagine synthase (glutamine-hydrolysing) [EC:6.3.5.4]	GO:0010468//regulation of gene expression;GO:0009064//glutamine family amino acid metabolic process;GO:0006528//asparagine metabolic process	GO:0016884//carbon-nitrogen ligase activity, with glutamine as amido-N-donor;GO:0032559//adenyl ribonucleotide binding	-
Unigene2577_All	asparagine biosynthesis I	amino acid catabolism	219	15.6255	28.7751	0.880919				gi|212275221|ref|NP_001131015.1|	135	1e-31	asparagine synthetase4 [Zea mays] >gi|208011521|emb|CAR82081.1| asparagine synthetase [Zea mays]	sp|O24338|ASNS_SANAU	121	1e-27	Asparagine synthetase [glutamine-hydrolyzing] OS=Sandersonia aurantiaca GN=AND1 PE=2 SV=3	STM0680	87	7e-18	COG0367	Asparagine synthase (glutamine-hydrolyzing)	K01953	9e-33	135	zma:100192350	asparagine synthase (glutamine-hydrolysing) [EC:6.3.5.4]	GO:0009064//glutamine family amino acid metabolic process;GO:0006528//asparagine metabolic process	GO:0016884//carbon-nitrogen ligase activity, with glutamine as amido-N-donor;GO:0032559//adenyl ribonucleotide binding	-
Unigene22101_All	asparagine biosynthesis I	amino acid catabolism	1083	11.5493	21.9324	0.925258				gi|50400031|gb|AAT76419.1|	366	1e-100	expressed protein [Oryza sativa Japonica Group]	sp|P24805|TSJT1_TOBAC	111	8e-24	Stem-specific protein TSJT1 OS=Nicotiana tabacum GN=TSJT1 PE=2 SV=1	XF0118	57.4	4e-08	COG0367	Asparagine synthase (glutamine-hydrolyzing)	K01953	3e-07	53.5	ppp:PHYPADRAFT_226188	asparagine synthase (glutamine-hydrolysing) [EC:6.3.5.4]	-	-	GO:0016020//membrane;GO:0031410//cytoplasmic vesicle;GO:0043231//intracellular membrane-bounded organelle
Unigene36509_All	asparagine biosynthesis I	amino acid catabolism	279	3.3835	9.1216	1.43077				gi|212275181|ref|NP_001131014.1|	106	7e-23	asparagine synthetase3 [Zea mays] >gi|208011519|emb|CAR82080.1| asparagine synthetase [Zea mays]	sp|P49093|ASNS2_LOTJA	92.8	6e-19	Asparagine synthetase [glutamine-hydrolyzing] 2 OS=Lotus japonicus GN=AS2 PE=2 SV=2	STM0680	50.8	6e-07	COG0367	Asparagine synthase (glutamine-hydrolyzing)	K01953	4e-24	106	zma:100192350	asparagine synthase (glutamine-hydrolysing) [EC:6.3.5.4]	GO:0009642//response to light intensity;GO:0009746;GO:0009267//cellular response to starvation;GO:0034285;GO:0006528//asparagine metabolic process	GO:0016884//carbon-nitrogen ligase activity, with glutamine as amido-N-donor;GO:0000166//nucleotide binding	-
Unigene40127_All	asparagine biosynthesis I	amino acid catabolism	983	0.2401	0	-7.9075				gi|50400031|gb|AAT76419.1|	366	1e-100	expressed protein [Oryza sativa Japonica Group]	sp|P24805|TSJT1_TOBAC	111	7e-24	Stem-specific protein TSJT1 OS=Nicotiana tabacum GN=TSJT1 PE=2 SV=1	XF0118	57.4	4e-08	COG0367	Asparagine synthase (glutamine-hydrolyzing)	K01953	3e-07	53.5	ppp:PHYPADRAFT_226188	asparagine synthase (glutamine-hydrolysing) [EC:6.3.5.4]	-	-	GO:0016020//membrane;GO:0031410//cytoplasmic vesicle;GO:0043231//intracellular membrane-bounded organelle
Unigene22452_All	asparagine biosynthesis II	L-3-cyanoalanine synthase activity	967	48.9325	29.3256	-0.738632				gi|226508112|ref|NP_001146719.1|	468	1e-131	cysteine synthase1 [Zea mays]	sp|O81155|CYSKP_SOLTU	433	8e-121	Cysteine synthase, chloroplastic/chromoplastic OS=Solanum tuberosum PE=2 SV=1	alr4552	307	2e-83	COG0031	Cysteine synthase	K01738	5e-132	468	zma:100280321	cysteine synthase A [EC:2.5.1.47]	-	-	-
Unigene42113_All	asparagine degradation I and II	asparaginase	288	9.8333	4.2079	-1.22458				gi|11066973|gb|AAG28786.1|AF308474_1	172	1e-42	asparaginase [Hordeum vulgare subsp. vulgare]	sp|Q8GXG1|ASPG2_ARATH	131	1e-30	Probable isoaspartyl peptidase/L-asparaginase 2 OS=Arabidopsis thaliana GN=At3g16150 PE=2 SV=2	AGl3520	71.2	4e-13	COG1446	Asparaginase	K13051	6e-41	162	sbi:SORBI_06g030910	beta-aspartyl-peptidase (threonine type) [EC:3.4.19.5]	-	-	-
Unigene1278_All	asparagine degradation I and II	asparaginase	1119	34.7987	34.1145	-0.0286483				gi|115454013|ref|NP_001050607.1|	430	1e-119	Os03g0597600 [Oryza sativa Japonica Group] >gi|113549078|dbj|BAF12521.1| Os03g0597600 [Oryza sativa Japonica Group]	sp|P50287|ASPG1_ARATH	399	2e-110	Isoaspartyl peptidase/L-asparaginase 1 OS=Arabidopsis thaliana GN=At5g08100 PE=1 SV=2	RSc1378	215	1e-55	COG1446	Asparaginase	K13051	1e-120	430	osa:4333381	beta-aspartyl-peptidase (threonine type) [EC:3.4.19.5]	-	-	-
Unigene17569_All	asparagine degradation I and II	asparaginase	1282	11.5054	11.8163	0.0384672				gi|11066973|gb|AAG28786.1|AF308474_1	655	0	asparaginase [Hordeum vulgare subsp. vulgare]	sp|Q8GXG1|ASPG2_ARATH	496	1e-139	Probable isoaspartyl peptidase/L-asparaginase 2 OS=Arabidopsis thaliana GN=At3g16150 PE=2 SV=2	RSc1378	226	5e-59	COG1446	Asparaginase	K13051	1e-172	603	sbi:SORBI_06g030910	beta-aspartyl-peptidase (threonine type) [EC:3.4.19.5]	-	GO:0016811//hydrolase activity, acting on carbon-nitrogen (but not peptide) bonds, in linear amides	-
Unigene25183_All	asparagine degradation I and II	asparaginase	322	8.795	11.6671	0.407691				gi|115461394|ref|NP_001054297.1|	182	1e-45	Os04g0682500 [Oryza sativa Japonica Group] >gi|113565868|dbj|BAF16211.1| Os04g0682500 [Oryza sativa Japonica Group]	sp|O65268|ASPG4_ARATH	140	3e-33	Probable isoaspartyl peptidase/L-asparaginase 4 OS=Arabidopsis thaliana GN=At4g00590 PE=2 SV=3	PAB0145	75.1	3e-14	COG1446	Asparaginase	K08657	7e-32	132	ppp:PHYPADRAFT_124736	taspase, threonine aspartase, 1 [EC:3.4.25.-]	-	GO:0016811//hydrolase activity, acting on carbon-nitrogen (but not peptide) bonds, in linear amides	-
Unigene31550_All	aspartate biosynthesis and degradation II + asparagine biosynthesis I and degradation I	aspartate transaminase	472	4.75	0.7703	-2.62444				gi|298710366|emb|CBJ31983.1|	167	3e-41	aspartate aminotransferase [Ectocarpus siliculosus]	sp|Q5REB0|AATM_PONAB	169	9e-42	Aspartate aminotransferase, mitochondrial OS=Pongo abelii GN=GOT2 PE=2 SV=1	SPBC725.01	150	1e-36	COG1448	Aspartate/tyrosine/aromatic aminotransferase	K00813	1e-35	145	osa:4325621	aspartate aminotransferase [EC:2.6.1.1]	-	-	-
Unigene25588_All	aspartate biosynthesis and degradation II + asparagine biosynthesis I and degradation I	aspartate transaminase	283	5.4205	1.7129	-1.66199				gi|298710366|emb|CBJ31983.1|	125	2e-28	aspartate aminotransferase [Ectocarpus siliculosus]	sp|P00507|AATM_RAT	141	1e-33	Aspartate aminotransferase, mitochondrial OS=Rattus norvegicus GN=Got2 PE=1 SV=2	SPBC725.01	115	2e-26	COG1448	Aspartate/tyrosine/aromatic aminotransferase	K00813	2e-28	120	rcu:RCOM_0323510	aspartate aminotransferase [EC:2.6.1.1]	-	GO:0008483//transaminase activity	GO:0043231//intracellular membrane-bounded organelle
Unigene12986_All	aspartate biosynthesis and degradation II + asparagine biosynthesis I and degradation I	aspartate transaminase	1051	52.8807	27.9043	-0.922254				gi|633095|dbj|BAA08106.1|	631	1e-180	plastidic aspartate aminotransferase [Panicum miliaceum]	sp|P46248|AAT5_ARATH	544	5e-154	Aspartate aminotransferase, chloroplastic OS=Arabidopsis thaliana GN=ASP5 PE=1 SV=2	PM0621	310	2e-84	COG1448	Aspartate/tyrosine/aromatic aminotransferase	K00813	1e-179	626	osa:4331017	aspartate aminotransferase [EC:2.6.1.1]	-	-	-
Unigene8505_All	aspartate biosynthesis and degradation II + asparagine biosynthesis I and degradation I	aspartate transaminase	1753	36.6181	19.8408	-0.884087				gi|115452503|ref|NP_001049852.1|	820	0	Os03g0299900 [Oryza sativa Japonica Group] >gi|113548323|dbj|BAF11766.1| Os03g0299900 [Oryza sativa Japonica Group]	sp|Q93ZN9|DAPAT_ARATH	709	0	LL-diaminopimelate aminotransferase, chloroplastic OS=Arabidopsis thaliana GN=DAP PE=1 SV=1	alr5103	338	1e-92	COG0436	Aspartate/tyrosine/aromatic aminotransferase	K10206	0	820	osa:4332563	LL-diaminopimelate aminotransferase [EC:2.6.1.83]	-	-	-
Unigene912_All	aspartate biosynthesis and degradation II + asparagine biosynthesis I and degradation I	aspartate transaminase	485	19.4638	10.7445	-0.857195				gi|195636088|gb|ACG37512.1|	206	7e-53	aspartate aminotransferase [Zea mays]	sp|Q5F4K8|PAT_PINPS	145	9e-35	Aspartate aminotransferase OS=Pinus pinaster GN=AAT PE=1 SV=1	lin2011	95.5	4e-20	COG0436	Aspartate/tyrosine/aromatic aminotransferase	K12826	8e-06	47	pop:POPTR_667866	splicing factor 3A subunit 2	GO:0008152//metabolic process	GO:0016846//carbon-sulfur lyase activity;GO:0048037//cofactor binding;GO:0008483//transaminase activity	GO:0043231//intracellular membrane-bounded organelle
Unigene24130_All	aspartate biosynthesis and degradation II + asparagine biosynthesis I and degradation I	aspartate transaminase	597	52.5759	30.4492	-0.787997				gi|29468084|gb|AAO23563.1|	179	2e-44	aspartate aminotransferase [Oryza sativa]	sp|P46248|AAT5_ARATH	171	4e-42	Aspartate aminotransferase, chloroplastic OS=Arabidopsis thaliana GN=ASP5 PE=1 SV=2	SPBC725.01	74.3	1e-13	COG1448	Aspartate/tyrosine/aromatic aminotransferase	K00813	1e-45	179	osa:4331017	aspartate aminotransferase [EC:2.6.1.1]	-	-	-
Unigene17141_All	aspartate biosynthesis and degradation II + asparagine biosynthesis I and degradation I	aspartate transaminase	1599	21.0318	12.7327	-0.724034				gi|115466180|ref|NP_001056689.1|	640	0	Os06g0130400 [Oryza sativa Japonica Group] >gi|113594729|dbj|BAF18603.1| Os06g0130400 [Oryza sativa Japonica Group]	sp|Q8GYY0|1A112_ARATH	442	4e-123	Probable aminotransferase ACS12 OS=Arabidopsis thaliana GN=ACS12 PE=2 SV=2	aq_1969	129	2e-29	COG0436	Aspartate/tyrosine/aromatic aminotransferase	--	--	--	--	--	-	-	-
Unigene189_All	aspartate biosynthesis and degradation II + asparagine biosynthesis I and degradation I	aspartate transaminase	1974	32.8174	22.2239	-0.562349				gi|115445217|ref|NP_001046388.1|	797	0	Os02g0236000 [Oryza sativa Japonica Group] >gi|113535919|dbj|BAF08302.1| Os02g0236000 [Oryza sativa Japonica Group]	sp|P46643|AAT1_ARATH	702	0	Aspartate aminotransferase, mitochondrial OS=Arabidopsis thaliana GN=ASP1 PE=1 SV=1	SPBC725.01	402	1e-111	COG1448	Aspartate/tyrosine/aromatic aminotransferase	K00813	0	797	osa:4328828	aspartate aminotransferase [EC:2.6.1.1]	-	-	-
Unigene11877_All	aspartate biosynthesis and degradation II + asparagine biosynthesis I and degradation I	aspartate transaminase activity	559	40.9514	36.8549	-0.152056				gi|115451309|ref|NP_001049255.1|	187	8e-47	Os03g0195100 [Oryza sativa Japonica Group] >gi|113547726|dbj|BAF11169.1| Os03g0195100 [Oryza sativa Japonica Group]	sp|Q93ZN9|DAPAT_ARATH	141	3e-33	LL-diaminopimelate aminotransferase, chloroplastic OS=Arabidopsis thaliana GN=DAP PE=1 SV=1	sll0480	97.4	1e-20	COG0436	Aspartate/tyrosine/aromatic aminotransferase	K10206	7e-48	187	osa:4331930	LL-diaminopimelate aminotransferase [EC:2.6.1.83]	-	-	-
Unigene5413_All	aspartate biosynthesis and degradation II + asparagine biosynthesis I and degradation I	aspartate transaminase	919	19.5167	18.8573	-0.049586				gi|115468452|ref|NP_001057825.1|	591	1e-168	Os06g0548000 [Oryza sativa Japonica Group] >gi|113595865|dbj|BAF19739.1| Os06g0548000 [Oryza sativa Japonica Group]	sp|P46643|AAT1_ARATH	531	3e-150	Aspartate aminotransferase, mitochondrial OS=Arabidopsis thaliana GN=ASP1 PE=1 SV=1	SPBC725.01	296	3e-80	COG1448	Aspartate/tyrosine/aromatic aminotransferase	K00813	4e-169	591	osa:4341252	aspartate aminotransferase [EC:2.6.1.1]	-	-	-
Unigene106_All	aspartate biosynthesis and degradation II + asparagine biosynthesis I and degradation I	aspartate transaminase	1869	27.8425	28.7245	0.044993				gi|115434860|ref|NP_001042188.1|	726	0	Os01g0178000 [Oryza sativa Japonica Group] >gi|113531719|dbj|BAF04102.1| Os01g0178000 [Oryza sativa Japonica Group]	sp|Q56232|AAT_THET8	150	2e-35	Aspartate aminotransferase OS=Thermus thermophilus (strain HB8 / ATCC 27634 / DSM 579) GN=aspC PE=1 SV=1	alr1039	214	3e-55	COG0436	Aspartate/tyrosine/aromatic aminotransferase	K10206	9e-17	86.3	sbi:SORBI_01g044130	LL-diaminopimelate aminotransferase [EC:2.6.1.83]	-	-	-
Unigene18264_All	aspartate biosynthesis and degradation II + asparagine biosynthesis I and degradation I	aspartate transaminase	1455	365.595	396.712	0.117848				gi|115440075|ref|NP_001044317.1|	838	0	Os01g0760600 [Oryza sativa Japonica Group] >gi|113533848|dbj|BAF06231.1| Os01g0760600 [Oryza sativa Japonica Group]	sp|P37833|AATC_ORYSJ	771	0	Aspartate aminotransferase, cytoplasmic OS=Oryza sativa subsp. japonica GN=Os01g0760600 PE=2 SV=1	SPBC725.01	394	2e-109	COG1448	Aspartate/tyrosine/aromatic aminotransferase	K00813	0	838	osa:4325621	aspartate aminotransferase [EC:2.6.1.1]	-	-	-
Unigene13905_All	aspartate biosynthesis and degradation II + asparagine degradation I	aspartate transaminase activity	1230	20.1462	25.3213	0.329844				gi|195636088|gb|ACG37512.1|	590	1e-167	aspartate aminotransferase [Zea mays]	sp|Q5F4K8|PAT_PINPS	489	2e-137	Aspartate aminotransferase OS=Pinus pinaster GN=AAT PE=1 SV=1	CC1534	253	4e-67	COG0436	Aspartate/tyrosine/aromatic aminotransferase	K00815	6e-24	109	cme:CMT533C	tyrosine aminotransferase [EC:2.6.1.5]	-	-	-
Unigene16565_All	aspartate degradation II	malate dehydrogenase	330	82.5995	49.944	-0.725822				gi|115438875|ref|NP_001043717.1|	86.7	8e-17	Os01g0649100 [Oryza sativa Japonica Group] >gi|19880701|gb|AAM00435.1|AF444195_1 malate dehydrogenase [Oryza sativa] >gi|113533248|dbj|BAF05631.1| Os01g0649100 [Oryza sativa Japonica Group]	sp|P83373|MDHM_FRAAN	73.2	5e-13	Malate dehydrogenase, mitochondrial OS=Fragaria ananassa GN=MMDHI PE=1 SV=1	YDL078c	50.8	6e-07	COG0039	Malate/lactate dehydrogenases	K00026	4e-18	86.7	osa:4326249	malate dehydrogenase [EC:1.1.1.37]	-	-	-
Unigene19576_All	aspartate degradation II	malate dehydrogenase	224	19.4909	11.9024	-0.711548				gi|195626292|gb|ACG34976.1|	139	1e-32	malate dehydrogenase [Zea mays]	sp|Q9SN86|MDHP_ARATH	125	8e-29	Malate dehydrogenase, chloroplastic OS=Arabidopsis thaliana GN=At3g47520 PE=1 SV=1	STM3359	99.4	1e-21	COG0039	Malate/lactate dehydrogenases	K00026	3e-34	140	zma:100193663	malate dehydrogenase [EC:1.1.1.37]	-	-	-
Unigene2780_All	aspartate degradation II	malate dehydrogenase	611	142.719	92.8246	-0.6206				gi|115465579|ref|NP_001056389.1|	159	3e-38	Os05g0574400 [Oryza sativa Japonica Group] >gi|113579940|dbj|BAF18303.1| Os05g0574400 [Oryza sativa Japonica Group]	sp|Q9ZP06|MDHM1_ARATH	152	2e-36	Malate dehydrogenase 1, mitochondrial OS=Arabidopsis thaliana GN=At1g53240 PE=1 SV=1	PM0550	74.7	1e-13	COG0039	Malate/lactate dehydrogenases	K00026	2e-39	159	osa:4339682	malate dehydrogenase [EC:1.1.1.37]	GO:0006007//glucose catabolic process;GO:0006952//defense response;GO:0010038//response to metal ion;GO:0043648//dicarboxylic acid metabolic process;GO:0006970//response to osmotic stress;GO:0009060//aerobic respiration	GO:0016615//malate dehydrogenase activity;GO:0046914//transition metal ion binding	GO:0030312//external encapsulating structure;GO:0009536//plastid;GO:0031410//cytoplasmic vesicle;GO:0005576//extracellular region
Unigene25970_All	aspartate degradation II	malate dehydrogenase	773	0.458	0.3136	-0.546422				gi|115476564|ref|NP_001061878.1|	265	5e-70	Os08g0434300 [Oryza sativa Japonica Group] >gi|113623847|dbj|BAF23792.1| Os08g0434300 [Oryza sativa Japonica Group]	sp|Q9SN86|MDHP_ARATH	228	3e-59	Malate dehydrogenase, chloroplastic OS=Arabidopsis thaliana GN=At3g47520 PE=1 SV=1	VC0432	142	8e-34	COG0039	Malate/lactate dehydrogenases	K00026	3e-71	265	osa:4345657	malate dehydrogenase [EC:1.1.1.37]	-	-	-
Unigene22272_All	aspartate degradation II	malate dehydrogenase	520	230.326	158.243	-0.541532				gi|115438875|ref|NP_001043717.1|	240	7e-63	Os01g0649100 [Oryza sativa Japonica Group] >gi|19880701|gb|AAM00435.1|AF444195_1 malate dehydrogenase [Oryza sativa] >gi|113533248|dbj|BAF05631.1| Os01g0649100 [Oryza sativa Japonica Group]	sp|Q9ZP06|MDHM1_ARATH	203	6e-52	Malate dehydrogenase 1, mitochondrial OS=Arabidopsis thaliana GN=At1g53240 PE=1 SV=1	SPCC306.08c	139	3e-33	COG0039	Malate/lactate dehydrogenases	K00026	5e-65	243	zma:100272900	malate dehydrogenase [EC:1.1.1.37]	GO:0006007//glucose catabolic process;GO:0006952//defense response;GO:0010038//response to metal ion;GO:0043648//dicarboxylic acid metabolic process;GO:0006970//response to osmotic stress;GO:0009060//aerobic respiration	GO:0016615//malate dehydrogenase activity;GO:0046914//transition metal ion binding	GO:0031980//mitochondrial lumen;GO:0030312//external encapsulating structure;GO:0009536//plastid
Unigene20997_All	aspartate degradation II	malate dehydrogenase	701	83.3233	61.5446	-0.437088				gi|115455637|ref|NP_001051419.1|	427	1e-119	Os03g0773800 [Oryza sativa Japonica Group] >gi|113549890|dbj|BAF13333.1| Os03g0773800 [Oryza sativa Japonica Group]	sp|Q42972|MDHG_ORYSJ	404	2e-112	Malate dehydrogenase, glyoxysomal OS=Oryza sativa subsp. japonica GN=Os12g0632700 PE=1 SV=3	YPO3516	247	1e-65	COG0039	Malate/lactate dehydrogenases	K00026	3e-120	427	osa:4334274	malate dehydrogenase [EC:1.1.1.37]	-	-	-
Unigene8973_All	aspartate degradation II	malate dehydrogenase	1461	1007.8	795.143	-0.341921				gi|229358240|gb|ACQ57333.1|	644	0	cytosolic malate dehydrogenase [Triticum aestivum]	sp|Q08062|MDHC_MAIZE	622	2e-177	Malate dehydrogenase, cytoplasmic OS=Zea mays PE=2 SV=2	DR0325	348	1e-95	COG0039	Malate/lactate dehydrogenases	K00025	2e-178	622	zma:542598	malate dehydrogenase [EC:1.1.1.37]	-	-	-
Unigene15926_All	aspartate degradation II	malate dehydrogenase	927	69.2466	56.4758	-0.29411				gi|115465579|ref|NP_001056389.1|	302	5e-81	Os05g0574400 [Oryza sativa Japonica Group] >gi|113579940|dbj|BAF18303.1| Os05g0574400 [Oryza sativa Japonica Group]	sp|Q9ZP06|MDHM1_ARATH	274	7e-73	Malate dehydrogenase 1, mitochondrial OS=Arabidopsis thaliana GN=At1g53240 PE=1 SV=1	PM0550	150	2e-36	COG0039	Malate/lactate dehydrogenases	K00026	3e-82	302	osa:4339682	malate dehydrogenase [EC:1.1.1.37]	-	-	-
Unigene11470_All	aspartate degradation II	malate dehydrogenase	373	121.163	101.044	-0.261966				gi|115438875|ref|NP_001043717.1|	230	3e-60	Os01g0649100 [Oryza sativa Japonica Group] >gi|19880701|gb|AAM00435.1|AF444195_1 malate dehydrogenase [Oryza sativa] >gi|113533248|dbj|BAF05631.1| Os01g0649100 [Oryza sativa Japonica Group]	sp|P17783|MDHM_CITLA	215	6e-56	Malate dehydrogenase, mitochondrial OS=Citrullus lanatus GN=MMDH PE=1 SV=1	VC0432	147	6e-36	COG0039	Malate/lactate dehydrogenases	K00026	2e-61	230	osa:4326249	malate dehydrogenase [EC:1.1.1.37]	-	-	-
Unigene15170_All	aspartate degradation II	malate dehydrogenase	213	82.5441	72.2574	-0.19202				gi|195628708|gb|ACG36184.1|	124	3e-28	malate dehydrogenase [Zea mays]	sp|P83373|MDHM_FRAAN	120	3e-27	Malate dehydrogenase, mitochondrial OS=Fragaria ananassa GN=MMDHI PE=1 SV=1	SPCC306.08c	88.6	2e-18	COG0039	Malate/lactate dehydrogenases	K00026	9e-30	125	zma:100273428	malate dehydrogenase [EC:1.1.1.37]	GO:0006007//glucose catabolic process;GO:0006952//defense response;GO:0043648//dicarboxylic acid metabolic process;GO:0009060//aerobic respiration	GO:0016615//malate dehydrogenase activity;GO:0046914//transition metal ion binding	GO:0031980//mitochondrial lumen;GO:0005576//extracellular region
Unigene4316_All	aspartate degradation II	malate dehydrogenase	561	6.9411	6.4806	-0.0990369				gi|195626292|gb|ACG34976.1|	138	3e-32	malate dehydrogenase [Zea mays]	sp|Q9SN86|MDHP_ARATH	89.4	1e-17	Malate dehydrogenase, chloroplastic OS=Arabidopsis thaliana GN=At3g47520 PE=1 SV=1	YDL078c	58.2	9e-09	COG0039	Malate/lactate dehydrogenases	K00026	8e-33	137	zma:100193663	malate dehydrogenase [EC:1.1.1.37]	-	-	-
Unigene19836_All	aspartate degradation II	malate dehydrogenase	686	83.4251	86.0326	0.0444019				gi|32251039|gb|AAP74365.1|	203	1e-51	glyoxysomal malate dehydrogenase [Triticum aestivum]	sp|Q42972|MDHG_ORYSJ	187	4e-47	Malate dehydrogenase, glyoxysomal OS=Oryza sativa subsp. japonica GN=Os12g0632700 PE=1 SV=3	HI1210	103	2e-22	COG0039	Malate/lactate dehydrogenases	K00026	5e-50	194	sbi:SORBI_08g022770	malate dehydrogenase [EC:1.1.1.37]	-	-	-
Unigene1017_All	aspartate degradation II	malate dehydrogenase	333	21.9698	22.9274	0.061551				gi|224760833|gb|ACN62414.1|	111	3e-24	malate dehydrogenase [Bambusa oldhamii]	sp|Q42972|MDHG_ORYSJ	102	8e-22	Malate dehydrogenase, glyoxysomal OS=Oryza sativa subsp. japonica GN=Os12g0632700 PE=1 SV=3	--	--	--	--	--	K00026	8e-23	102	osa:4352871	malate dehydrogenase [EC:1.1.1.37]	GO:0009060//aerobic respiration;GO:0043648//dicarboxylic acid metabolic process;GO:0006007//glucose catabolic process	GO:0016615//malate dehydrogenase activity	GO:0005777//peroxisome
Unigene16724_All	aspartate degradation II	malate dehydrogenase	1234	48.9592	53.8175	0.136495				gi|3183079|sp|Q42972.3|MDHG_ORYSJ	585	1e-166	RecName: Full=Malate dehydrogenase, glyoxysomal; Flags: Precursor >gi|1375075|dbj|BAA12870.1| glyoxysomal malate dehydrogenase [Oryza sativa Japonica Group]	sp|Q42972|MDHG_ORYSJ	585	2e-166	Malate dehydrogenase, glyoxysomal OS=Oryza sativa subsp. japonica GN=Os12g0632700 PE=1 SV=3	YPO3516	322	1e-87	COG0039	Malate/lactate dehydrogenases	K00026	8e-167	583	osa:4352871	malate dehydrogenase [EC:1.1.1.37]	-	-	-
Unigene4317_All	aspartate degradation II	malate dehydrogenase	875	39.2432	46.3975	0.241604				gi|195626292|gb|ACG34976.1|	298	5e-80	malate dehydrogenase [Zea mays]	sp|Q9SN86|MDHP_ARATH	228	4e-59	Malate dehydrogenase, chloroplastic OS=Arabidopsis thaliana GN=At3g47520 PE=1 SV=1	YKL085w	145	1e-34	COG0039	Malate/lactate dehydrogenases	K00026	1e-80	296	zma:100193663	malate dehydrogenase [EC:1.1.1.37]	-	-	-
Unigene25428_All	aspartate degradation II	malate dehydrogenase	200	31.2698	39.9919	0.354938				gi|260779781|gb|ACX50498.1|	130	6e-30	malate dehydrogenase [Zea mays]	sp|P17783|MDHM_CITLA	127	2e-29	Malate dehydrogenase, mitochondrial OS=Citrullus lanatus GN=MMDH PE=1 SV=1	YPO3516	95.5	2e-20	COG0039	Malate/lactate dehydrogenases	K00026	7e-32	132	zma:100274264	malate dehydrogenase [EC:1.1.1.37]	GO:0009060//aerobic respiration;GO:0043648//dicarboxylic acid metabolic process;GO:0006007//glucose catabolic process	GO:0016615//malate dehydrogenase activity	GO:0031980//mitochondrial lumen
Unigene38280_All	aspartate degradation II	malate dehydrogenase	776	0.6082	1.874	1.6235				gi|115476564|ref|NP_001061878.1|	265	5e-70	Os08g0434300 [Oryza sativa Japonica Group] >gi|113623847|dbj|BAF23792.1| Os08g0434300 [Oryza sativa Japonica Group]	sp|Q9SN86|MDHP_ARATH	228	3e-59	Malate dehydrogenase, chloroplastic OS=Arabidopsis thaliana GN=At3g47520 PE=1 SV=1	VC0432	142	8e-34	COG0039	Malate/lactate dehydrogenases	K00026	3e-71	265	osa:4345657	malate dehydrogenase [EC:1.1.1.37]	-	-	-
Unigene16768_All	Globulin	basic 7s globulin precursor, putative	624	15.8845	7.9626	-0.996308				gi|156186249|gb|ABU55395.1|	352	1e-96	xylanase inhibitor 602OS [Triticum aestivum]	sp|Q8RVH5|7SBG2_SOYBN	66.2	2e-10	Basic 7S globulin 2 OS=Glycine max PE=1 SV=1	DR2133	56.2	4e-08	COG4372	Uncharacterized protein conserved in bacteria with the myosin-like domain	K13171	1e-06	50.4	vvi:100262120	serine/arginine repetitive matrix protein 1	-	-	-
Unigene21741_All	Globulin	12S seed storage globulin	635	133.609	90.6522	-0.559599				gi|171027826|gb|ACB41346.1|	356	1e-97	triticin [Triticum aestivum]	sp|P14812|SSG2_AVESA	103	1e-21	12S seed storage globulin 2 OS=Avena sativa PE=3 SV=1	MA2354	52	8e-07	COG1357	Uncharacterized low-complexity proteins	--	--	--	--	--	-	-	-
Unigene17539_All	Globulin	globulin-1 s allele precursor, putative, expressed	2003	878.72	773.532	-0.183944				gi|228310|prf||1802402A	523	1e-147	globulin 2	sp|P15590|GLB1_MAIZE	294	1e-78	Globulin-1 S allele OS=Zea mays GN=GLB1 PE=1 SV=2	DR2133	57	1e-07	COG4372	Uncharacterized protein conserved in bacteria with the myosin-like domain	--	--	--	--	--	-	-	GO:0031410//cytoplasmic vesicle
Unigene13913_All	Globulin	11S globulin seed storage protein 2	1431	22.3465	20.4943	-0.124826				gi|195626572|gb|ACG35116.1|	614	1e-175	legumin-like protein [Zea mays]	sp|Q9XHP0|11S2_SESIN	123	3e-27	11S globulin seed storage protein 2 OS=Sesamum indicum PE=2 SV=1	YPO2725	55.5	2e-07	COG3501	Uncharacterized protein conserved in bacteria	--	--	--	--	--	-	-	-
Unigene12311_All	Globulin	globulin-1 s allele precursor, putative, expressed	374	1531.78	1436.43	-0.0927233				gi|167004|gb|AAA32936.1|	223	7e-58	embryo globulin [Hordeum vulgare subsp. vulgare] >gi|170696|gb|AAA34269.1| storage protein [Triticum aestivum] >gi|448281|prf||1916404A barley embryo globulin 1	sp|P15590|GLB1_MAIZE	62.8	6e-10	Globulin-1 S allele OS=Zea mays GN=GLB1 PE=1 SV=2	--	--	--	--	--	--	--	--	--	--	-	-	-
Unigene30812_All	Globulin	globulin 2, putative	1490	128.69	121.188	-0.0866635				gi|228310|prf||1802402A	438	1e-122	globulin 2	sp|P15590|GLB1_MAIZE	249	3e-65	Globulin-1 S allele OS=Zea mays GN=GLB1 PE=1 SV=2	DR2133	57	8e-08	COG4372	Uncharacterized protein conserved in bacteria with the myosin-like domain	--	--	--	--	--	GO:0006952//defense response	-	-
Unigene13879_All	Globulin	11S globulin seed storage protein 2	1596	281.172	274.95	-0.0322852				gi|162459030|ref|NP_001105062.1|	630	1e-179	legumin-like protein [Zea mays] >gi|28950668|gb|AAO63266.1| legumin-like protein [Zea mays]	sp|Q9XHP0|11S2_SESIN	125	9e-28	11S globulin seed storage protein 2 OS=Sesamum indicum PE=2 SV=1	DR2133	53.1	1e-06	COG4372	Uncharacterized protein conserved in bacteria with the myosin-like domain	--	--	--	--	--	-	-	-
Unigene447_All	Globulin	embryo globulin	1412	2219.51	2206.18	-0.00868726				gi|167004|gb|AAA32936.1|	540	0	embryo globulin [Hordeum vulgare subsp. vulgare] >gi|170696|gb|AAA34269.1| storage protein [Triticum aestivum] >gi|448281|prf||1916404A barley embryo globulin 1	sp|P15590|GLB1_MAIZE	288	2e-133	Globulin-1 S allele OS=Zea mays GN=GLB1 PE=1 SV=2	DR2417m	39.3	1e-06	COG0595	Predicted hydrolase of the metallo-beta-lactamase superfamily	--	--	--	--	--	-	-	GO:0031410//cytoplasmic vesicle;GO:0043231//intracellular membrane-bounded organelle
Unigene30805_All	Globulin	embryo globulin	564	125.95	130.212	0.0480181				gi|167004|gb|AAA32936.1|	116	1e-25	embryo globulin [Hordeum vulgare subsp. vulgare] >gi|170696|gb|AAA34269.1| storage protein [Triticum aestivum] >gi|448281|prf||1916404A barley embryo globulin 1	--	--	--	--	--	--	--	--	--	--	--	--	--	--	-	-	GO:0031410//cytoplasmic vesicle
Unigene4756_All	Globulin	basic 7s globulin 2 precursor, putative, expressed	1378	9.7619	10.2895	0.075939				gi|115463793|ref|NP_001055496.1|	679	0	Os05g0402900 [Oryza sativa Japonica Group] >gi|113579047|dbj|BAF17410.1| Os05g0402900 [Oryza sativa Japonica Group]	sp|P13917|7SB1_SOYBN	239	4e-62	Basic 7S globulin OS=Glycine max GN=BG PE=1 SV=2	Cgl1939	55.8	9e-16	COG0532	Translation initiation factor 2 (IF-2; GTPase)	--	--	--	--	--	-	-	-
Unigene7215_All	Globulin	12S seed storage globulin 1	640	84.6276	92.2162	0.123892				gi|171027826|gb|ACB41346.1|	381	1e-105	triticin [Triticum aestivum]	sp|P12615|SSG1_AVESA	331	2e-90	12S seed storage globulin 1 OS=Avena sativa PE=2 SV=1	--	--	--	--	--	--	--	--	--	--	-	-	GO:0031410//cytoplasmic vesicle
Unigene1585_All	Globulin	basic 7s globulin 2 precursor, putative, expressed	939	38.7048	56.0122	0.533229				gi|47824814|emb|CAE46330.1|	474	1e-133	xylanase inhibitor [Hordeum vulgare]	sp|Q8RVH5|7SBG2_SOYBN	103	2e-21	Basic 7S globulin 2 OS=Glycine max PE=1 SV=1	DR2133	57.4	3e-08	COG4372	Uncharacterized protein conserved in bacteria with the myosin-like domain	K13171	4e-09	59.7	rcu:RCOM_0733150	serine/arginine repetitive matrix protein 1	GO:0019538//protein metabolic process;GO:0000272//polysaccharide catabolic process	GO:0004175//endopeptidase activity	-
Unigene534_All	Globulin	19 kDa globulin precursor, putative, expressed	955	41.6395	69.5401	0.739892				gi|30421166|gb|AAP31050.1|	455	1e-127	globulin [Hordeum vulgare]	sp|P29835|GL19_ORYSJ	125	4e-28	19 kDa globulin OS=Oryza sativa subsp. japonica GN=Os05g0499100 PE=1 SV=2	--	--	--	--	--	--	--	--	--	--	-	-	-
Unigene41940_All	Globulin	embryo globulin	545	0	0.2224	7.797				gi|167004|gb|AAA32936.1|	113	1e-24	embryo globulin [Hordeum vulgare subsp. vulgare] >gi|170696|gb|AAA34269.1| storage protein [Triticum aestivum] >gi|448281|prf||1916404A barley embryo globulin 1	--	--	--	--	--	--	--	--	--	--	--	--	--	--	-	-	-
Unigene7222_All	Glutelin	glutelin type-A 3 precursor, putative	677	193.993	146.607	-0.404054				gi|171027826|gb|ACB41346.1|	296	1e-79	triticin [Triticum aestivum]	sp|P14614|GLUB4_ORYSJ	224	5e-58	Glutelin type-B 4 OS=Oryza sativa subsp. japonica GN=GLUB4 PE=1 SV=1	--	--	--	--	--	--	--	--	--	--	-	-	GO:0031410//cytoplasmic vesicle
Unigene15180_All	Hordein	avenin-like seed protein	1027	163.384	171.81	0.0725534				gi|145321070|gb|ABP63560.1|	396	1e-109	avenin-like protein [Triticum aestivum] >gi|260600231|gb|ACX46978.1| avenin-like protein s1 [Triticum aestivum] >gi|295853629|gb|ADG45758.1| avenin-like b [Triticum aestivum] >gi|295853631|gb|ADG45759.1| avenin-like b [Triticum aestivum]	sp|Q09114|AVEE_AVESA	110	1e-23	Avenin-E OS=Avena sativa PE=1 SV=1	--	--	--	--	--	--	--	--	--	--	-	-	-
Unigene4840_All	Hordein	Gamma-hordein-1	1099	2063.22	2589.16	0.327589				gi|123464|sp|P17990.1|HOG1_HORVU	446	1e-124	RecName: Full=Gamma-hordein-1; Flags: Precursor >gi|167042|gb|AAA32955.1| gamma-1 hordein precursor [Hordeum vulgare]	sp|P17990|HOG1_HORVU	446	1e-124	Gamma-hordein-1 OS=Hordeum vulgare PE=2 SV=1	STM0960	84	4e-16	COG1674	DNA segregation ATPase FtsK/SpoIIIE and related proteins	--	--	--	--	--	-	-	-
Unigene8530_All	Hordein	B1 hordein	918	2968.88	4460.31	0.587227				gi|809031|emb|CAA60681.1|	449	1e-125	B1 hordein [Hordeum vulgare] >gi|225171|prf||1210226A hordein B1	sp|P06471|HOR3_HORVU	444	5e-124	B3-hordein (Fragment) OS=Hordeum vulgare PE=1 SV=1	STM0960	65.5	1e-10	COG1674	DNA segregation ATPase FtsK/SpoIIIE and related proteins	--	--	--	--	--	-	-	-
Unigene6984_All	Hordein	avenin-like seed protein	545	315.675	515.214	0.706732				gi|281335542|gb|ADA62374.1|	191	5e-48	gliadin/avenin-like seed protein [Triticum aestivum]	sp|P80356|AVE3_AVESA	84	5e-16	Avenin-3 OS=Avena sativa PE=1 SV=1	--	--	--	--	--	--	--	--	--	--	-	-	-
Unigene37975_All	Hordein	hordein B	897	2015.98	3407.44	0.757203				gi|224385|prf||1103203A	441	1e-123	hordein B	sp|P06471|HOR3_HORVU	440	7e-123	B3-hordein (Fragment) OS=Hordeum vulgare PE=1 SV=1	STM0960	56.6	6e-08	COG1674	DNA segregation ATPase FtsK/SpoIIIE and related proteins	K03295	5e-08	55.8	ath:AT2G04620	cation efflux system protein, CDF family	-	-	-
Unigene355_All	isoleucine biosynthesis I	acetolactate synthase	1575	22.2513	12.3881	-0.844935				gi|226494640|ref|NP_001151166.1|	704	0	acetolactate synthase/ amino acid binding protein [Zea mays] >gi|195644738|gb|ACG41837.1| acetolactate synthase/ amino acid binding protein [Zea mays]	sp|Q9TLY1|ILVH_CYACA	186	3e-46	Acetolactate synthase small subunit OS=Cyanidium caldarium GN=ilvH PE=3 SV=1	sll0065	179	9e-45	COG0440	Acetolactate synthase, small (regulatory) subunit	--	--	--	--	--	-	-	-
Unigene14733_All	isoleucine biosynthesis I	acetolactate synthase activity	1322	109.252	63.5272	-0.782213				gi|28912434|gb|AAO53548.1|	870	0	acetohydroxyacid synthase [Triticum aestivum]	sp|Q6K2E8|ILVB1_ORYSJ	812	0	Acetolactate synthase 1, chloroplastic OS=Oryza sativa subsp. japonica GN=ALS1 PE=2 SV=1	aq_451	419	7e-117	COG0028	Thiamine pyrophosphate-requiring enzymes [acetolactate synthase, pyruvate dehydrogenase (cytochrome), glyoxylate carboligase, phosphonopyruvate decarboxylase]	K01652	0	812	osa:4329450	acetolactate synthase I/II/III large subunit [EC:2.2.1.6]	-	-	-
Unigene27594_All	isoleucine biosynthesis I	ketol-acid reductoisomerase	391	4.225	2.4795	-0.768902				gi|226887786|pdb|3FR7|A	62.8	1e-09	Chain A, Ketol-Acid Reductoisomerase (Kari) In Complex With Mg2+ >gi|226887787|pdb|3FR7|B Chain B, Ketol-Acid Reductoisomerase (Kari) In Complex With Mg2+ >gi|226887789|pdb|3FR8|A Chain A, Rice Ketolacid Reductoisomerase In Complex With Mg2+-Nadph >gi|226887790|pdb|3FR8|B Chain B, Rice Ketolacid Reductoisomerase In Complex With Mg2+-Nadph	sp|Q65XK0|ILV5_ORYSJ	62.8	7e-10	Ketol-acid reductoisomerase, chloroplastic OS=Oryza sativa subsp. japonica GN=Os05g0573700 PE=1 SV=1	--	--	--	--	--	K00053	2e-11	64.7	zma:100382989	ketol-acid reductoisomerase [EC:1.1.1.86]	GO:0008152//metabolic process	GO:0042802//identical protein binding;GO:0046872//metal ion binding;GO:0050661//NADP or NADPH binding;GO:0003824//catalytic activity	GO:0043231//intracellular membrane-bounded organelle
Unigene3762_All	isoleucine biosynthesis I	ketol-acid reductoisomerase	266	369.968	240.553	-0.621045				gi|226887786|pdb|3FR7|A	168	2e-41	Chain A, Ketol-Acid Reductoisomerase (Kari) In Complex With Mg2+ >gi|226887787|pdb|3FR7|B Chain B, Ketol-Acid Reductoisomerase (Kari) In Complex With Mg2+ >gi|226887789|pdb|3FR8|A Chain A, Rice Ketolacid Reductoisomerase In Complex With Mg2+-Nadph >gi|226887790|pdb|3FR8|B Chain B, Rice Ketolacid Reductoisomerase In Complex With Mg2+-Nadph	sp|Q65XK0|ILV5_ORYSJ	168	1e-41	Ketol-acid reductoisomerase, chloroplastic OS=Oryza sativa subsp. japonica GN=Os05g0573700 PE=1 SV=1	YLR355c	63.9	7e-11	COG0059	Ketol-acid reductoisomerase	K00053	7e-43	169	zma:100382989	ketol-acid reductoisomerase [EC:1.1.1.86]	-	-	-
Unigene24619_All	isoleucine biosynthesis I	acetolactate synthase	762	173.127	135.024	-0.358619				gi|3075507|gb|AAC14572.1|	317	8e-86	acetohydroxyacid synthase [Hordeum vulgare]	sp|Q6K2E8|ILVB1_ORYSJ	306	8e-83	Acetolactate synthase 1, chloroplastic OS=Oryza sativa subsp. japonica GN=ALS1 PE=2 SV=1	ZilvG	136	4e-32	COG0028	Thiamine pyrophosphate-requiring enzymes [acetolactate synthase, pyruvate dehydrogenase (cytochrome), glyoxylate carboligase, phosphonopyruvate decarboxylase]	K01652	1e-83	306	osa:4329450	acetolactate synthase I/II/III large subunit [EC:2.2.1.6]	-	-	-
Unigene23810_All	isoleucine biosynthesis I	ketol-acid reductoisomerase	1075	402.076	352.29	-0.190705				gi|226887786|pdb|3FR7|A	427	1e-118	Chain A, Ketol-Acid Reductoisomerase (Kari) In Complex With Mg2+ >gi|226887787|pdb|3FR7|B Chain B, Ketol-Acid Reductoisomerase (Kari) In Complex With Mg2+ >gi|226887789|pdb|3FR8|A Chain A, Rice Ketolacid Reductoisomerase In Complex With Mg2+-Nadph >gi|226887790|pdb|3FR8|B Chain B, Rice Ketolacid Reductoisomerase In Complex With Mg2+-Nadph	sp|Q65XK0|ILV5_ORYSJ	427	7e-119	Ketol-acid reductoisomerase, chloroplastic OS=Oryza sativa subsp. japonica GN=Os05g0573700 PE=1 SV=1	YLR355c	61.6	2e-09	COG0059	Ketol-acid reductoisomerase	K00053	8e-120	427	osa:4339677	ketol-acid reductoisomerase [EC:1.1.1.86]	-	-	-
Unigene18105_All	isoleucine biosynthesis I	ketol-acid reductoisomerase	669	290.677	254.693	-0.190655				gi|115465569|ref|NP_001056384.1|	295	2e-79	Os05g0573700 [Oryza sativa Japonica Group] >gi|75115272|sp|Q65XK0.1|ILV5_ORYSJ RecName: Full=Ketol-acid reductoisomerase, chloroplastic; AltName: Full=Acetohydroxy-acid reductoisomerase; AltName: Full=Alpha-keto-beta-hydroxylacil reductoisomerase; AltName: Full=Protein KARI; Flags: Precursor >gi|113579935|dbj|BAF18298.1| Os05g0573700 [Oryza sativa Japonica Group]	sp|Q65XK0|ILV5_ORYSJ	295	1e-79	Ketol-acid reductoisomerase, chloroplastic OS=Oryza sativa subsp. japonica GN=Os05g0573700 PE=1 SV=1	Rv3876	65.1	1e-10	COG0455	ATPases involved in chromosome partitioning	K00053	2e-80	295	osa:4339677	ketol-acid reductoisomerase [EC:1.1.1.86]	-	-	-
Unigene20268_All	isoleucine biosynthesis I	acetolactate synthase activity	501	19.7843	17.9	-0.144396				gi|195647708|gb|ACG43322.1|	295	2e-79	2-hydroxyphytanoyl-CoA lyase [Zea mays]	sp|Q9LF46|HACL_ARATH	233	6e-61	2-hydroxyacyl-CoA lyase OS=Arabidopsis thaliana GN=HACL PE=2 SV=1	yfdU	160	8e-40	COG0028	Thiamine pyrophosphate-requiring enzymes [acetolactate synthase, pyruvate dehydrogenase (cytochrome), glyoxylate carboligase, phosphonopyruvate decarboxylase]	K12261	2e-81	298	sbi:SORBI_03g004100	2-hydroxyacyl-CoA lyase 1 [EC:4.1.-.-]	-	-	-
Unigene10325_All	isoleucine biosynthesis I	ketol-acid reductoisomerase	264	375.452	381.466	0.0229237				gi|297817174|ref|XP_002876470.1|	174	3e-43	ketol-acid reductoisomerase [Arabidopsis lyrata subsp. lyrata] >gi|297322308|gb|EFH52729.1| ketol-acid reductoisomerase [Arabidopsis lyrata subsp. lyrata]	sp|Q65XK0|ILV5_ORYSJ	174	2e-43	Ketol-acid reductoisomerase, chloroplastic OS=Oryza sativa subsp. japonica GN=Os05g0573700 PE=1 SV=1	TM0550	54.7	4e-08	COG0059	Ketol-acid reductoisomerase	K00053	1e-44	175	sbi:SORBI_03g029720	ketol-acid reductoisomerase [EC:1.1.1.86]	-	-	-
Unigene45209_All	isoleucine biosynthesis I	acetolactate synthase activity	689	3.7678	6.332	0.748939				gi|195647708|gb|ACG43322.1|	262	2e-69	2-hydroxyphytanoyl-CoA lyase [Zea mays]	sp|Q9LF46|HACL_ARATH	239	2e-62	2-hydroxyacyl-CoA lyase OS=Arabidopsis thaliana GN=HACL PE=2 SV=1	yfdU	125	5e-29	COG0028	Thiamine pyrophosphate-requiring enzymes [acetolactate synthase, pyruvate dehydrogenase (cytochrome), glyoxylate carboligase, phosphonopyruvate decarboxylase]	K12261	6e-71	264	sbi:SORBI_03g004100	2-hydroxyacyl-CoA lyase 1 [EC:4.1.-.-]	-	GO:0046872//metal ion binding;GO:0016831//carboxy-lyase activity;GO:0019842//vitamin binding	-
Unigene28045_All	isoleucine biosynthesis I and degradation I	branched-chain-amino-acid transaminase	362	4.5635	1.3391	-1.76888				gi|115445503|ref|NP_001046531.1|	209	8e-54	Os02g0273100 [Oryza sativa Japonica Group] >gi|113536062|dbj|BAF08445.1| Os02g0273100 [Oryza sativa Japonica Group]	sp|Q8L493|BCAL3_ARATH	155	6e-38	Branched-chain-amino-acid aminotransferase-like protein 3, chloroplastic OS=Arabidopsis thaliana GN=At5g57850 PE=2 SV=1	MK1627	58.2	4e-09	COG0115	Branched-chain amino acid aminotransferase/4-amino-4-deoxychorismate lyase	K00826	5e-43	169	rcu:RCOM_0802810	branched-chain amino acid aminotransferase [EC:2.6.1.42]	GO:0009396//folic acid and derivative biosynthetic process	GO:0016833//oxo-acid-lyase activity;GO:0008483//transaminase activity	GO:0009536//plastid
Unigene4787_All	isoleucine biosynthesis I and degradation I	branched-chain-amino-acid transaminase	1529	20.9142	11.7304	-0.834231				gi|115465391|ref|NP_001056295.1|	683	0	Os05g0558400 [Oryza sativa Japonica Group] >gi|113579846|dbj|BAF18209.1| Os05g0558400 [Oryza sativa Japonica Group]	sp|Q9FYA6|BCAT5_ARATH	542	2e-153	Branched-chain-amino-acid aminotransferase 5, chloroplastic OS=Arabidopsis thaliana GN=BCAT5 PE=1 SV=1	BS_ywaA	286	9e-77	COG0115	Branched-chain amino acid aminotransferase/4-amino-4-deoxychorismate lyase	K00826	0	683	osa:4339583	branched-chain amino acid aminotransferase [EC:2.6.1.42]	-	-	-
Unigene9763_All	isoleucine biosynthesis I and degradation I	branched-chain-amino-acid transaminase	997	9.9418	5.5914	-0.830298				gi|226494740|ref|NP_001150217.1|	444	1e-124	LOC100283847 [Zea mays] >gi|195637620|gb|ACG38278.1| aminotransferase, class IV family protein [Zea mays]	sp|Q9ASR4|BCAL2_ARATH	377	5e-104	Branched-chain-amino-acid aminotransferase-like protein 2 OS=Arabidopsis thaliana GN=At5g27410 PE=2 SV=1	MK1627	174	2e-43	COG0115	Branched-chain amino acid aminotransferase/4-amino-4-deoxychorismate lyase	K00826	4e-12	69.7	pop:POPTR_578099	branched-chain amino acid aminotransferase [EC:2.6.1.42]	GO:0006520//cellular amino acid metabolic process	GO:0008483//transaminase activity	-
Unigene27879_All	isoleucine biosynthesis I and degradation I	branched-chain-amino-acid transaminase	318	3.3396	2.2866	-0.546471				gi|195638052|gb|ACG38494.1|	204	3e-52	branched-chain-amino-acid aminotransferase [Zea mays]	sp|Q9FYA6|BCAT5_ARATH	180	3e-45	Branched-chain-amino-acid aminotransferase 5, chloroplastic OS=Arabidopsis thaliana GN=BCAT5 PE=1 SV=1	SPy0911	112	2e-25	COG0115	Branched-chain amino acid aminotransferase/4-amino-4-deoxychorismate lyase	K00826	1e-53	204	zma:100192912	branched-chain amino acid aminotransferase [EC:2.6.1.42]	GO:0006520//cellular amino acid metabolic process	GO:0008483//transaminase activity	GO:0009536//plastid
Unigene6745_All	isoleucine biosynthesis I and degradation I	branched-chain-amino-acid transaminase	304	5.046	3.5878	-0.492041				gi|115445503|ref|NP_001046531.1|	117	5e-26	Os02g0273100 [Oryza sativa Japonica Group] >gi|113536062|dbj|BAF08445.1| Os02g0273100 [Oryza sativa Japonica Group]	sp|Q8L493|BCAL3_ARATH	100	4e-21	Branched-chain-amino-acid aminotransferase-like protein 3, chloroplastic OS=Arabidopsis thaliana GN=At5g57850 PE=2 SV=1	--	--	--	--	--	K00826	5e-23	103	vvi:100266456	branched-chain amino acid aminotransferase [EC:2.6.1.42]	GO:0009396//folic acid and derivative biosynthetic process	GO:0016833//oxo-acid-lyase activity;GO:0008483//transaminase activity	GO:0009536//plastid
Unigene11701_All	isoleucine biosynthesis I and degradation I	branched-chain-amino-acid transaminase	522	80.9267	66.1657	-0.290532				gi|115435558|ref|NP_001042537.1|	122	2e-27	Os01g0238500 [Oryza sativa Japonica Group] >gi|56784110|dbj|BAD81481.1| branched-chain amino acid aminotransferase -like [Oryza sativa Japonica Group] >gi|113532068|dbj|BAF04451.1| Os01g0238500 [Oryza sativa Japonica Group]	sp|Q8L493|BCAL3_ARATH	72.8	1e-12	Branched-chain-amino-acid aminotransferase-like protein 3, chloroplastic OS=Arabidopsis thaliana GN=At5g57850 PE=2 SV=1	--	--	--	--	--	K00826	4e-30	127	zma:100192017	branched-chain amino acid aminotransferase [EC:2.6.1.42]	-	-
Unigene6700_All	isoleucine biosynthesis I and degradation I	branched-chain-amino-acid transaminase	955	108.979	93.1432	-0.226533				gi|115435558|ref|NP_001042537.1|	480	1e-134	Os01g0238500 [Oryza sativa Japonica Group] >gi|56784110|dbj|BAD81481.1| branched-chain amino acid aminotransferase -like [Oryza sativa Japonica Group] >gi|113532068|dbj|BAF04451.1| Os01g0238500 [Oryza sativa Japonica Group]	sp|Q8L493|BCAL3_ARATH	300	1e-80	Branched-chain-amino-acid aminotransferase-like protein 3, chloroplastic OS=Arabidopsis thaliana GN=At5g57850 PE=2 SV=1	MK1627	102	7e-22	COG0115	Branched-chain amino acid aminotransferase/4-amino-4-deoxychorismate lyase	K00826	1e-104	377	sbi:SORBI_09g008180	branched-chain amino acid aminotransferase [EC:2.6.1.42]	GO:0009396//folic acid and derivative biosynthetic process	GO:0016833//oxo-acid-lyase activity;GO:0008483//transaminase activity	GO:0009536//plastid
Unigene1002_All	isoleucine biosynthesis I and degradation I	branched-chain-amino-acid transaminase	574	5.7561	5.4893	-0.0684695				gi|115450169|ref|NP_001048685.1|	265	2e-70	Os03g0106400 [Oryza sativa Japonica Group] >gi|113547156|dbj|BAF10599.1| Os03g0106400 [Oryza sativa Japonica Group]	sp|Q9FYA6|BCAT5_ARATH	236	9e-62	Branched-chain-amino-acid aminotransferase 5, chloroplastic OS=Arabidopsis thaliana GN=BCAT5 PE=1 SV=1	SA0512	149	4e-36	COG0115	Branched-chain amino acid aminotransferase/4-amino-4-deoxychorismate lyase	K00826	2e-71	265	osa:4331322	branched-chain amino acid aminotransferase [EC:2.6.1.42]	GO:0006520//cellular amino acid metabolic process	GO:0008483//transaminase activity	GO:0009536//plastid
Unigene2594_All	isoleucine biosynthesis I and degradation I	branched-chain-amino-acid transaminase	379	3.4248	3.5173	0.0384487				gi|66346995|emb|CAE00460.2|	219	1e-56	branched-chain amino acid aminotransferase [Hordeum vulgare subsp. vulgare]	sp|Q9LPM9|BCAT6_ARATH	135	8e-32	Branched-chain-amino-acid aminotransferase 6 OS=Arabidopsis thaliana GN=BCAT6 PE=1 SV=1	SA0512	92	2e-19	COG0115	Branched-chain amino acid aminotransferase/4-amino-4-deoxychorismate lyase	K00826	3e-46	180	osa:4332151	branched-chain amino acid aminotransferase [EC:2.6.1.42]	GO:0006520//cellular amino acid metabolic process	GO:0008483//transaminase activity	-
Unigene29205_All	isoleucine degradation I	2-oxoisovalerate dehydrogenase alpha subunit, mitochondrial precursor, putative, expressed	253	5.5968	0.958	-2.5465				gi|283806367|dbj|BAI66425.1|	160	5e-39	2-oxoisovalerate dehydrogenase [Triticum aestivum]	sp|A5A6H9|ODBA_PANTR	60.5	3e-09	2-oxoisovalerate dehydrogenase subunit alpha, mitochondrial OS=Pan troglodytes GN=BCKDHA PE=2 SV=1	--	--	--	--	--	K00166	7e-35	142	zma:100191513	2-oxoisovalerate dehydrogenase E1 component, alpha subunit [EC:1.2.4.4]	-	-	-
Unigene35291_All	isoleucine degradation I	enoyl-CoA hydratase activity	383	3.389	0.6328	-2.42104				gi|115439009|ref|NP_001043784.1|	239	5e-63	Os01g0662700 [Oryza sativa Japonica Group] >gi|113533315|dbj|BAF05698.1| Os01g0662700 [Oryza sativa Japonica Group]	sp|Q8GYN9|MENB_ARATH	219	6e-57	1,4-Dihydroxy-2-naphthoyl-CoA synthase, peroxisomal OS=Arabidopsis thaliana GN=MENB PE=1 SV=2	PM1096	169	1e-42	COG0447	Dihydroxynaphthoic acid synthase	K01661	8e-65	242	zma:100304279	naphthoate synthase [EC:4.1.3.36]	GO:0042362//fat-soluble vitamin biosynthetic process;GO:0009233	GO:0016833//oxo-acid-lyase activity	GO:0042579//microbody
Unigene461_All	isoleucine degradation I	enoyl-CoA hydratase	264	16.9847	5.9676	-1.50901				gi|226510010|ref|NP_001148087.1|	155	1e-37	LOC100281695 [Zea mays] >gi|195615714|gb|ACG29687.1| peroxisomal fatty acid beta-oxidation multifunctional protein [Zea mays]	sp|Q8W1L6|MFP_ORYSJ	155	8e-38	Peroxisomal fatty acid beta-oxidation multifunctional protein OS=Oryza sativa subsp. japonica GN=MFP PE=1 SV=2	SMb21632	56.6	1e-08	COG1250	3-hydroxyacyl-CoA dehydrogenase	K10527	8e-39	155	osa:4328997	enoyl-CoA hydratase/3-hydroxyacyl-CoA dehydrogenase [EC:4.2.1.17 1.1.1.35 1.1.1.211]	GO:0009062//fatty acid catabolic process;GO:0009791//post-embryonic development	GO:0016863//intramolecular oxidoreductase activity, transposing C=C bonds;GO:0016616//oxidoreductase activity, acting on the CH-OH group of donors, NAD or NADP as acceptor;GO:0048037//cofactor binding;GO:0016836//hydro-lyase activity;GO:0016856	GO:0030312//external encapsulating structure;GO:0005777//peroxisome;GO:0009536//plastid
Unigene31910_All	isoleucine degradation I	acetyl-CoA C-acyltransferase activity	426	3.8779	1.4224	-1.44695				gi|53854350|gb|AAU95618.1|	162	9e-40	cytosolic acetoacetyl-coenzyme A thiolase [Nicotiana tabacum]	sp|Q12598|THIA_CANTR	152	5e-37	Acetyl-CoA acetyltransferase IA OS=Candida tropicalis GN=PACTA PE=1 SV=3	SPBC215.09c	148	3e-36	COG0183	Acetyl-CoA acetyltransferase	K00626	7e-39	156	ppp:PHYPADRAFT_218604	acetyl-CoA C-acetyltransferase [EC:2.3.1.9]	-	-	-
Unigene26790_All	isoleucine degradation I	enoyl-CoA hydratase	261	3.1647	1.393	-1.18387				gi|115436430|ref|NP_001042973.1|	122	2e-27	Os01g0348600 [Oryza sativa Japonica Group] >gi|113532504|dbj|BAF04887.1| Os01g0348600 [Oryza sativa Japonica Group]	sp|Q39659|MFPA_CUCSA	115	7e-26	Glyoxysomal fatty acid beta-oxidation multifunctional protein MFP-a OS=Cucumis sativus PE=1 SV=1	PA3014_2	57.8	5e-09	COG1250	3-hydroxyacyl-CoA dehydrogenase	K10527	1e-28	122	osa:4326503	enoyl-CoA hydratase/3-hydroxyacyl-CoA dehydrogenase [EC:4.2.1.17 1.1.1.35 1.1.1.211]	GO:0009062//fatty acid catabolic process	GO:0016856;GO:0016491//oxidoreductase activity;GO:0016863//intramolecular oxidoreductase activity, transposing C=C bonds;GO:0048037//cofactor binding;GO:0016836//hydro-lyase activity	GO:0005777//peroxisome
Unigene9265_All	isoleucine degradation I	enoyl-CoA hydratase	651	3.2627	1.6754	-0.961561				gi|115436430|ref|NP_001042973.1|	304	5e-82	Os01g0348600 [Oryza sativa Japonica Group] >gi|113532504|dbj|BAF04887.1| Os01g0348600 [Oryza sativa Japonica Group]	sp|O49809|MFPA_BRANA	273	5e-73	Glyoxysomal fatty acid beta-oxidation multifunctional protein MFP-a OS=Brassica napus PE=2 SV=2	RSc1759_1	137	1e-32	COG1024	Enoyl-CoA hydratase/carnithine racemase	K10527	4e-83	304	osa:4326503	enoyl-CoA hydratase/3-hydroxyacyl-CoA dehydrogenase [EC:4.2.1.17 1.1.1.35 1.1.1.211]	-	-	-
Unigene7582_All	isoleucine degradation I	enoyl-CoA hydratase	465	2.0301	1.0425	-0.961503				gi|115440471|ref|NP_001044515.1|	212	1e-54	Os01g0796400 [Oryza sativa Japonica Group] >gi|113534046|dbj|BAF06429.1| Os01g0796400 [Oryza sativa Japonica Group]	sp|Q45223|HBD_BRAJA	117	3e-26	3-hydroxybutyryl-CoA dehydrogenase OS=Bradyrhizobium japonicum GN=hbdA PE=3 SV=1	BMEI0099	127	8e-30	COG1250	3-hydroxyacyl-CoA dehydrogenase	K00074	1e-55	212	osa:4325632	3-hydroxybutyryl-CoA dehydrogenase [EC:1.1.1.157]	GO:0032787	GO:0016616//oxidoreductase activity, acting on the CH-OH group of donors, NAD or NADP as acceptor;GO:0048037//cofactor binding	GO:0042579//microbody
Unigene19259_All	isoleucine degradation I	enoyl-CoA hydratase	576	5.1215	2.7351	-0.904973				gi|115488084|ref|NP_001066529.1|	253	8e-67	Os12g0264500 [Oryza sativa Japonica Group] >gi|113649036|dbj|BAF29548.1| Os12g0264500 [Oryza sativa Japonica Group]	sp|Q9LKJ1|HIBC1_ARATH	209	1e-53	3-hydroxyisobutyryl-CoA hydrolase 1 OS=Arabidopsis thaliana GN=CHY1 PE=1 SV=1	SPBC2D10.09	137	1e-32	COG1024	Enoyl-CoA hydratase/carnithine racemase	K05605	2e-69	258	sbi:SORBI_01g028410	3-hydroxyisobutyryl-CoA hydrolase [EC:3.1.2.4]	GO:0009062//fatty acid catabolic process;GO:0009725//response to hormone stimulus;GO:0006950//response to stress;GO:0006573//valine metabolic process	GO:0016289//CoA hydrolase activity;GO:0016836//hydro-lyase activity	-
Unigene18756_All	isoleucine degradation I	enoyl-CoA hydratase	429	10.7272	5.9323	-0.85461				gi|115436430|ref|NP_001042973.1|	264	2e-70	Os01g0348600 [Oryza sativa Japonica Group] >gi|113532504|dbj|BAF04887.1| Os01g0348600 [Oryza sativa Japonica Group]	sp|Q39659|MFPA_CUCSA	207	2e-53	Glyoxysomal fatty acid beta-oxidation multifunctional protein MFP-a OS=Cucumis sativus PE=1 SV=1	mll4199_1	48.9	3e-06	COG1024	Enoyl-CoA hydratase/carnithine racemase	K10527	2e-71	264	osa:4326503	enoyl-CoA hydratase/3-hydroxyacyl-CoA dehydrogenase [EC:4.2.1.17 1.1.1.35 1.1.1.211]	-	-	-
Unigene12744_All	isoleucine degradation I	enoyl-CoA hydratase	1523	25.1029	14.482	-0.793593				gi|33338559|gb|AAQ13901.1|	630	1e-179	multifunctional protein [Oryza sativa]	sp|Q8W1L6|MFP_ORYSJ	630	8e-180	Peroxisomal fatty acid beta-oxidation multifunctional protein OS=Oryza sativa subsp. japonica GN=MFP PE=1 SV=2	CC3189_2	241	3e-63	COG1250	3-hydroxyacyl-CoA dehydrogenase	K10527	1e-180	630	osa:4328997	enoyl-CoA hydratase/3-hydroxyacyl-CoA dehydrogenase [EC:4.2.1.17 1.1.1.35 1.1.1.211]	-	-	-
Unigene490_All	isoleucine degradation I	2-oxoisovalerate dehydrogenase beta subunit, mitochondrial precursor, putative, expressed	980	30.4631	17.8072	-0.774602				gi|195625634|gb|ACG34647.1|	498	1e-140	pyruvate dehydrogenase E1 component subunit beta [Zea mays]	sp|Q38799|ODPB_ARATH	432	2e-120	Pyruvate dehydrogenase E1 component subunit beta, mitochondrial OS=Arabidopsis thaliana GN=PDH2 PE=1 SV=2	YBR221c	319	4e-87	COG0022	Pyruvate/2-oxoglutarate dehydrogenase complex, dehydrogenase (E1) component, eukaryotic type, beta subunit	K00162	1e-140	496	zma:542607	pyruvate dehydrogenase E1 component subunit beta [EC:1.2.4.1]	-	-	-
Unigene21630_All	isoleucine degradation I	acetyl-CoA C-acyltransferase activity	1702	30.0891	17.6584	-0.768886				gi|115482342|ref|NP_001064764.1|	793	0	Os10g0457600 [Oryza sativa Japonica Group] >gi|113639373|dbj|BAF26678.1| Os10g0457600 [Oryza sativa Japonica Group]	sp|Q56WD9|THIK2_ARATH	701	0	3-ketoacyl-CoA thiolase 2, peroxisomal OS=Arabidopsis thaliana GN=PED1 PE=1 SV=2	BS_yusK	342	9e-94	COG0183	Acetyl-CoA acetyltransferase	K07513	0	808	sbi:SORBI_01g020150	acetyl-CoA acyltransferase 1 [EC:2.3.1.16]	-	-	-
Unigene462_All	isoleucine degradation I	enoyl-CoA hydratase	825	10.0121	6.1696	-0.698496				gi|33338559|gb|AAQ13901.1|	491	1e-138	multifunctional protein [Oryza sativa]	sp|Q8W1L6|MFP_ORYSJ	489	1e-137	Peroxisomal fatty acid beta-oxidation multifunctional protein OS=Oryza sativa subsp. japonica GN=MFP PE=1 SV=2	RSc1759_1	160	2e-39	COG1024	Enoyl-CoA hydratase/carnithine racemase	K10527	2e-138	489	osa:4328997	enoyl-CoA hydratase/3-hydroxyacyl-CoA dehydrogenase [EC:4.2.1.17 1.1.1.35 1.1.1.211]	GO:0032787	GO:0003824//catalytic activity;GO:0048037//cofactor binding	-
Unigene657_All	isoleucine degradation I	2-oxoisovalerate dehydrogenase alpha subunit, mitochondrial precursor, putative, expressed	1047	81.7091	51.2761	-0.67221				gi|115448577|ref|NP_001048068.1|	629	1e-179	Os02g0739600 [Oryza sativa Japonica Group] >gi|113537599|dbj|BAF09982.1| Os02g0739600 [Oryza sativa Japonica Group]	sp|P52901|ODPA1_ARATH	561	4e-159	Pyruvate dehydrogenase E1 component subunit alpha-1, mitochondrial OS=Arabidopsis thaliana GN=At1g59900 PE=1 SV=2	YER178w	350	3e-96	COG1071	Pyruvate/2-oxoglutarate dehydrogenase complex, dehydrogenase (E1) component, eukaryotic type, alpha subunit	K00161	1e-180	629	osa:4330673	pyruvate dehydrogenase E1 component subunit alpha [EC:1.2.4.1]	-	-	-
Unigene23228_All	isoleucine degradation I	acetyl-CoA C-acyltransferase activity	1318	156.586	101.787	-0.62141				gi|283806363|dbj|BAI66423.1|	651	0	3-ketoacyl-CoA thiolase-like protein [Triticum aestivum]	sp|Q56WD9|THIK2_ARATH	546	1e-154	3-ketoacyl-CoA thiolase 2, peroxisomal OS=Arabidopsis thaliana GN=PED1 PE=1 SV=2	BS_yusK	310	5e-84	COG0183	Acetyl-CoA acetyltransferase	K07513	5e-175	611	zma:100192501	acetyl-CoA acyltransferase 1 [EC:2.3.1.16]	-	GO:0016747//transferase activity, transferring acyl groups other than amino-acyl groups	-
Unigene31175_All	isoleucine degradation I	2-oxoisovalerate dehydrogenase beta subunit, mitochondrial precursor, putative, expressed	642	34.9219	23.0294	-0.600655				gi|115477529|ref|NP_001062360.1|	197	8e-50	Os08g0536000 [Oryza sativa Japonica Group] >gi|113624329|dbj|BAF24274.1| Os08g0536000 [Oryza sativa Japonica Group]	sp|Q38799|ODPB_ARATH	179	1e-44	Pyruvate dehydrogenase E1 component subunit beta, mitochondrial OS=Arabidopsis thaliana GN=PDH2 PE=1 SV=2	SMc01031_2	122	6e-28	COG0022	Pyruvate/2-oxoglutarate dehydrogenase complex, dehydrogenase (E1) component, eukaryotic type, beta subunit	K00162	7e-51	197	osa:4346159	pyruvate dehydrogenase E1 component subunit beta [EC:1.2.4.1]	-	-	-
Unigene6922_All	isoleucine degradation I	2-oxoisovalerate dehydrogenase alpha subunit, mitochondrial precursor, putative, expressed	1706	3.3892	2.3442	-0.531849				gi|283806367|dbj|BAI66425.1|	639	0	2-oxoisovalerate dehydrogenase [Triticum aestivum]	sp|Q54M22|ODBA_DICDI	365	4e-100	2-oxoisovalerate dehydrogenase subunit alpha, mitochondrial OS=Dictyostelium discoideum GN=bkdA PE=3 SV=1	TVN0102	234	3e-61	COG1071	Pyruvate/2-oxoglutarate dehydrogenase complex, dehydrogenase (E1) component, eukaryotic type, alpha subunit	K00166	9e-170	594	osa:4351684	2-oxoisovalerate dehydrogenase E1 component, alpha subunit [EC:1.2.4.4]	-	GO:0016903//oxidoreductase activity, acting on the aldehyde or oxo group of donors	-
Unigene13963_All	isoleucine degradation I	2-oxoisovalerate dehydrogenase beta subunit, mitochondrial precursor, putative, expressed	1361	20.4613	14.1578	-0.531301				gi|115470781|ref|NP_001058989.1|	651	0	Os07g0170100 [Oryza sativa Japonica Group] >gi|113610525|dbj|BAF20903.1| Os07g0170100 [Oryza sativa Japonica Group]	sp|Q55FN7|ODBB_DICDI	462	3e-129	2-oxoisovalerate dehydrogenase subunit beta, mitochondrial OS=Dictyostelium discoideum GN=bkdB PE=3 SV=1	DR0030	327	3e-89	COG0022	Pyruvate/2-oxoglutarate dehydrogenase complex, dehydrogenase (E1) component, eukaryotic type, beta subunit	K00167	0	651	osa:4342508	2-oxoisovalerate dehydrogenase E1 component, beta subunit [EC:1.2.4.4]	-	-	-
Unigene17103_All	isoleucine degradation I	enoyl-CoA hydratase activity	1531	20.3474	14.1689	-0.522117				gi|115436430|ref|NP_001042973.1|	745	0	Os01g0348600 [Oryza sativa Japonica Group] >gi|113532504|dbj|BAF04887.1| Os01g0348600 [Oryza sativa Japonica Group]	sp|O49809|MFPA_BRANA	642	0	Glyoxysomal fatty acid beta-oxidation multifunctional protein MFP-a OS=Brassica napus PE=2 SV=2	RSc1759_2	260	5e-69	COG1250	3-hydroxyacyl-CoA dehydrogenase	K10527	0	745	osa:4326503	enoyl-CoA hydratase/3-hydroxyacyl-CoA dehydrogenase [EC:4.2.1.17 1.1.1.35 1.1.1.211]	-	-	-
Unigene12902_All	isoleucine degradation I	acetyl-CoA C-acyltransferase activity	1810	30.2495	21.3585	-0.502101				gi|195640758|gb|ACG39847.1|	714	0	acetyl-CoA acetyltransferase, cytosolic 2 [Zea mays]	sp|Q9FIK7|THIC2_ARATH	616	2e-175	Probable acetyl-CoA acetyltransferase, cytosolic 2 OS=Arabidopsis thaliana GN=At5g47720 PE=2 SV=1	SPBC215.09c	453	4e-127	COG0183	Acetyl-CoA acetyltransferase	K00626	0	714	zma:100274017	acetyl-CoA C-acetyltransferase [EC:2.3.1.9]	-	GO:0016747//transferase activity, transferring acyl groups other than amino-acyl groups	-
Unigene7478_All	isoleucine degradation I	acetyl-CoA C-acyltransferase activity	523	83.4794	59.7828	-0.48169				gi|283806363|dbj|BAI66423.1|	236	1e-61	3-ketoacyl-CoA thiolase-like protein [Triticum aestivum]	sp|Q56WD9|THIK2_ARATH	187	2e-47	3-ketoacyl-CoA thiolase 2, peroxisomal OS=Arabidopsis thaliana GN=PED1 PE=1 SV=2	SA0342	62.8	3e-10	COG0183	Acetyl-CoA acetyltransferase	K07513	9e-57	216	zma:100192501	acetyl-CoA acyltransferase 1 [EC:2.3.1.16]	GO:0009694//jasmonic acid metabolic process;GO:0009062//fatty acid catabolic process;GO:0009657//plastid organization;GO:0006950//response to stress	GO:0016408	GO:0031981//nuclear lumen;GO:0009536//plastid;GO:0042579//microbody;GO:0016020//membrane
Unigene1032_All	isoleucine degradation I	acetyl-CoA C-acyltransferase activity	540	77.1365	56.3298	-0.453515				gi|115478180|ref|NP_001062685.1|	332	1e-90	Os09g0252100 [Oryza sativa Japonica Group] >gi|113630918|dbj|BAF24599.1| Os09g0252100 [Oryza sativa Japonica Group]	sp|Q8S4Y1|THIC1_ARATH	286	4e-77	Acetyl-CoA acetyltransferase, cytosolic 1 OS=Arabidopsis thaliana GN=AAT1 PE=2 SV=1	SPBC215.09c	182	3e-46	COG0183	Acetyl-CoA acetyltransferase	K00626	1e-91	332	osa:4346520	acetyl-CoA C-acetyltransferase [EC:2.3.1.9]	GO:0003006//reproductive developmental process	GO:0016453	GO:0016020//membrane;GO:0042579//microbody
Unigene10924_All	isoleucine degradation I	enoyl-CoA hydratase	988	23.7671	17.663	-0.428235				gi|115440471|ref|NP_001044515.1|	513	1e-144	Os01g0796400 [Oryza sativa Japonica Group] >gi|113534046|dbj|BAF06429.1| Os01g0796400 [Oryza sativa Japonica Group]	sp|Q45223|HBD_BRAJA	305	4e-82	3-hydroxybutyryl-CoA dehydrogenase OS=Bradyrhizobium japonicum GN=hbdA PE=3 SV=1	BMEI0099	326	4e-89	COG1250	3-hydroxyacyl-CoA dehydrogenase	K00074	1e-145	513	sbi:SORBI_03g037040	3-hydroxybutyryl-CoA dehydrogenase [EC:1.1.1.157]	-	-	-
Unigene15287_All	isoleucine degradation I	enoyl-CoA hydratase	291	6.4879	4.9974	-0.376574				gi|226506006|ref|NP_001152306.1|	161	2e-39	glyoxysomal fatty acid beta-oxidation multifunctional protein MFP-a [Zea mays] >gi|195654913|gb|ACG46924.1| glyoxysomal fatty acid beta-oxidation multifunctional protein MFP-a [Zea mays]	sp|O49809|MFPA_BRANA	157	3e-38	Glyoxysomal fatty acid beta-oxidation multifunctional protein MFP-a OS=Brassica napus PE=2 SV=2	PA3014_2	89	2e-18	COG1250	3-hydroxyacyl-CoA dehydrogenase	K10527	2e-40	160	osa:4326503	enoyl-CoA hydratase/3-hydroxyacyl-CoA dehydrogenase [EC:4.2.1.17 1.1.1.35 1.1.1.211]	GO:0009062//fatty acid catabolic process	GO:0016863//intramolecular oxidoreductase activity, transposing C=C bonds;GO:0016616//oxidoreductase activity, acting on the CH-OH group of donors, NAD or NADP as acceptor;GO:0048037//cofactor binding;GO:0016836//hydro-lyase activity;GO:0016856	GO:0030312//external encapsulating structure;GO:0005777//peroxisome;GO:0031981//nuclear lumen;GO:0031410//cytoplasmic vesicle
Unigene15338_All	isoleucine degradation I	enoyl-CoA hydratase	351	2.6894	2.0716	-0.376539				gi|115463427|ref|NP_001055313.1|	174	2e-43	Os05g0362100 [Oryza sativa Japonica Group] >gi|113578864|dbj|BAF17227.1| Os05g0362100 [Oryza sativa Japonica Group]	sp|Q39659|MFPA_CUCSA	131	1e-30	Glyoxysomal fatty acid beta-oxidation multifunctional protein MFP-a OS=Cucumis sativus PE=1 SV=1	mll4199_1	50.4	8e-07	COG1024	Enoyl-CoA hydratase/carnithine racemase	K10527	8e-36	145	osa:4326503	enoyl-CoA hydratase/3-hydroxyacyl-CoA dehydrogenase [EC:4.2.1.17 1.1.1.35 1.1.1.211]	-	-	-
Unigene22425_All	isoleucine degradation I	enoyl-CoA hydratase	751	49.0223	38.0829	-0.364295				gi|115441949|ref|NP_001045254.1|	309	3e-83	Os01g0925200 [Oryza sativa Japonica Group] >gi|20160715|dbj|BAB89657.1| enoyl CoA hydratase-like protein [Oryza sativa Japonica Group] >gi|113534785|dbj|BAF07168.1| Os01g0925200 [Oryza sativa Japonica Group]	sp|O35459|ECH1_MOUSE	175	3e-43	Delta(3,5)-Delta(2,4)-dienoyl-CoA isomerase, mitochondrial OS=Mus musculus GN=Ech1 PE=2 SV=1	ML0120	155	9e-38	COG1024	Enoyl-CoA hydratase/carnithine racemase	K01692	8e-86	313	sbi:SORBI_03g044410	enoyl-CoA hydratase [EC:4.2.1.17]	GO:0006631//fatty acid metabolic process	GO:0016863//intramolecular oxidoreductase activity, transposing C=C bonds;GO:0016836//hydro-lyase activity	GO:0042579//microbody
Unigene24409_All	isoleucine degradation I	2-oxoisovalerate dehydrogenase beta subunit, mitochondrial precursor, putative, expressed	787	50.6782	40.4985	-0.323497				gi|226510478|ref|NP_001148617.1|	285	4e-76	LOC100282233 [Zea mays] >gi|195620836|gb|ACG32248.1| pyruvate dehydrogenase E1 component subunit beta [Zea mays] >gi|195629754|gb|ACG36518.1| pyruvate dehydrogenase E1 component subunit beta [Zea mays] >gi|195638016|gb|ACG38476.1| pyruvate dehydrogenase E1 component subunit beta [Zea mays]	sp|Q32RM2|ODPB_ZYGCR	205	2e-52	Pyruvate dehydrogenase E1 component subunit beta OS=Zygnema circumcarinatum GN=pdhB PE=3 SV=2	all0122	190	2e-48	COG0022	Pyruvate/2-oxoglutarate dehydrogenase complex, dehydrogenase (E1) component, eukaryotic type, beta subunit	K00162	6e-81	297	sbi:SORBI_01g013540	pyruvate dehydrogenase E1 component subunit beta [EC:1.2.4.1]	-	-	-
Unigene3177_All	isoleucine degradation I	acetyl-CoA C-acyltransferase activity	575	34.4763	28.8743	-0.255819				gi|115478180|ref|NP_001062685.1|	235	3e-61	Os09g0252100 [Oryza sativa Japonica Group] >gi|113630918|dbj|BAF24599.1| Os09g0252100 [Oryza sativa Japonica Group]	sp|Q8S4Y1|THIC1_ARATH	219	1e-56	Acetyl-CoA acetyltransferase, cytosolic 1 OS=Arabidopsis thaliana GN=AAT1 PE=2 SV=1	SPBC215.09c	166	3e-41	COG0183	Acetyl-CoA acetyltransferase	K00626	2e-62	235	osa:4346520	acetyl-CoA C-acetyltransferase [EC:2.3.1.9]	-	-	-
Unigene17217_All	isoleucine degradation I	2-oxoisovalerate dehydrogenase beta subunit, mitochondrial precursor, putative, expressed	992	24.0281	20.4015	-0.236047				gi|115477529|ref|NP_001062360.1|	447	1e-124	Os08g0536000 [Oryza sativa Japonica Group] >gi|113624329|dbj|BAF24274.1| Os08g0536000 [Oryza sativa Japonica Group]	sp|Q38799|ODPB_ARATH	405	3e-112	Pyruvate dehydrogenase E1 component subunit beta, mitochondrial OS=Arabidopsis thaliana GN=PDH2 PE=1 SV=2	CC1727_2	287	2e-77	COG0022	Pyruvate/2-oxoglutarate dehydrogenase complex, dehydrogenase (E1) component, eukaryotic type, beta subunit	K00162	7e-126	447	osa:4346159	pyruvate dehydrogenase E1 component subunit beta [EC:1.2.4.1]	-	-	-
Unigene11817_All	isoleucine degradation I	2-oxoisovalerate dehydrogenase beta subunit, mitochondrial precursor, putative, expressed	819	80.5392	70.8777	-0.184359				gi|226529151|ref|NP_001150473.1|	415	1e-115	pyruvate dehydrogenase E1 component subunit beta [Zea mays] >gi|195639502|gb|ACG39219.1| pyruvate dehydrogenase E1 component subunit beta [Zea mays]	sp|Q32RS0|ODPB_STAPU	341	4e-93	Pyruvate dehydrogenase E1 component subunit beta OS=Staurastrum punctulatum GN=pdhB PE=3 SV=1	sll1721	297	1e-80	COG0022	Pyruvate/2-oxoglutarate dehydrogenase complex, dehydrogenase (E1) component, eukaryotic type, beta subunit	K00162	5e-117	417	sbi:SORBI_01g013540	pyruvate dehydrogenase E1 component subunit beta [EC:1.2.4.1]	-	-	-
Unigene5498_All	isoleucine degradation I	2-oxoisovalerate dehydrogenase alpha subunit, mitochondrial precursor, putative, expressed	886	10.3882	9.1643	-0.180849				gi|195659213|gb|ACG49074.1|	418	1e-116	pyruvate dehydrogenase E1 component alpha subunit [Zea mays]	sp|Q8H1Y0|ODPA2_ARATH	376	1e-103	Pyruvate dehydrogenase E1 component subunit alpha-2, mitochondrial OS=Arabidopsis thaliana GN=IAR4 PE=1 SV=2	SPAC26F1.03	225	9e-59	COG1071	Pyruvate/2-oxoglutarate dehydrogenase complex, dehydrogenase (E1) component, eukaryotic type, alpha subunit	K00161	1e-117	420	sbi:SORBI_10g008820	pyruvate dehydrogenase E1 component subunit alpha [EC:1.2.4.1]	-	-	-
Unigene1510_All	isoleucine degradation I	2-oxoisovalerate dehydrogenase beta subunit, mitochondrial precursor, putative, expressed	598	87.4142	78.2248	-0.160242				gi|226510478|ref|NP_001148617.1|	264	5e-70	LOC100282233 [Zea mays] >gi|195620836|gb|ACG32248.1| pyruvate dehydrogenase E1 component subunit beta [Zea mays] >gi|195629754|gb|ACG36518.1| pyruvate dehydrogenase E1 component subunit beta [Zea mays] >gi|195638016|gb|ACG38476.1| pyruvate dehydrogenase E1 component subunit beta [Zea mays]	sp|Q32RS0|ODPB_STAPU	216	7e-56	Pyruvate dehydrogenase E1 component subunit beta OS=Staurastrum punctulatum GN=pdhB PE=3 SV=1	sll1721	201	6e-52	COG0022	Pyruvate/2-oxoglutarate dehydrogenase complex, dehydrogenase (E1) component, eukaryotic type, beta subunit	K00162	4e-71	264	zma:100282233	pyruvate dehydrogenase E1 component subunit beta [EC:1.2.4.1]	-	-	-
Unigene24006_All	isoleucine degradation I	acetyl-CoA C-acyltransferase activity	583	43.1112	38.6636	-0.157087				gi|115478180|ref|NP_001062685.1|	188	4e-47	Os09g0252100 [Oryza sativa Japonica Group] >gi|113630918|dbj|BAF24599.1| Os09g0252100 [Oryza sativa Japonica Group]	sp|Q8S4Y1|THIC1_ARATH	161	3e-39	Acetyl-CoA acetyltransferase, cytosolic 1 OS=Arabidopsis thaliana GN=AAT1 PE=2 SV=1	YPL028w	134	1e-31	COG0183	Acetyl-CoA acetyltransferase	K00626	3e-48	188	osa:4346520	acetyl-CoA C-acetyltransferase [EC:2.3.1.9]	-	-	-
Unigene16194_All	isoleucine degradation I	2-oxoisovalerate dehydrogenase beta subunit, mitochondrial precursor, putative, expressed	682	15.5717	14.0379	-0.149599				gi|115477529|ref|NP_001062360.1|	251	6e-66	Os08g0536000 [Oryza sativa Japonica Group] >gi|113624329|dbj|BAF24274.1| Os08g0536000 [Oryza sativa Japonica Group]	sp|Q38799|ODPB_ARATH	214	6e-55	Pyruvate dehydrogenase E1 component subunit beta, mitochondrial OS=Arabidopsis thaliana GN=PDH2 PE=1 SV=2	SPBC30D10.13c	169	5e-42	COG0022	Pyruvate/2-oxoglutarate dehydrogenase complex, dehydrogenase (E1) component, eukaryotic type, beta subunit	K00162	4e-67	251	osa:4346159	pyruvate dehydrogenase E1 component subunit beta [EC:1.2.4.1]	-	-	-
Unigene17446_All	isoleucine degradation I	enoyl-CoA hydratase	1226	32.3391	29.4567	-0.134684				gi|115452629|ref|NP_001049915.1|	478	1e-134	Os03g0310400 [Oryza sativa Japonica Group] >gi|108707776|gb|ABF95571.1| enoyl-CoA hydratase/isomerase family protein, expressed [Oryza sativa Japonica Group] >gi|113548386|dbj|BAF11829.1| Os03g0310400 [Oryza sativa Japonica Group]	sp|P52046|CRT_CLOAB	145	6e-34	3-hydroxybutyryl-CoA dehydratase OS=Clostridium acetobutylicum GN=crt PE=3 SV=1	CC1723	199	8e-51	COG1024	Enoyl-CoA hydratase/carnithine racemase	K01692	6e-135	478	osa:4332628	enoyl-CoA hydratase [EC:4.2.1.17]	-	GO:0016836//hydro-lyase activity	GO:0042579//microbody
Unigene10062_All	isoleucine degradation I	2-oxoisovalerate dehydrogenase beta subunit, mitochondrial precursor, putative, expressed	327	4.3302	4.4473	0.0384961				gi|297847914|ref|XP_002891838.1|	72.8	1e-12	BCDH BETA1 [Arabidopsis lyrata subsp. lyrata] >gi|297337680|gb|EFH68097.1| BCDH BETA1 [Arabidopsis lyrata subsp. lyrata]	sp|Q55FN7|ODBB_DICDI	62	1e-09	2-oxoisovalerate dehydrogenase subunit beta, mitochondrial OS=Dictyostelium discoideum GN=bkdB PE=3 SV=1	CPn0033_2	51.2	4e-07	COG0022	Pyruvate/2-oxoglutarate dehydrogenase complex, dehydrogenase (E1) component, eukaryotic type, beta subunit	K00167	7e-14	72.8	ath:AT3G13450	2-oxoisovalerate dehydrogenase E1 component, beta subunit [EC:1.2.4.4]	GO:0008152//metabolic process	GO:0016624//oxidoreductase activity, acting on the aldehyde or oxo group of donors, disulfide as acceptor;GO:0004738//pyruvate dehydrogenase activity	GO:0043231//intracellular membrane-bounded organelle
Unigene25424_All	isoleucine degradation I	2-oxoisovalerate dehydrogenase beta subunit, mitochondrial precursor, putative, expressed	493	50.9814	61.4542	0.269541				gi|115489596|ref|NP_001067285.1|	322	9e-88	Os12g0616900 [Oryza sativa Japonica Group] >gi|113649792|dbj|BAF30304.1| Os12g0616900 [Oryza sativa Japonica Group]	sp|Q32RM2|ODPB_ZYGCR	273	5e-73	Pyruvate dehydrogenase E1 component subunit beta OS=Zygnema circumcarinatum GN=pdhB PE=3 SV=2	all0122	258	3e-69	COG0022	Pyruvate/2-oxoglutarate dehydrogenase complex, dehydrogenase (E1) component, eukaryotic type, beta subunit	K00162	8e-89	322	sbi:SORBI_08g021770	pyruvate dehydrogenase E1 component subunit beta [EC:1.2.4.1]	GO:0008152//metabolic process	GO:0004738//pyruvate dehydrogenase activity	GO:0043231//intracellular membrane-bounded organelle
Unigene18465_All	isoleucine degradation I	enoyl-CoA hydratase	958	32.3944	40.2272	0.312427				gi|115447659|ref|NP_001047609.1|	378	1e-104	Os02g0654100 [Oryza sativa Japonica Group] >gi|113537140|dbj|BAF09523.1| Os02g0654100 [Oryza sativa Japonica Group]	sp|Q54HG7|AUHM_DICDI	247	8e-65	Methylglutaconyl-CoA hydratase, mitochondrial OS=Dictyostelium discoideum GN=auh PE=3 SV=1	BS_yngF	217	2e-56	COG1024	Enoyl-CoA hydratase/carnithine racemase	K01692	4e-105	378	osa:4330184	enoyl-CoA hydratase [EC:4.2.1.17]	-	-	-
Unigene16526_All	isoleucine degradation I	2-oxoisovalerate dehydrogenase beta subunit, mitochondrial precursor, putative, expressed	317	24.5677	30.9659	0.333918				gi|226529151|ref|NP_001150473.1|	193	4e-49	pyruvate dehydrogenase E1 component subunit beta [Zea mays] >gi|195639502|gb|ACG39219.1| pyruvate dehydrogenase E1 component subunit beta [Zea mays]	sp|Q8MA03|ODPB_CHAGL	153	4e-37	Pyruvate dehydrogenase E1 component subunit beta OS=Chaetosphaeridium globosum GN=pdhB PE=3 SV=1	all0122	143	7e-35	COG0022	Pyruvate/2-oxoglutarate dehydrogenase complex, dehydrogenase (E1) component, eukaryotic type, beta subunit	K00162	3e-50	193	zma:100284103	pyruvate dehydrogenase E1 component subunit beta [EC:1.2.4.1]	-	-	-
Unigene12299_All	isoleucine degradation I	enoyl-CoA hydratase	393	5.4045	13.5681	1.32799				gi|115447659|ref|NP_001047609.1|	129	8e-30	Os02g0654100 [Oryza sativa Japonica Group] >gi|113537140|dbj|BAF09523.1| Os02g0654100 [Oryza sativa Japonica Group]	sp|Q47RV1|IF2_THEFY	54.7	2e-07	Translation initiation factor IF-2 OS=Thermobifida fusca (strain YX) GN=infB PE=3 SV=1	lin0859	47	8e-06	COG0513	Superfamily II DNA and RNA helicases	K01692	6e-31	129	osa:4330184	enoyl-CoA hydratase [EC:4.2.1.17]	-	-	-
Unigene43102_All	isoleucine degradation I	enoyl-CoA hydratase	523	0.4512	1.3903	1.62356				gi|115436430|ref|NP_001042973.1|	98.2	4e-20	Os01g0348600 [Oryza sativa Japonica Group] >gi|113532504|dbj|BAF04887.1| Os01g0348600 [Oryza sativa Japonica Group]	sp|O49809|MFPA_BRANA	84.3	4e-16	Glyoxysomal fatty acid beta-oxidation multifunctional protein MFP-a OS=Brassica napus PE=2 SV=2	--	--	--	--	--	K10527	4e-21	98.2	osa:4326503	enoyl-CoA hydratase/3-hydroxyacyl-CoA dehydrogenase [EC:4.2.1.17 1.1.1.35 1.1.1.211]	-	-	-
Unigene42283_All	isoleucine degradation I	2-oxoisovalerate dehydrogenase alpha subunit, mitochondrial precursor, putative, expressed	253	0.4664	2.395	2.36039				gi|283806367|dbj|BAI66425.1|	143	5e-34	2-oxoisovalerate dehydrogenase [Triticum aestivum]	--	--	--	--	--	--	--	--	--	K00166	9e-30	125	osa:4351684	2-oxoisovalerate dehydrogenase E1 component, alpha subunit [EC:1.2.4.4]	-	-	-
Unigene34626_All	isoleucine degradation I	acetyl-CoA C-acyltransferase activity	254	2.3228	0	-11.1816				gi|195625810|gb|ACG34735.1|	118	2e-26	acetyl-CoA acetyltransferase, cytosolic 1 [Zea mays]	sp|Q9FIK7|THIC2_ARATH	114	2e-25	Probable acetyl-CoA acetyltransferase, cytosolic 2 OS=Arabidopsis thaliana GN=At5g47720 PE=2 SV=1	SPBC215.09c	107	4e-24	COG0183	Acetyl-CoA acetyltransferase	K00626	1e-27	118	osa:4346520	acetyl-CoA C-acetyltransferase [EC:2.3.1.9]	-	-
Unigene44306_All	isoleucine degradation I	2-oxoisovalerate dehydrogenase alpha subunit, mitochondrial precursor, putative, expressed	984	0	0.4926	8.9443				gi|283806367|dbj|BAI66425.1|	572	1e-162	2-oxoisovalerate dehydrogenase [Triticum aestivum]	sp|Q54M22|ODBA_DICDI	318	3e-86	2-oxoisovalerate dehydrogenase subunit alpha, mitochondrial OS=Dictyostelium discoideum GN=bkdA PE=3 SV=1	TVN0102	203	3e-52	COG1071	Pyruvate/2-oxoglutarate dehydrogenase complex, dehydrogenase (E1) component, eukaryotic type, alpha subunit	K00166	6e-152	534	osa:4351684	2-oxoisovalerate dehydrogenase E1 component, alpha subunit [EC:1.2.4.4]	-	-	-
Unigene27371_All	lysine biosynthesis I and II	dihydrodipicolinate reductase	248	4.2822	0.9773	-2.13148				gi|15233478|ref|NP_192344.1|	112	1e-24	EMB2369 (EMBRYO DEFECTIVE 2369); ATP binding / aminoacyl-tRNA ligase/ leucine-tRNA ligase/ nucleotide binding [Arabidopsis thaliana] >gi|19310531|gb|AAL84999.1| AT4g04350/T19B17_7 [Arabidopsis thaliana] >gi|25090241|gb|AAN72260.1| At4g04350/T19B17_7 [Arabidopsis thaliana]	sp|Q2S415|SYL_SALRD	85.9	7e-17	Leucyl-tRNA synthetase OS=Salinibacter ruber (strain DSM 13855 / M31) GN=leuS PE=3 SV=1	--	--	--	--	--	K01869	2e-38	154	sbi:SORBI_03g007890	leucyl-tRNA synthetase [EC:6.1.1.4]	GO:0006418//tRNA aminoacylation for protein translation;GO:0003006//reproductive developmental process	GO:0004812//aminoacyl-tRNA ligase activity;GO:0032559//adenyl ribonucleotide binding	GO:0009536//plastid
Unigene1143_All	lysine biosynthesis I and II	dihydrodipicolinate synthase activity	726	7.8016	4.0062	-0.961536				gi|118237|sp|P24847.1|DAPA2_WHEAT	313	2e-84	RecName: Full=Dihydrodipicolinate synthase 2, chloroplastic; Short=DHDPS 2; Flags: Precursor >gi|170682|gb|AAA34264.1| dihydrodipicolinate synthase [Triticum aestivum]	sp|P24847|DAPA2_WHEAT	313	1e-84	Dihydrodipicolinate synthase 2, chloroplastic OS=Triticum aestivum PE=1 SV=1	PA1010	62	1e-09	COG0329	Dihydrodipicolinate synthase/N-acetylneuraminate lyase	K01714	8e-80	293	osa:4336734	dihydrodipicolinate synthase [EC:4.2.1.52]	-	-	-
Unigene2251_All	lysine biosynthesis I and II	dihydrodipicolinate synthase	1355	31.1762	17.2614	-0.852896				gi|118236|sp|P24846.1|DAPA1_WHEAT	724	0	RecName: Full=Dihydrodipicolinate synthase 1, chloroplastic; Short=DHDPS 1; Flags: Precursor >gi|170680|gb|AAA34263.1| dihydrodipicolinate synthase [Triticum aestivum]	sp|P24846|DAPA1_WHEAT	724	0	Dihydrodipicolinate synthase 1, chloroplastic OS=Triticum aestivum PE=1 SV=1	PA1010	156	9e-38	COG0329	Dihydrodipicolinate synthase/N-acetylneuraminate lyase	K01714	2e-179	625	osa:4335317	dihydrodipicolinate synthase [EC:4.2.1.52]	-	-	-
Unigene18154_All	lysine biosynthesis I and II	homoserine dehydrogenase	1496	12.147	7.0477	-0.785376				gi|115478398|ref|NP_001062794.1|	785	0	Os09g0294000 [Oryza sativa Japonica Group] >gi|50726450|dbj|BAD34058.1| aspartate kinase-homoserine dehydrogenase [Oryza sativa Japonica Group] >gi|113631027|dbj|BAF24708.1| Os09g0294000 [Oryza sativa Japonica Group]	sp|P49080|AKH2_MAIZE	780	0	Bifunctional aspartokinase/homoserine dehydrogenase 2, chloroplastic OS=Zea mays GN=AKHSDH2 PE=2 SV=1	XF2225_2	324	3e-88	COG0460	Homoserine dehydrogenase	K12524	0	785	osa:4346642	bifunctional aspartokinase/homoserine dehydrogenase 1 [EC:2.7.2.4 1.1.1.3]	-	-	-
Unigene14044_All	lysine biosynthesis I and II	aspartate-semialdehyde dehydrogenase	818	27.9852	16.7411	-0.74127				gi|115455493|ref|NP_001051347.1|	500	1e-141	Os03g0760700 [Oryza sativa Japonica Group] >gi|108711206|gb|ABF99001.1| aspartate-semialdehyde dehydrogenase family protein, expressed [Oryza sativa Japonica Group] >gi|113549818|dbj|BAF13261.1| Os03g0760700 [Oryza sativa Japonica Group]	sp|P49420|DHAS_PROMA	273	8e-73	Aspartate-semialdehyde dehydrogenase OS=Prochlorococcus marinus GN=asd PE=3 SV=2	all3680	274	1e-73	COG0136	Aspartate-semialdehyde dehydrogenase	K00133	7e-142	500	osa:4334188	aspartate-semialdehyde dehydrogenase [EC:1.2.1.11]	-	-	-
Unigene22467_All	lysine biosynthesis I and II	dihydrodipicolinate reductase	1372	16.857	10.3345	-0.705879				gi|115445913|ref|NP_001046736.1|	558	1e-158	Os02g0436400 [Oryza sativa Japonica Group] >gi|75253949|sp|Q67W29.1|DAPB1_ORYSJ RecName: Full=Probable dihydrodipicolinate reductase 1, chloroplastic; Short=DHPR 1; Flags: Precursor >gi|51535668|dbj|BAD37640.1| dihydrodipicolinate reductase-like [Oryza sativa Japonica Group] >gi|113536267|dbj|BAF08650.1| Os02g0436400 [Oryza sativa Japonica Group]	sp|Q67W29|DAPB1_ORYSJ	558	4e-158	Probable dihydrodipicolinate reductase 1, chloroplastic OS=Oryza sativa subsp. japonica GN=DAPB1 PE=2 SV=1	MK1422	69.7	1e-11	COG0289	Dihydrodipicolinate reductase	K00215	3e-117	419	osa:4332231	dihydrodipicolinate reductase [EC:1.3.1.26]	-	-	-
Unigene22197_All	lysine biosynthesis I and II	dihydrodipicolinate reductase	996	6.9899	4.6236	-0.596255				gi|115451871|ref|NP_001049536.1|	494	1e-139	Os03g0245100 [Oryza sativa Japonica Group] >gi|113548007|dbj|BAF11450.1| Os03g0245100 [Oryza sativa Japonica Group]	sp|Q10P67|DAPB2_ORYSJ	494	3e-139	Probable dihydrodipicolinate reductase 2, chloroplastic OS=Oryza sativa subsp. japonica GN=DAPB2 PE=2 SV=1	MK1422	69.7	7e-12	COG0289	Dihydrodipicolinate reductase	K00215	4e-140	494	osa:4332231	dihydrodipicolinate reductase [EC:1.3.1.26]	-	-	-
Unigene18293_All	lysine biosynthesis I and II	diaminopimelate epimerase	1560	45.0818	30.9184	-0.544079				gi|122203466|sp|Q2QNF7.1|DAPF_ORYSJ	624	1e-177	RecName: Full=Diaminopimelate epimerase, chloroplastic; Short=DAP epimerase; Flags: Precursor	sp|Q2QNF7|DAPF_ORYSJ	624	6e-178	Diaminopimelate epimerase, chloroplastic OS=Oryza sativa subsp. japonica GN=DAPF PE=2 SV=1	slr1665	361	2e-99	COG0253	Diaminopimelate epimerase	K01778	3e-171	598	zma:100191234	diaminopimelate epimerase [EC:5.1.1.7]	-	-	-
Unigene20845_All	lysine biosynthesis I and II	aspartate family amino acid biosynthesis	754	11.5808	8.3578	-0.47054				gi|115456611|ref|NP_001051906.1|	237	1e-61	Os03g0850400 [Oryza sativa Japonica Group] >gi|113550377|dbj|BAF13820.1| Os03g0850400 [Oryza sativa Japonica Group]	sp|Q9LYU8|AK1_ARATH	184	6e-46	Aspartokinase 1, chloroplastic OS=Arabidopsis thaliana GN=AK1 PE=1 SV=1	YER052c	62.4	8e-10	COG0527	Aspartokinases	K00928	1e-62	237	osa:4334794	aspartate kinase [EC:2.7.2.4]	GO:0006520//cellular amino acid metabolic process	GO:0031406//carboxylic acid binding;GO:0016774//phosphotransferase activity, carboxyl group as acceptor	GO:0043231//intracellular membrane-bounded organelle
Unigene35774_All	lysine biosynthesis I and II	aspartate family amino acid biosynthesis	433	3.8152	2.7988	-0.44695				gi|115478398|ref|NP_001062794.1|	275	1e-73	Os09g0294000 [Oryza sativa Japonica Group] >gi|50726450|dbj|BAD34058.1| aspartate kinase-homoserine dehydrogenase [Oryza sativa Japonica Group] >gi|113631027|dbj|BAF24708.1| Os09g0294000 [Oryza sativa Japonica Group]	sp|P49080|AKH2_MAIZE	273	3e-73	Bifunctional aspartokinase/homoserine dehydrogenase 2, chloroplastic OS=Zea mays GN=AKHSDH2 PE=2 SV=1	MA0131	130	6e-31	COG0527	Aspartokinases	K12524	1e-74	275	osa:4346642	bifunctional aspartokinase/homoserine dehydrogenase 1 [EC:2.7.2.4 1.1.1.3]	GO:0006412//translation;GO:0000097//sulfur amino acid biosynthetic process	GO:0016876//ligase activity, forming aminoacyl-tRNA and related compounds;GO:0016774//phosphotransferase activity, carboxyl group as acceptor;GO:0016616//oxidoreductase activity, acting on the CH-OH group of donors, NAD or NADP as acceptor;GO:0031406//carboxylic acid binding;GO:0032559//adenyl ribonucleotide binding	GO:0009536//plastid
Unigene17187_All	lysine biosynthesis I and II	aspartate family amino acid biosynthesis	738	8.3143	7.0611	-0.235702				gi|115441983|ref|NP_001045271.1|	220	1e-56	Os01g0927900 [Oryza sativa Japonica Group] >gi|113534802|dbj|BAF07185.1| Os01g0927900 [Oryza sativa Japonica Group]	sp|Q9LYU8|AK1_ARATH	185	3e-46	Aspartokinase 1, chloroplastic OS=Arabidopsis thaliana GN=AK1 PE=1 SV=1	VC0391	61.2	2e-09	COG0527	Aspartokinases	K00928	9e-58	220	osa:4326958	aspartate kinase [EC:2.7.2.4]	-	-	-
Unigene10722_All	lysine biosynthesis I and II	aspartate-semialdehyde dehydrogenase	1095	3.2329	2.9882	-0.113552				gi|149392525|gb|ABR26065.1|	106	6e-22	aspartate-semialdehyde dehydrogenase [Oryza sativa Indica Group]	sp|P49420|DHAS_PROMA	76.6	3e-13	Aspartate-semialdehyde dehydrogenase OS=Prochlorococcus marinus GN=asd PE=3 SV=2	all3680	73.2	8e-13	COG0136	Aspartate-semialdehyde dehydrogenase	K00133	4e-23	106	osa:4334188	aspartate-semialdehyde dehydrogenase [EC:1.2.1.11]	-	-	-
Unigene18771_All	lysine biosynthesis I and II	aspartate family amino acid biosynthesis	365	2.263	3.6522	0.690529				gi|115441983|ref|NP_001045271.1|	186	1e-46	Os01g0927900 [Oryza sativa Japonica Group] >gi|113534802|dbj|BAF07185.1| Os01g0927900 [Oryza sativa Japonica Group]	sp|Q9LYU8|AK1_ARATH	164	2e-40	Aspartokinase 1, chloroplastic OS=Arabidopsis thaliana GN=AK1 PE=1 SV=1	AF0700	72.4	2e-13	COG0527	Aspartokinases	K00928	6e-48	186	osa:4326958	aspartate kinase [EC:2.7.2.4]	-	-	-
Unigene39625_All	lysine biosynthesis I and II	aspartate family amino acid biosynthesis	206	0.5728	1.7649	1.62348				gi|115441983|ref|NP_001045271.1|	61.2	4e-09	Os01g0927900 [Oryza sativa Japonica Group] >gi|113534802|dbj|BAF07185.1| Os01g0927900 [Oryza sativa Japonica Group]	--	--	--	--	--	--	--	--	--	K00928	2e-10	61.2	osa:4326958	aspartate kinase [EC:2.7.2.4]	-	GO:0016740//transferase activity	-
Unigene17301_All	lysine biosynthesis IV	homoaconitate hydratase	1584	26.2966	16.4491	-0.676868				gi|115450595|ref|NP_001048898.1|	786	0	Os03g0136900 [Oryza sativa Japonica Group] >gi|113547369|dbj|BAF10812.1| Os03g0136900 [Oryza sativa Japonica Group]	sp|Q9SIB9|ACO2M_ARATH	721	0	Aconitate hydratase 2, mitochondrial OS=Arabidopsis thaliana GN=ACO2 PE=1 SV=2	BS_citB	462	5e-130	COG1048	Aconitase A	K01681	0	792	sbi:SORBI_01g047850	aconitate hydratase 1 [EC:4.2.1.3]	-	-	-
Unigene39280_All	lysine biosynthesis IV	homoaconitate hydratase	287	0.4111	3.3781	3.03865				gi|297595990|ref|NP_001041866.2|	169	7e-42	Os01g0120300 [Oryza sativa Japonica Group] >gi|255672813|dbj|BAF03780.2| Os01g0120300 [Oryza sativa Japonica Group]	sp|Q2S415|SYL_SALRD	113	3e-25	Leucyl-tRNA synthetase OS=Salinibacter ruber (strain DSM 13855 / M31) GN=leuS PE=3 SV=1	Rv0041	90.5	7e-19	COG0495	Leucyl-tRNA synthetase	K01869	2e-43	170	sbi:SORBI_03g007890	leucyl-tRNA synthetase [EC:6.1.1.4]	GO:0006418//tRNA aminoacylation for protein translation;GO:0003006//reproductive developmental process	GO:0004812//aminoacyl-tRNA ligase activity;GO:0032559//adenyl ribonucleotide binding	GO:0009536//plastid
Unigene8463_All	methionine biosynthesis	S-adenosylmethionine synthase	1078	39.5155	25.8564	-0.611897				gi|223635315|sp|B0LXM0.1|METK_WHEAT	558	1e-158	RecName: Full=S-adenosylmethionine synthase; Short=AdoMet synthase; AltName: Full=Methionine adenosyltransferase; Short=MAT >gi|166235928|gb|ABY85789.1| S-adenosylmethionine synthetase [Triticum aestivum]	sp|B0LXM0|METK_WHEAT	558	2e-158	S-adenosylmethionine synthase OS=Triticum aestivum GN=SAMS PE=2 SV=1	SPBC14F5.05c	373	3e-103	COG0192	S-adenosylmethionine synthetase	K00789	5e-157	551	sbi:SORBI_03g011930	S-adenosylmethionine synthetase [EC:2.5.1.6]	-	-	-
Unigene8462_All	methionine biosynthesis	S-adenosylmethionine synthase	928	173.693	114.005	-0.607439				gi|122220776|sp|Q4LB21.1|METK4_HORVU	563	1e-159	RecName: Full=S-adenosylmethionine synthase 4; Short=AdoMet synthase 4; AltName: Full=Methionine adenosyltransferase 4; Short=MAT 4	sp|Q4LB21|METK4_HORVU	563	8e-160	S-adenosylmethionine synthase 4 OS=Hordeum vulgare GN=SAM4 PE=2 SV=1	SPBC14F5.05c	369	4e-102	COG0192	S-adenosylmethionine synthetase	K00789	4e-158	554	sbi:SORBI_03g011930	S-adenosylmethionine synthetase [EC:2.5.1.6]	-	-	-
Unigene8464_All	methionine biosynthesis	S-adenosylmethionine synthase	1914	367.006	306.831	-0.258358				gi|122220778|sp|Q4LB23.1|METK2_HORVU	802	0	RecName: Full=S-adenosylmethionine synthase 2; Short=AdoMet synthase 2; AltName: Full=Methionine adenosyltransferase 2; Short=MAT 2	sp|Q4LB23|METK2_HORVU	802	0	S-adenosylmethionine synthase 2 OS=Hordeum vulgare GN=SAM2 PE=2 SV=1	SPBC14F5.05c	491	1e-138	COG0192	S-adenosylmethionine synthetase	K00789	0	771	zma:100194360	S-adenosylmethionine synthetase [EC:2.5.1.6]	-	-	-
Unigene27785_All	methionine biosynthesis I and II	5-methyltetrahydropteroyltriglutamate-homocysteine s-methyltransferase activity	305	2.7082	0.7947	-1.76885				gi|8134569|sp|Q42662.2|METE_SOLSC	94	5e-19	RecName: Full=5-methyltetrahydropteroyltriglutamate--homocysteine methyltransferase; AltName: Full=Cobalamin-independent methionine synthase isozyme; AltName: Full=Vitamin-B12-independent methionine synthase isozyme	sp|Q9UT19|METE_SCHPO	135	1e-31	Probable 5-methyltetrahydropteroyltriglutamate--homocysteine methyltransferase OS=Schizosaccharomyces pombe (strain ATCC 38366 / 972) GN=SPAC9.09 PE=1 SV=1	SPAC9.09	135	2e-32	COG0620	Methionine synthase II (cobalamin-independent)	K00549	2e-19	91.3	cme:CMJ234C	5-methyltetrahydropteroyltriglutamate--homocysteine methyltransferase [EC:2.1.1.14]	-	GO:0016740//transferase activity	-
Unigene23698_All	methionine biosynthesis I and II	5-methyltetrahydropteroyltriglutamate-homocysteine s-methyltransferase activity	1131	599.595	328.203	-0.869399				gi|68655495|emb|CAJ01713.1|	730	0	methionine synthase 1 enzyme [Hordeum vulgare subsp. vulgare]	sp|P93263|METE_MESCR	661	0	5-methyltetrahydropteroyltriglutamate--homocysteine methyltransferase OS=Mesembryanthemum crystallinum GN=METE PE=2 SV=1	RSp0676	350	2e-96	COG0620	Methionine synthase II (cobalamin-independent)	K00549	0	684	osa:4352833	5-methyltetrahydropteroyltriglutamate--homocysteine methyltransferase [EC:2.1.1.14]	-	-	-
Unigene17943_All	methionine biosynthesis I and II	cystathionine beta-lyase activity	950	56.7639	31.2536	-0.860951				gi|115453239|ref|NP_001050220.1|	451	1e-126	Os03g0376100 [Oryza sativa Japonica Group] >gi|113548691|dbj|BAF12134.1| Os03g0376100 [Oryza sativa Japonica Group]	sp|P55217|METB_ARATH	360	1e-98	Cystathionine gamma-synthase, chloroplastic OS=Arabidopsis thaliana GN=CGS1 PE=2 SV=3	SSO2368	213	3e-55	COG0626	Cystathionine beta-lyases/cystathionine gamma-synthases	K01739	5e-127	451	osa:4332956	cystathionine gamma-synthase [EC:2.5.1.48]	-	-	-
Unigene9487_All	methionine biosynthesis I and II	cystathionine beta-lyase activity	583	31.1696	17.461	-0.836003				gi|2198853|gb|AAB61348.1|	337	5e-92	cystathionine gamma-synthase [Zea mays]	sp|P55217|METB_ARATH	244	4e-64	Cystathionine gamma-synthase, chloroplastic OS=Arabidopsis thaliana GN=CGS1 PE=2 SV=3	TVN0174	90.5	2e-18	COG0626	Cystathionine beta-lyases/cystathionine gamma-synthases	K01739	3e-72	268	osa:4332956	cystathionine gamma-synthase [EC:2.5.1.48]	-	GO:0016765//transferase activity, transferring alkyl or aryl (other than methyl) groups;GO:0048037//cofactor binding	GO:0009536//plastid
Unigene4191_All	methionine biosynthesis I and II	5-methyltetrahydropteroyltriglutamate-homocysteine s-methyltransferase activity	974	110.609	67.6859	-0.708544				gi|115589740|gb|ABJ15729.1|	432	1e-120	cobalamin-independent methionine synthase [Triticum monococcum]	sp|Q42662|METE_SOLSC	397	8e-110	5-methyltetrahydropteroyltriglutamate--homocysteine methyltransferase OS=Solenostemon scutellarioides GN=MET PE=1 SV=2	XF2272	263	3e-70	COG0620	Methionine synthase II (cobalamin-independent)	K00549	7e-115	410	osa:4352833	5-methyltetrahydropteroyltriglutamate--homocysteine methyltransferase [EC:2.1.1.14]	-	-	-
Unigene25845_All	methionine biosynthesis I and II	5-methyltetrahydropteroyltriglutamate-homocysteine s-methyltransferase activity	651	117.456	72.787	-0.690362				gi|68655495|emb|CAJ01713.1|	375	1e-103	methionine synthase 1 enzyme [Hordeum vulgare subsp. vulgare]	sp|P93263|METE_MESCR	328	1e-89	5-methyltetrahydropteroyltriglutamate--homocysteine methyltransferase OS=Mesembryanthemum crystallinum GN=METE PE=2 SV=1	CC0482	209	4e-54	COG0620	Methionine synthase II (cobalamin-independent)	K00549	7e-99	357	osa:4352833	5-methyltetrahydropteroyltriglutamate--homocysteine methyltransferase [EC:2.1.1.14]	-	-	-
Unigene41885_All	methionine biosynthesis I and II	5-methyltetrahydropteroyltriglutamate-homocysteine s-methyltransferase activity	264	707.548	465.471	-0.604139				gi|115589740|gb|ABJ15729.1|	182	8e-46	cobalamin-independent methionine synthase [Triticum monococcum]	sp|O50008|METE_ARATH	171	1e-42	5-methyltetrahydropteroyltriglutamate--homocysteine methyltransferase OS=Arabidopsis thaliana GN=CIMS PE=1 SV=1	XF2272	126	1e-29	COG0620	Methionine synthase II (cobalamin-independent)	K00549	1e-46	181	osa:4352833	5-methyltetrahydropteroyltriglutamate--homocysteine methyltransferase [EC:2.1.1.14]	-	-	-
Unigene13995_All	methionine biosynthesis I and II	5-methyltetrahydropteroyltriglutamate-homocysteine s-methyltransferase activity	1085	248.397	208.42	-0.253149				gi|68655500|emb|CAJ01714.1|	704	0	methionine synthase 2 enzyme [Hordeum vulgare subsp. vulgare]	sp|Q42699|METE_CATRO	624	5e-178	5-methyltetrahydropteroyltriglutamate--homocysteine methyltransferase OS=Catharanthus roseus GN=METE PE=2 SV=1	RSp0676	342	9e-94	COG0620	Methionine synthase II (cobalamin-independent)	K00549	0	654	osa:4352833	5-methyltetrahydropteroyltriglutamate--homocysteine methyltransferase [EC:2.1.1.14]	-	-	-
Unigene2895_All	methionine biosynthesis I and II	5-methyltetrahydropteroyltriglutamate-homocysteine s-methyltransferase activity	390	329.793	278.731	-0.242684				gi|68655500|emb|CAJ01714.1|	87.4	5e-17	methionine synthase 2 enzyme [Hordeum vulgare subsp. vulgare]	sp|Q42662|METE_SOLSC	80.5	3e-15	5-methyltetrahydropteroyltriglutamate--homocysteine methyltransferase OS=Solenostemon scutellarioides GN=MET PE=1 SV=2	mll6123	57.8	5e-09	COG0620	Methionine synthase II (cobalamin-independent)	K00549	5e-17	83.6	osa:4352833	5-methyltetrahydropteroyltriglutamate--homocysteine methyltransferase [EC:2.1.1.14]	-	-	-
Unigene41986_All	methionine biosynthesis I and II	5-methyltetrahydropteroyltriglutamate-homocysteine s-methyltransferase activity	631	245.91	208.189	-0.240233				gi|68655500|emb|CAJ01714.1|	359	1e-98	methionine synthase 2 enzyme [Hordeum vulgare subsp. vulgare]	sp|P93263|METE_MESCR	320	5e-87	5-methyltetrahydropteroyltriglutamate--homocysteine methyltransferase OS=Mesembryanthemum crystallinum GN=METE PE=2 SV=1	CC0482	197	9e-51	COG0620	Methionine synthase II (cobalamin-independent)	K00549	9e-95	343	osa:4352833	5-methyltetrahydropteroyltriglutamate--homocysteine methyltransferase [EC:2.1.1.14]	-	-	-
Unigene32364_All	methionine biosynthesis I and II	5-methyltetrahydropteroyltriglutamate-homocysteine s-methyltransferase activity	287	4.5226	0	-12.1429				gi|115361539|gb|ABI95860.1|	140	3e-33	methionine synthase [Nicotiana suaveolens]	sp|Q9UT19|METE_SCHPO	174	2e-43	Probable 5-methyltetrahydropteroyltriglutamate--homocysteine methyltransferase OS=Schizosaccharomyces pombe (strain ATCC 38366 / 972) GN=SPAC9.09 PE=1 SV=1	SPAC9.09	174	4e-44	COG0620	Methionine synthase II (cobalamin-independent)	--	--	--	--	--	-	-	-
Unigene41793_All	methionine biosynthesis I and II	5-methyltetrahydropteroyltriglutamate-homocysteine s-methyltransferase activity	677	0	0	#DIV/0!				gi|115589740|gb|ABJ15729.1|	247	8e-65	cobalamin-independent methionine synthase [Triticum monococcum]	sp|Q42662|METE_SOLSC	224	3e-58	5-methyltetrahydropteroyltriglutamate--homocysteine methyltransferase OS=Solenostemon scutellarioides GN=MET PE=1 SV=2	PA1927	147	1e-35	COG0620	Methionine synthase II (cobalamin-independent)	K00549	8e-60	227	osa:4352833	5-methyltetrahydropteroyltriglutamate--homocysteine methyltransferase [EC:2.1.1.14]	-	-	-
Unigene15558_All	methionine biosynthesis I and II + methionine degradation II	cystathionine beta-lyase or methionine gamma-lyase	1130	17.9609	13.9419	-0.365432				gi|115482952|ref|NP_001065069.1|	541	1e-153	Os10g0517500 [Oryza sativa Japonica Group] >gi|31433074|gb|AAP54634.1| Cys/Met metabolism PLP-dependent enzyme family protein, expressed [Oryza sativa Japonica Group] >gi|113639678|dbj|BAF26983.1| Os10g0517500 [Oryza sativa Japonica Group]	sp|P13254|MEGL_PSEPU	148	8e-35	Methionine gamma-lyase OS=Pseudomonas putida GN=mdeA PE=1 SV=2	DR0921	159	8e-39	COG0626	Cystathionine beta-lyases/cystathionine gamma-synthases	K01761	4e-155	545	sbi:SORBI_01g017060	methionine-gamma-lyase [EC:4.4.1.11]	-	-	-
Unigene13372_All	methionine biosynthesis I and II + methionine degradation II	cystathionine beta-lyase or methionine gamma-lyase	895	93.7402	95.7314	0.0303243				gi|23495284|dbj|BAC20137.1|	272	4e-72	rrj1 [Oryza sativa]	sp|Q9S740|AGP19_ARATH	65.5	5e-10	Lysine-rich arabinogalactan protein 19 OS=Arabidopsis thaliana GN=AGP19 PE=2 SV=1	DR0921	79.3	8e-15	COG0626	Cystathionine beta-lyases/cystathionine gamma-synthases	K01761	3e-73	272	osa:4349123	methionine-gamma-lyase [EC:4.4.1.11]	-	-	-
Unigene44984_All	methionine biosynthesis I and II + methionine degradation II	cystathionine beta-lyase or methionine gamma-lyase	667	8.1379	10.9014	0.421785				gi|115482952|ref|NP_001065069.1|	393	1e-109	Os10g0517500 [Oryza sativa Japonica Group] >gi|31433074|gb|AAP54634.1| Cys/Met metabolism PLP-dependent enzyme family protein, expressed [Oryza sativa Japonica Group] >gi|113639678|dbj|BAF26983.1| Os10g0517500 [Oryza sativa Japonica Group]	sp|P55218|METZ_PSEAE	139	2e-32	O-succinylhomoserine sulfhydrylase OS=Pseudomonas aeruginosa GN=metZ PE=3 SV=1	DR0921	144	2e-34	COG0626	Cystathionine beta-lyases/cystathionine gamma-synthases	K01761	7e-110	393	osa:4349123	methionine-gamma-lyase [EC:4.4.1.11]	GO:0009087//methionine catabolic process	GO:0016765//transferase activity, transferring alkyl or aryl (other than methyl) groups;GO:0048037//cofactor binding;GO:0016846//carbon-sulfur lyase activity	GO:0044444//cytoplasmic part
Unigene23782_All	methionine biosynthesis II	homocysteine s-methyltransferase activity	961	253.925	155.993	-0.702926				gi|115489490|ref|NP_001067232.1|	579	1e-164	Os12g0607000 [Oryza sativa Japonica Group] >gi|113649739|dbj|BAF30251.1| Os12g0607000 [Oryza sativa Japonica Group]	sp|Q9FUM8|HMT3_MAIZE	575	2e-163	Homocysteine S-methyltransferase 3 OS=Zea mays GN=HMT-3 PE=2 SV=1	CAC3348	275	1e-73	COG2040	Homocysteine/selenocysteine methylase (S-methylmethionine-dependent)	K00547	2e-134	475	pop:POPTR_559589	homocysteine S-methyltransferase [EC:2.1.1.10]	-	-	-
Unigene23483_All	methionine biosynthesis II	homocysteine s-methyltransferase activity	1487	15.3153	12.4692	-0.296605				gi|22748320|gb|AAN05322.1|	593	1e-168	Putative homocysteine S-methyltransferase-1 [Oryza sativa Japonica Group]	sp|Q9FUN0|HMT1_MAIZE	582	3e-165	Homocysteine S-methyltransferase 1 OS=Zea mays GN=HMT-1 PE=2 SV=1	BS_ybgG	272	1e-72	COG2040	Homocysteine/selenocysteine methylase (S-methylmethionine-dependent)	K00547	3e-145	512	osa:4332095	homocysteine S-methyltransferase [EC:2.1.1.10]	-	-	-
Unigene17192_All	methionine biosynthesis II	homocysteine s-methyltransferase activity	1451	13.8249	14.6995	0.088498				gi|115440233|ref|NP_001044396.1|	496	1e-139	Os01g0772900 [Oryza sativa Japonica Group] >gi|113533927|dbj|BAF06310.1| Os01g0772900 [Oryza sativa Japonica Group]	sp|Q9FUM7|HMT4_MAIZE	496	2e-139	Homocysteine S-methyltransferase 4 OS=Zea mays GN=HMT-4 PE=2 SV=1	CAC3348	263	4e-70	COG2040	Homocysteine/selenocysteine methylase (S-methylmethionine-dependent)	K00547	2e-140	496	osa:4324713	homocysteine S-methyltransferase [EC:2.1.1.10]	-	-	-
Unigene34807_All	methionine biosynthesis II	homocysteine s-methyltransferase activity	755	0.3126	0	-8.2882				gi|115440233|ref|NP_001044396.1|	312	3e-84	Os01g0772900 [Oryza sativa Japonica Group] >gi|113533927|dbj|BAF06310.1| Os01g0772900 [Oryza sativa Japonica Group]	sp|Q9FUM7|HMT4_MAIZE	267	7e-71	Homocysteine S-methyltransferase 4 OS=Zea mays GN=HMT-4 PE=2 SV=1	yagD	164	1e-40	COG2040	Homocysteine/selenocysteine methylase (S-methylmethionine-dependent)	K00547	2e-85	312	osa:4324713	homocysteine S-methyltransferase [EC:2.1.1.10]	-	-	-
Unigene32591_All	methionine degradation I	oxidoreductase, acting on the CH-OH group of donors, NAD or NADP as acceptor	327	6.8562	1.4824	-2.20947				gi|301107277|ref|XP_002902721.1|	127	4e-29	adenosylhomocysteinase [Phytophthora infestans T30-4] >gi|262098595|gb|EEY56647.1| adenosylhomocysteinase [Phytophthora infestans T30-4]	sp|P83783|SAHH_CANAL	149	4e-36	Adenosylhomocysteinase OS=Candida albicans GN=SAH1 PE=1 SV=2	YER043c	149	1e-36	COG0499	S-adenosylhomocysteine hydrolase	K01251	2e-38	154	zma:100274418	adenosylhomocysteinase [EC:3.3.1.1]	-	-	-
Unigene33207_All	methionine degradation I	S-adenosylhomocysteine hydrolase	254	2.7874	0.9542	-1.54656				gi|303275756|ref|XP_003057172.1|	72	2e-12	adenosylhomocysteinase [Micromonas pusilla CCMP1545] >gi|226461524|gb|EEH58817.1| adenosylhomocysteinase [Micromonas pusilla CCMP1545]	sp|P39954|SAHH_YEAST	94.4	2e-19	Adenosylhomocysteinase OS=Saccharomyces cerevisiae (strain ATCC 204508 / S288c) GN=SAH1 PE=1 SV=1	YER043c	94.4	5e-20	COG0499	S-adenosylhomocysteine hydrolase	K01251	3e-22	100	zma:100274418	adenosylhomocysteinase [EC:3.3.1.1]	-	-	-
Unigene41975_All	methionine degradation I	S-adenosylhomocysteine hydrolase	799	6.6458	4.2469	-0.646033				gi|122220776|sp|Q4LB21.1|METK4_HORVU	249	3e-65	RecName: Full=S-adenosylmethionine synthase 4; Short=AdoMet synthase 4; AltName: Full=Methionine adenosyltransferase 4; Short=MAT 4	sp|Q4LB21|METK4_HORVU	249	2e-65	S-adenosylmethionine synthase 4 OS=Hordeum vulgare GN=SAM4 PE=2 SV=1	TM1658	131	1e-30	COG0192	S-adenosylmethionine synthetase	K00789	4e-63	238	osa:4337733	S-adenosylmethionine synthetase [EC:2.5.1.6]	-	-	-
Unigene21850_All	methionine degradation I	methionine adenosyltransferase regulatory beta subunit, putative, expressed	1093	15.0063	10.9767	-0.451124				gi|115449925|ref|NP_001048585.1|	492	1e-138	Os02g0826200 [Oryza sativa Japonica Group] >gi|113538116|dbj|BAF10499.1| Os02g0826200 [Oryza sativa Japonica Group]	sp|Q5R4E0|MAT2B_PONAB	102	6e-21	Methionine adenosyltransferase 2 subunit beta OS=Pongo abelii GN=MAT2B PE=2 SV=1	alr3336	94	4e-19	COG1091	dTDP-4-dehydrorhamnose reductase	--	--	--	--	--	GO:0033692	GO:0048037//cofactor binding;GO:0016616//oxidoreductase activity, acting on the CH-OH group of donors, NAD or NADP as acceptor	GO:0044464//cell part
Unigene4279_All	methionine degradation I	S-adenosylhomocysteine hydrolase	1675	1120.96	887.31	-0.337221				gi|68655456|emb|CAJ01706.1|	806	0	S-adenosyl-L-homocysteine hydrolase [Hordeum vulgare subsp. vulgare]	sp|P32112|SAHH_WHEAT	795	0	Adenosylhomocysteinase OS=Triticum aestivum GN=SAHH PE=2 SV=1	Rv3248c	474	3e-133	COG0499	S-adenosylhomocysteine hydrolase	K01251	0	778	osa:4350455	adenosylhomocysteinase [EC:3.3.1.1]	-	-	-
Unigene41703_All	methionine degradation I	S-adenosylhomocysteine hydrolase	342	172.513	147.055	-0.230351				gi|122220778|sp|Q4LB23.1|METK2_HORVU	112	1e-24	RecName: Full=S-adenosylmethionine synthase 2; Short=AdoMet synthase 2; AltName: Full=Methionine adenosyltransferase 2; Short=MAT 2	sp|P93438|METK2_ORYSJ	112	7e-25	S-adenosylmethionine synthase 2 OS=Oryza sativa subsp. japonica GN=SAM2 PE=2 SV=1	YLR180w	90.9	5e-19	COG0192	S-adenosylmethionine synthetase	K00789	2e-25	110	zma:100194360	S-adenosylmethionine synthetase [EC:2.5.1.6]	-	-	-
Unigene4278_All	methionine degradation I	S-adenosylhomocysteine hydrolase	1139	295.257	253.015	-0.222748				gi|68655456|emb|CAJ01706.1|	394	1e-108	S-adenosyl-L-homocysteine hydrolase [Hordeum vulgare subsp. vulgare]	sp|P32112|SAHH_WHEAT	387	8e-107	Adenosylhomocysteinase OS=Triticum aestivum GN=SAHH PE=2 SV=1	XF1037	258	1e-68	COG0499	S-adenosylhomocysteine hydrolase	K01251	4e-108	389	osa:4350455	adenosylhomocysteinase [EC:3.3.1.1]	-	-	-
Unigene38154_All	methionine degradation I	S-adenosylhomocysteine hydrolase	414	218.897	200.516	-0.126538				gi|122220777|sp|Q4LB22.1|METK3_HORVU	278	1e-74	RecName: Full=S-adenosylmethionine synthase 3; Short=AdoMet synthase 3; AltName: Full=Methionine adenosyltransferase 3; Short=MAT 3	sp|Q4LB22|METK3_HORVU	278	6e-75	S-adenosylmethionine synthase 3 OS=Hordeum vulgare GN=SAM3 PE=2 SV=1	YLR180w	188	2e-48	COG0192	S-adenosylmethionine synthetase	K00789	6e-72	266	zma:100194360	S-adenosylmethionine synthetase [EC:2.5.1.6]	-	-	-
Unigene41803_All	methionine degradation I	S-adenosylhomocysteine hydrolase	308	466.633	503.243	0.108967				gi|115589746|gb|ABJ15732.1|	207	2e-53	S-adenosylmethionine synthetase 2 [Triticum monococcum]	sp|Q4LB22|METK3_HORVU	207	1e-53	S-adenosylmethionine synthase 3 OS=Hordeum vulgare GN=SAM3 PE=2 SV=1	SPBC14F5.05c	110	6e-25	COG0192	S-adenosylmethionine synthetase	K00789	8e-52	198	zma:100194360	S-adenosylmethionine synthetase [EC:2.5.1.6]	-	-	-
Unigene33824_All	methionine degradation I	S-adenosylhomocysteine hydrolase	248	5.2338	0	-12.3536				gi|308807887|ref|XP_003081254.1|	75.5	2e-13	SAHH_PETCR Adenosylhomocysteinase (ISS) [Ostreococcus tauri] >gi|116059716|emb|CAL55423.1| SAHH_PETCR Adenosylhomocysteinase (ISS) [Ostreococcus tauri]	sp|P83783|SAHH_CANAL	146	3e-35	Adenosylhomocysteinase OS=Candida albicans GN=SAH1 PE=1 SV=2	YER043c	141	3e-34	COG0499	S-adenosylhomocysteine hydrolase	K01251	1e-36	148	zma:100274418	adenosylhomocysteinase [EC:3.3.1.1]	GO:0044237//cellular metabolic process	GO:0016802	GO:0044464//cell part
Unigene8513_All	methionine salvage pathway	s-methyl-5-thioribose kinase activity	1752	52.2645	35.2772	-0.567095				gi|90399159|emb|CAJ86088.1|	738	0	H0818H01.10 [Oryza sativa Indica Group]	sp|Q7XR61|MTK1_ORYSJ	737	0	Methylthioribose kinase 1 OS=Oryza sativa subsp. japonica GN=MTK1 PE=2 SV=1	mll7285	321	3e-87	COG4857	Predicted kinase	K13171	6e-07	53.5	rcu:RCOM_0733150	serine/arginine repetitive matrix protein 1	-	-	-
Unigene30904_All	seed maturation	seed maturation protein, putative, expressed	693	2.7244	0.6995	-1.96154				gi|195621438|gb|ACG32549.1|	198	6e-50	seed maturation protein [Zea mays]	sp|Q9SUR3|RTNLA_ARATH	149	2e-35	Reticulon-like protein B1 OS=Arabidopsis thaliana GN=RTNLB1 PE=1 SV=1	--	--	--	--	--	--	--	--	--	--	-	-	GO:0031410//cytoplasmic vesicle;GO:0043231//intracellular membrane-bounded organelle
Unigene21362_All	seed maturation	seed maturation protein, putative, expressed	662	6.4169	3.2951	-0.961554				gi|115450068|ref|NP_001048635.1|	295	4e-79	Os02g0833400 [Oryza sativa Japonica Group] >gi|50251416|dbj|BAD28454.1| seed maturation-like protein [Oryza sativa Japonica Group] >gi|113538166|dbj|BAF10549.1| Os02g0833400 [Oryza sativa Japonica Group]	sp|Q9FFW5|PERK8_ARATH	51.2	6e-06	Proline-rich receptor-like protein kinase PERK8 OS=Arabidopsis thaliana GN=PERK8 PE=1 SV=1	--	--	--	--	--	--	--	--	--	--	-	-	-
Unigene13952_All	seed maturation	seed maturation protein, putative, expressed	1025	22.9091	11.9414	-0.939949				gi|115461218|ref|NP_001054209.1|	320	2e-86	Os04g0670000 [Oryza sativa Japonica Group] >gi|38345298|emb|CAE02821.2| OSJNBa0043A12.26 [Oryza sativa Japonica Group] >gi|113565780|dbj|BAF16123.1| Os04g0670000 [Oryza sativa Japonica Group]	sp|Q9LT71|RTNLK_ARATH	181	6e-45	Reticulon-like protein B11 OS=Arabidopsis thaliana GN=RTNLB11 PE=2 SV=1	--	--	--	--	--	--	--	--	--	--	-	-
Unigene7906_All	seed maturation	seed maturation protein, putative, expressed	258	55.3407	30.062	-0.8804				gi|226502402|ref|NP_001150474.1|	71.2	3e-12	seed maturation protein [Zea mays] >gi|195639516|gb|ACG39226.1| seed maturation protein [Zea mays]	--	--	--	--	--	--	--	--	--	--	--	--	--	--	-	-	-
Unigene6886_All	seed maturation	seed maturation protein, putative, expressed	1396	246.48	164.333	-0.584852				gi|226529557|ref|NP_001149653.1|	424	1e-117	LOC100283279 [Zea mays] >gi|195629032|gb|ACG36248.1| seed maturation protein [Zea mays]	sp|Q9SUR3|RTNLA_ARATH	338	7e-92	Reticulon-like protein B1 OS=Arabidopsis thaliana GN=RTNLB1 PE=1 SV=1	--	--	--	--	--	--	--	--	--	--	-	-	GO:0031090//organelle membrane;GO:0043231//intracellular membrane-bounded organelle
Unigene321_All	seed maturation	seed maturation protein, putative, expressed	1177	22.5572	16.3711	-0.462437				gi|226529557|ref|NP_001149653.1|	412	1e-114	LOC100283279 [Zea mays] >gi|195629032|gb|ACG36248.1| seed maturation protein [Zea mays]	sp|Q9SUR3|RTNLA_ARATH	335	4e-91	Reticulon-like protein B1 OS=Arabidopsis thaliana GN=RTNLB1 PE=1 SV=1	DR2133	49.7	1e-05	COG4372	Uncharacterized protein conserved in bacteria with the myosin-like domain	K13171	1e-07	55.1	ath:AT2G29210	serine/arginine repetitive matrix protein 1	-	-	-
Unigene16798_All	seed maturation	seed maturation protein, putative, expressed	1113	15.0547	12.7394	-0.240917				gi|115470537|ref|NP_001058867.1|	384	1e-105	Os07g0142000 [Oryza sativa Japonica Group] >gi|113610403|dbj|BAF20781.1| Os07g0142000 [Oryza sativa Japonica Group]	sp|Q9SS37|RTNLH_ARATH	239	2e-62	Reticulon-like protein B8 OS=Arabidopsis thaliana GN=RTNLB8 PE=1 SV=1	--	--	--	--	--	--	--	--	--	--	-	-	-
Unigene494_All	seed maturation	seed maturation protein, putative, expressed	1304	51.4889	46.4676	-0.148036				gi|195620224|gb|ACG31942.1|	393	1e-108	seed maturation protein [Zea mays] >gi|195620480|gb|ACG32070.1| seed maturation protein [Zea mays]	sp|Q9SS37|RTNLH_ARATH	248	5e-65	Reticulon-like protein B8 OS=Arabidopsis thaliana GN=RTNLB8 PE=1 SV=1	--	--	--	--	--	--	--	--	--	--	-	-	GO:0043231//intracellular membrane-bounded organelle
Unigene11390_All	seed maturation	seed maturation protein, putative, expressed	365	219.834	206.185	-0.0924765				gi|226499754|ref|NP_001152685.1|	130	6e-30	LOC100286326 [Zea mays] >gi|195658019|gb|ACG48477.1| seed maturation protein [Zea mays] >gi|195658953|gb|ACG48944.1| seed maturation protein [Zea mays]	sp|Q9FPQ6|GP1_CHLRE	62	1e-09	Vegetative cell wall protein gp1 OS=Chlamydomonas reinhardtii GN=GP1 PE=2 SV=1	DR0479	48.1	4e-06	COG0744	Membrane carboxypeptidase (penicillin-binding protein)	K11596	5e-12	66.6	ppp:PHYPADRAFT_205541	argonaute	-	-	-
Unigene16607_All	seed maturation	seed maturation protein, putative, expressed	796	520.027	512.003	-0.0224354				gi|226500792|ref|NP_001151554.1|	129	3e-29	seed maturation protein PM41 [Zea mays] >gi|195647662|gb|ACG43299.1| seed maturation protein PM41 [Zea mays]	sp|Q8BTI8|SRRM2_MOUSE	51.6	6e-06	Serine/arginine repetitive matrix protein 2 OS=Mus musculus GN=Srrm2 PE=1 SV=2	--	--	--	--	--	--	--	--	--	--	-	-	-
Unigene13272_All	seed maturation	seed maturation protein, putative, expressed	929	35.4379	35.0909	-0.0141962				gi|115452581|ref|NP_001049891.1|	379	1e-104	Os03g0306900 [Oryza sativa Japonica Group] >gi|113548362|dbj|BAF11805.1| Os03g0306900 [Oryza sativa Japonica Group]	sp|Q9ASY9|PM36_ARATH	257	9e-68	Seed maturation protein PM36 homolog OS=Arabidopsis thaliana GN=At3g16990 PE=1 SV=3	PAB1642	70.5	4e-12	COG0819	Putative transcription activator	--	--	--	--	--	-	-	-
Unigene31023_All	seed maturation	seed maturation protein, putative, expressed	214	15.9906	15.8563	-0.0121679				gi|226499754|ref|NP_001152685.1|	70.1	7e-12	LOC100286326 [Zea mays] >gi|195658019|gb|ACG48477.1| seed maturation protein [Zea mays] >gi|195658953|gb|ACG48944.1| seed maturation protein [Zea mays]	--	--	--	--	--	--	--	--	--	--	--	--	--	--	GO:0007275//multicellular organismal development	-	-
Unigene3632_All	seed maturation	seed maturation protein, putative, expressed	390	126.774	134.549	0.0858805				gi|226491265|ref|NP_001150746.1|	66.2	1e-10	seed maturation protein [Zea mays] >gi|195641444|gb|ACG40190.1| seed maturation protein [Zea mays]	sp|P46515|LEA11_HELAN	52.8	7e-07	11 kDa late embryogenesis abundant protein OS=Helianthus annuus PE=2 SV=1	--	--	--	--	--	--	--	--	--	--	-	-	-
Unigene19429_All	seed maturation	seed maturation protein, putative, expressed	1068	285.607	349.492	0.291231				gi|115468228|ref|NP_001057713.1|	403	1e-111	Os06g0503400 [Oryza sativa Japonica Group] >gi|113595753|dbj|BAF19627.1| Os06g0503400 [Oryza sativa Japonica Group]	sp|Q9SUR3|RTNLA_ARATH	258	5e-68	Reticulon-like protein B1 OS=Arabidopsis thaliana GN=RTNLB1 PE=1 SV=1	--	--	--	--	--	--	--	--	--	--	-	-	-
Unigene37350_All	seed maturation	seed maturation protein, putative, expressed	427	10.7774	13.3392	0.307663				gi|297609152|ref|NP_001062753.2|	116	7e-26	Os09g0278000 [Oryza sativa Japonica Group] >gi|255678735|dbj|BAF24667.2| Os09g0278000 [Oryza sativa Japonica Group]	sp|Q01417|PM1_SOYBN	79.3	7e-15	18 kDa seed maturation protein OS=Glycine max GN=GMPM1 PE=2 SV=1	DR0479	60.8	7e-10	COG0744	Membrane carboxypeptidase (penicillin-binding protein)	--	--	--	--	--	-	-	-
Unigene19663_All	seed maturation	seed maturation protein, putative, expressed	629	29.0777	36.7994	0.339769				gi|115475924|ref|NP_001061558.1|	95.5	4e-19	Os08g0327700 [Oryza sativa Japonica Group] >gi|113623527|dbj|BAF23472.1| Os08g0327700 [Oryza sativa Japonica Group]	sp|Q01417|PM1_SOYBN	67.4	7e-11	18 kDa seed maturation protein OS=Glycine max GN=GMPM1 PE=2 SV=1	--	--	--	--	--	K13171	4e-07	52	vvi:100262120	serine/arginine repetitive matrix protein 1	-	-	-
Unigene10335_All	seed maturation	seed maturation protein, putative, expressed	254	6.9685	9.0652	0.379491				gi|226529970|ref|NP_001150885.1|	93.2	8e-19	seed maturation protein [Zea mays] >gi|195642626|gb|ACG40781.1| seed maturation protein [Zea mays]	sp|Q9LJQ5|RTNLI_ARATH	55.5	1e-07	Reticulon-like protein B9 OS=Arabidopsis thaliana GN=RTNLB9 PE=2 SV=1	--	--	--	--	--	--	--	--	--	--	-	-	-
Unigene27989_All	seed maturation	seed maturation protein, putative, expressed	213	5.5399	7.9654	0.523887				gi|226532814|ref|NP_001150766.1|	90.5	5e-18	LOC100284399 [Zea mays] >gi|195641660|gb|ACG40298.1| seed maturation protein [Zea mays]	sp|Q9M392|RTNLL_ARATH	64.3	2e-10	Reticulon-like protein B12 OS=Arabidopsis thaliana GN=RTNLB12 PE=2 SV=1	--	--	--	--	--	--	--	--	--	--	-	-	GO:0043231//intracellular membrane-bounded organelle
Unigene13557_All	seed maturation	seed maturation protein, putative, expressed	643	3.6703	7.9158	1.10884				gi|115450068|ref|NP_001048635.1|	189	2e-47	Os02g0833400 [Oryza sativa Japonica Group] >gi|50251416|dbj|BAD28454.1| seed maturation-like protein [Oryza sativa Japonica Group] >gi|113538166|dbj|BAF10549.1| Os02g0833400 [Oryza sativa Japonica Group]	--	--	--	--	--	--	--	--	--	--	--	--	--	--	-	-	-
Unigene40061_All	seed maturation	seed maturation protein, putative, expressed	1101	0.2143	1.6511	2.94572				gi|226502402|ref|NP_001150474.1|	394	1e-108	seed maturation protein [Zea mays] >gi|195639516|gb|ACG39226.1| seed maturation protein [Zea mays]	sp|Q9SUR3|RTNLA_ARATH	299	2e-80	Reticulon-like protein B1 OS=Arabidopsis thaliana GN=RTNLB1 PE=1 SV=1	--	--	--	--	--	--	--	--	--	--	-	-	GO:0031410//cytoplasmic vesicle;GO:0043231//intracellular membrane-bounded organelle
Unigene28596_All	seed maturation	seed maturation protein, putative, expressed	1023	0.2307	0	-7.8499				gi|226502402|ref|NP_001150474.1|	376	1e-103	seed maturation protein [Zea mays] >gi|195639516|gb|ACG39226.1| seed maturation protein [Zea mays]	sp|Q9SUR3|RTNLA_ARATH	294	6e-79	Reticulon-like protein B1 OS=Arabidopsis thaliana GN=RTNLB1 PE=1 SV=1	--	--	--	--	--	--	--	--	--	--	-	-	GO:0031410//cytoplasmic vesicle;GO:0043231//intracellular membrane-bounded organelle
Unigene14765_All	seed specific	seed specific protein Bn15D17A, putative	1356	8.3539	6.5241	-0.356671				gi|195626864|gb|ACG35262.1|	268	1e-70	seed specific protein Bn15D17A [Zea mays]	sp|Q9M886|LBD41_ARATH	231	9e-60	LOB domain-containing protein 41 OS=Arabidopsis thaliana GN=LBD41 PE=2 SV=1	Rv3876	62	2e-09	COG0455	ATPases involved in chromosome partitioning	K03006	6e-14	76.3	cre:CHLREDRAFT_196948	DNA-directed RNA polymerase II subunit A [EC:2.7.7.6]	-	-	-
Unigene30975_All	seed specific	seed specific protein Bn15D17A, putative	1208	0.1954	0.2006	0.0378911				gi|195626864|gb|ACG35262.1|	255	9e-67	seed specific protein Bn15D17A [Zea mays]	sp|Q9M886|LBD41_ARATH	214	1e-54	LOB domain-containing protein 41 OS=Arabidopsis thaliana GN=LBD41 PE=2 SV=1	YDL140c	70.1	7e-12	COG0086	DNA-directed RNA polymerase, beta' subunit/160 kD subunit	K03006	9e-14	75.5	cre:CHLREDRAFT_196948	DNA-directed RNA polymerase II subunit A [EC:2.7.7.6]	-	-	-
Unigene6029_All	seed specific	seed specific protein Bn15D17A, putative	332	12.4397	13.8709	0.15711				gi|195626864|gb|ACG35262.1|	73.6	7e-13	seed specific protein Bn15D17A [Zea mays]	sp|Q6ZQP7|YV021_HUMAN	66.2	6e-11	Uncharacterized protein LOC284861 OS=Homo sapiens PE=2 SV=1	--	--	--	--	--	K12826	8e-07	49.3	zma:100272589	splicing factor 3A subunit 2	-	-	-
Unigene17583_All	seed specific	seed specific protein Bn15D17A, putative	673	33.4886	37.8149	0.175285				gi|226507372|ref|NP_001149625.1|	63.5	2e-09	seed specific protein Bn15D17A [Zea mays] >gi|195628594|gb|ACG36127.1| seed specific protein Bn15D17A [Zea mays]	sp|P06921|VE2_HPV05	51.6	5e-06	Regulatory protein E2 OS=Human papillomavirus type 5 GN=E2 PE=3 SV=2	--	--	--	--	--	--	--	--	--	--	-	-	-
Unigene38455_All	seed specific	seed specific protein Bn15D17A, putative	545	9.9596	12.897	0.372876				gi|195626864|gb|ACG35262.1|	192	1e-48	seed specific protein Bn15D17A [Zea mays]	sp|Q9M886|LBD41_ARATH	176	8e-44	LOB domain-containing protein 41 OS=Arabidopsis thaliana GN=LBD41 PE=2 SV=1	DR2133	56.2	3e-08	COG4372	Uncharacterized protein conserved in bacteria with the myosin-like domain	K03006	4e-08	55.1	cre:CHLREDRAFT_196948	DNA-directed RNA polymerase II subunit A [EC:2.7.7.6]	-	-	-
Unigene7384_All	seed specific	seed specific protein Bn15D17A, putative	586	41.0782	56.6645	0.464072				gi|195626864|gb|ACG35262.1|	62.4	3e-09	seed specific protein Bn15D17A [Zea mays]	--	--	--	--	--	--	--	--	--	--	--	--	--	--	-	-	-
Unigene3451_All	seed specific	seed specific protein Bn15D17A, putative	584	67.4859	97.7386	0.534342				gi|195626864|gb|ACG35262.1|	185	4e-46	seed specific protein Bn15D17A [Zea mays]	sp|Q9M886|LBD41_ARATH	168	3e-41	LOB domain-containing protein 41 OS=Arabidopsis thaliana GN=LBD41 PE=2 SV=1	DR2133	53.1	3e-07	COG4372	Uncharacterized protein conserved in bacteria with the myosin-like domain	K03006	3e-08	55.5	cre:CHLREDRAFT_196948	DNA-directed RNA polymerase II subunit A [EC:2.7.7.6]	-	-	-
Unigene16823_All	seed specific	seed specific protein Bn15D17A, putative	729	0.1619	0	-7.339				gi|195626864|gb|ACG35262.1|	198	5e-50	seed specific protein Bn15D17A [Zea mays]	sp|Q9M886|LBD41_ARATH	185	3e-46	LOB domain-containing protein 41 OS=Arabidopsis thaliana GN=LBD41 PE=2 SV=1	DRA0210	52	1e-06	COG0747	ABC-type dipeptide transport system, periplasmic component	K03006	9e-07	51.2	cre:CHLREDRAFT_196948	DNA-directed RNA polymerase II subunit A [EC:2.7.7.6]	-	-	-
Unigene33731_All	seed specific	seed specific protein Bn15D17A, putative	253	3.2648	0	-11.6728				gi|32395577|gb|AAP37970.1|	124	3e-28	seed specific protein Bn15D17A [Brassica napus]	sp|Q9ZW96|LBD40_ARATH	124	2e-28	LOB domain-containing protein 40 OS=Arabidopsis thaliana GN=LBD40 PE=2 SV=1	--	--	--	--	--	--	--	--	--	--	-	-	-
Unigene6741_All	seed storage	protease inhibitor/seed storage/LTP family protein, expressed	1069	3.5323	2.2673	-0.639633				gi|195637318|gb|ACG38127.1|	162	5e-39	lipid binding protein [Zea mays]	sp|Q6ASY2|NLTL1_ORYSJ	59.3	5e-08	Non-specific lipid transfer protein-like 1 OS=Oryza sativa subsp. japonica GN=LTPL1 PE=1 SV=1	--	--	--	--	--	K11596	1e-06	36.6	osa:4342603	argonaute	-	-	GO:0031410//cytoplasmic vesicle
Unigene15531_All	seed storage	protease inhibitor/seed storage/LTP family protein, expressed	675	29.3687	23.1603	-0.342625				gi|115469910|ref|NP_001058554.1|	138	5e-32	Os06g0711900 [Oryza sativa Japonica Group] >gi|113596594|dbj|BAF20468.1| Os06g0711900 [Oryza sativa Japonica Group]	sp|Q9FFY3|VAS_ARATH	60.8	8e-09	Lipid transfer-like protein VAS OS=Arabidopsis thaliana GN=VAS PE=2 SV=1	--	--	--	--	--	--	--	--	--	--	-	-	-
Unigene30978_All	seed storage	protease inhibitor/seed storage/LTP family protein, expressed	949	0.4974	0	-8.9583				gi|195637318|gb|ACG38127.1|	162	4e-39	lipid binding protein [Zea mays]	sp|Q6ASY2|NLTL1_ORYSJ	59.3	4e-08	Non-specific lipid transfer protein-like 1 OS=Oryza sativa subsp. japonica GN=LTPL1 PE=1 SV=1	--	--	--	--	--	K11596	9e-07	36.6	osa:4342603	argonaute	-	-	GO:0031410//cytoplasmic vesicle
Unigene32994_All	starch degradation	hexokinase	341	2.7683	0.3554	-2.96148				gi|115471051|ref|NP_001059124.1|	205	1e-52	Os07g0197100 [Oryza sativa Japonica Group] >gi|75133408|sp|Q6Z398.1|HXK4_ORYSJ RecName: Full=Hexokinase-4, chloroplastic; AltName: Full=Hexokinase II; Flags: Precursor >gi|13991927|gb|AAK51560.1|AF372832_1 hexokinase II [Oryza sativa] >gi|34394076|dbj|BAC84178.1| hexokinase II [Oryza sativa Japonica Group] >gi|50508490|dbj|BAD30694.1| hexokinase II [Oryza sativa Japonica Group] >gi|73918009|gb|AA…	sp|Q6Z398|HXK4_ORYSJ	205	6e-53	Hexokinase-4, chloroplastic OS=Oryza sativa subsp. japonica GN=HXK4 PE=2 SV=1	SPAC24H6.04	82.8	1e-16	COG5026	Hexokinase	K00844	7e-54	205	osa:4342654	hexokinase [EC:2.7.1.1]	GO:0006007//glucose catabolic process	GO:0004396//hexokinase activity;GO:0032559//adenyl ribonucleotide binding	GO:0009532//plastid stroma
Unigene3798_All	starch degradation	4-alpha-glucanotransferase	214	11.5794	3.9641	-1.5465				gi|229610915|emb|CAX51389.1|	151	2e-36	disproportionating enzyme [Hordeum vulgare subsp. vulgare]	sp|Q69Q02|DPE2_ORYSJ	125	1e-28	4-alpha-glucanotransferase DPE2 OS=Oryza sativa subsp. japonica GN=DPE2 PE=2 SV=1	--	--	--	--	--	K00705	2e-32	134	sbi:SORBI_02g042100	4-alpha-glucanotransferase [EC:2.4.1.25]	-	-	-
Unigene21904_All	starch degradation	hexokinase	386	6.4196	2.1977	-1.54649				gi|110808553|sp|Q2KNB4.1|HXK3_ORYSJ	183	6e-46	RecName: Full=Hexokinase-3; AltName: Full=Hexokinase-8 >gi|62130768|gb|AAX68424.1| hexokinase 8 [Oryza sativa Japonica Group] >gi|73918007|gb|AAZ93620.1| hexokinase 3 [Oryza sativa Japonica Group]	sp|Q2KNB4|HXK3_ORYSJ	183	3e-46	Hexokinase-3 OS=Oryza sativa subsp. japonica GN=HXK3 PE=2 SV=1	YCL040w	94.7	4e-20	COG5026	Hexokinase	K00844	9e-45	175	sbi:SORBI_03g045420	hexokinase [EC:2.7.1.1]	GO:0006007//glucose catabolic process	GO:0016773//phosphotransferase activity, alcohol group as acceptor;GO:0032559//adenyl ribonucleotide binding	-
Unigene32381_All	starch degradation	4-alpha-glucanotransferase	259	3.6448	1.4037	-1.37661				gi|71084351|gb|AAZ23612.1|	181	3e-45	disproportionating enzyme [Triticum aestivum]	sp|Q8LI30|DPE1_ORYSJ	168	1e-41	4-alpha-glucanotransferase DPE1, chloroplastic/amyloplastic OS=Oryza sativa subsp. japonica GN=DPE1 PE=2 SV=2	aq_723	79.7	1e-15	COG1640	4-alpha-glucanotransferase	K00705	2e-41	164	zma:100381522	4-alpha-glucanotransferase [EC:2.4.1.25]	-	-	-
Unigene34100_All	starch degradation	beta-amylase	344	3.0872	1.4092	-1.13142				gi|4138596|emb|CAA76131.1|	230	3e-60	beta-amylase [Triticum aestivum]	sp|P93594|AMYB_WHEAT	175	9e-44	Beta-amylase OS=Triticum aestivum GN=BMY1 PE=2 SV=1	--	--	--	--	--	K01177	1e-34	141	osa:4349417	beta-amylase [EC:3.2.1.2]	GO:0005976//polysaccharide metabolic process	GO:0016160//amylase activity;GO:0046872//metal ion binding	GO:0043231//intracellular membrane-bounded organelle
Unigene29038_All	starch degradation	phosphorylase	432	7.1018	3.3663	-1.07702				gi|300681424|emb|CBH32516.1|	283	6e-76	alpha-glucan phosphorylase, H isozyme,expressed [Triticum aestivum]	sp|Q9LKJ3|PHSH_WHEAT	283	3e-76	Alpha-glucan phosphorylase, H isozyme OS=Triticum aestivum PE=2 SV=1	YPR160w	153	9e-38	COG0058	Glucan phosphorylase	K00688	3e-75	277	osa:4324810	starch phosphorylase [EC:2.4.1.1]	GO:0006950//response to stress;GO:0044238//primary metabolic process;GO:0010038//response to metal ion	GO:0048037//cofactor binding;GO:0016758//transferase activity, transferring hexosyl groups	GO:0009536//plastid
Unigene11340_All	starch degradation	hexokinase	761	51.4793	26.2759	-0.970252				gi|195649643|gb|ACG44289.1|	440	1e-122	hexokinase-2 [Zea mays]	sp|Q5W676|HXK5_ORYSJ	412	1e-114	Hexokinase-5 OS=Oryza sativa subsp. japonica GN=HXK5 PE=2 SV=1	SPAC24H6.04	136	3e-32	COG5026	Hexokinase	K00844	1e-123	439	sbi:SORBI_09g026080	hexokinase [EC:2.7.1.1]	-	-	-
Unigene12262_All	starch degradation	4-alpha-glucanotransferase	276	8.5507	4.8299	-0.824049				gi|71084355|gb|AAZ23614.1|	197	3e-50	disproportionating enzyme [Aegilops tauschii]	sp|Q8LI30|DPE1_ORYSJ	182	6e-46	4-alpha-glucanotransferase DPE1, chloroplastic/amyloplastic OS=Oryza sativa subsp. japonica GN=DPE1 PE=2 SV=2	PAE1209	115	2e-26	COG1640	4-alpha-glucanotransferase	K00705	5e-48	186	sbi:SORBI_02g040000	4-alpha-glucanotransferase [EC:2.4.1.25]	-	-	-
Unigene13482_All	starch degradation	phosphorylase	598	18.1537	10.9434	-0.730203				gi|300681424|emb|CBH32516.1|	394	1e-109	alpha-glucan phosphorylase, H isozyme,expressed [Triticum aestivum]	sp|Q9LKJ3|PHSH_WHEAT	390	3e-108	Alpha-glucan phosphorylase, H isozyme OS=Triticum aestivum PE=2 SV=1	STM3514	171	1e-42	COG0058	Glucan phosphorylase	K00688	3e-107	384	osa:4324810	starch phosphorylase [EC:2.4.1.1]	-	-	-
Unigene431_All	starch degradation	beta-amylase	1670	53.5589	32.873	-0.704223				gi|31433554|gb|AAP55052.1|	811	0	Glycosyl hydrolase family 14 protein, expressed [Oryza sativa Japonica Group]	sp|O23553|BAM3_ARATH	699	0	Beta-amylase 3, chloroplastic OS=Arabidopsis thaliana GN=BAM3 PE=1 SV=3	DR2133	58.2	4e-08	COG4372	Uncharacterized protein conserved in bacteria with the myosin-like domain	K01177	0	766	osa:4349417	beta-amylase [EC:3.2.1.2]	GO:0005982//starch metabolic process;GO:0006950//response to stress;GO:0000023//maltose metabolic process	GO:0016160//amylase activity;GO:0043167//ion binding	GO:0009532//plastid stroma
Unigene17007_All	starch degradation	phosphorylase	1632	14.6053	8.9851	-0.700886				gi|34485587|gb|AAQ73181.1|	882	0	plastidic alpha 1,4-glucan phosphorylase 3 [Triticum aestivum]	sp|P53535|PHSL2_SOLTU	717	0	Alpha-1,4 glucan phosphorylase L-2 isozyme, chloroplastic/amyloplastic OS=Solanum tuberosum GN=STP-1 PE=1 SV=1	sll1356	392	7e-109	COG0058	Glucan phosphorylase	K00688	0	793	osa:4334171	starch phosphorylase [EC:2.4.1.1]	-	-	-
Unigene8592_All	starch degradation	hexokinase	1298	66.7268	42.2943	-0.657803				gi|195649643|gb|ACG44289.1|	474	1e-132	hexokinase-2 [Zea mays]	sp|Q5W676|HXK5_ORYSJ	466	2e-130	Hexokinase-5 OS=Oryza sativa subsp. japonica GN=HXK5 PE=2 SV=1	SPAC24H6.04	158	2e-38	COG5026	Hexokinase	K00844	4e-134	475	sbi:SORBI_09g026080	hexokinase [EC:2.7.1.1]	-	-	-
Unigene13864_All	starch degradation	hexokinase	1032	16.122	10.921	-0.561926				gi|115439869|ref|NP_001044214.1|	626	1e-178	Os01g0742500 [Oryza sativa Japonica Group] >gi|75157445|sp|Q8LQ68.1|HXK6_ORYSJ RecName: Full=Hexokinase-6; AltName: Full=Hexokinase-2 >gi|62130756|gb|AAX68418.1| hexokinase 2 [Oryza sativa Japonica Group] >gi|73918013|gb|AAZ93623.1| hexokinase 6 [Oryza sativa Japonica Group] >gi|113533745|dbj|BAF06128.1| Os01g0742500 [Oryza sativa Japonica Group]	sp|Q8LQ68|HXK6_ORYSJ	626	9e-179	Hexokinase-6 OS=Oryza sativa subsp. japonica GN=HXK6 PE=2 SV=1	SPAC24H6.04	234	1e-61	COG5026	Hexokinase	K00844	1e-179	626	osa:4326547	hexokinase [EC:2.7.1.1]	-	-	-
Unigene18504_All	starch degradation	phosphorylase	488	6.045	4.2217	-0.517918				gi|300681424|emb|CBH32516.1|	334	3e-91	alpha-glucan phosphorylase, H isozyme,expressed [Triticum aestivum]	sp|Q9LKJ3|PHSH_WHEAT	334	2e-91	Alpha-glucan phosphorylase, H isozyme OS=Triticum aestivum PE=2 SV=1	CPn0307	139	3e-33	COG0058	Glucan phosphorylase	K00688	4e-90	327	zma:100285259	starch phosphorylase [EC:2.4.1.1]	-	-	-
Unigene25231_All	starch degradation	hexokinase	905	8.3447	7.0972	-0.23361				gi|115442149|ref|NP_001045354.1|	493	1e-138	Os01g0940100 [Oryza sativa Japonica Group] >gi|113534885|dbj|BAF07268.1| Os01g0940100 [Oryza sativa Japonica Group]	sp|Q2KNB4|HXK3_ORYSJ	493	1e-138	Hexokinase-3 OS=Oryza sativa subsp. japonica GN=HXK3 PE=2 SV=1	SPAC24H6.04	160	2e-39	COG5026	Hexokinase	K00844	5e-133	471	sbi:SORBI_03g045420	hexokinase [EC:2.7.1.1]	GO:0006970//response to osmotic stress;GO:0006007//glucose catabolic process	GO:0004396//hexokinase activity;GO:0032559//adenyl ribonucleotide binding	GO:0043231//intracellular membrane-bounded organelle
Unigene4884_All	starch degradation	hexokinase	882	6.1542	5.496	-0.163189				gi|73918015|gb|AAZ93624.1|	238	8e-62	hexokinase 7 [Oryza sativa Japonica Group]	sp|Q1WM16|HXK7_ORYSJ	238	4e-62	Hexokinase-7 OS=Oryza sativa subsp. japonica GN=HXK7 PE=2 SV=2	YCL040w	64.7	2e-10	COG5026	Hexokinase	K00844	2e-56	216	sbi:SORBI_09g005840	hexokinase [EC:2.7.1.1]	-	-	-
Unigene5364_All	starch degradation	hexokinase	570	23.3928	21.0484	-0.152354				gi|115439869|ref|NP_001044214.1|	67	1e-10	Os01g0742500 [Oryza sativa Japonica Group] >gi|75157445|sp|Q8LQ68.1|HXK6_ORYSJ RecName: Full=Hexokinase-6; AltName: Full=Hexokinase-2 >gi|62130756|gb|AAX68418.1| hexokinase 2 [Oryza sativa Japonica Group] >gi|73918013|gb|AAZ93623.1| hexokinase 6 [Oryza sativa Japonica Group] >gi|113533745|dbj|BAF06128.1| Os01g0742500 [Oryza sativa Japonica Group]	sp|Q8LQ68|HXK6_ORYSJ	67	8e-11	Hexokinase-6 OS=Oryza sativa subsp. japonica GN=HXK6 PE=2 SV=1	--	--	--	--	--	K00844	1e-11	67	osa:4326547	hexokinase [EC:2.7.1.1]	GO:0010468//regulation of gene expression;GO:0006007//glucose catabolic process	GO:0016773//phosphotransferase activity, alcohol group as acceptor;GO:0032559//adenyl ribonucleotide binding	-
Unigene19335_All	starch degradation	hexokinase	526	7.8517	7.1422	-0.136637				gi|195648488|gb|ACG43712.1|	176	1e-43	hexokinase-1 [Zea mays]	sp|Q1WM15|HXK8_ORYSJ	163	5e-40	Hexokinase-8 OS=Oryza sativa subsp. japonica GN=HXK8 PE=2 SV=2	SPAC24H6.04	69.7	3e-12	COG5026	Hexokinase	K00844	4e-45	177	zma:100192075	hexokinase [EC:2.7.1.1]	-	-	-
Unigene3962_All	starch degradation	4-alpha-glucanotransferase	686	15.1369	13.7794	-0.135557				gi|71084355|gb|AAZ23614.1|	373	1e-102	disproportionating enzyme [Aegilops tauschii]	sp|Q8LI30|DPE1_ORYSJ	330	4e-90	4-alpha-glucanotransferase DPE1, chloroplastic/amyloplastic OS=Oryza sativa subsp. japonica GN=DPE1 PE=2 SV=2	alr3871	181	8e-46	COG1640	4-alpha-glucanotransferase	K00705	4e-87	318	zma:100381522	4-alpha-glucanotransferase [EC:2.4.1.25]	-	-	-
Unigene13565_All	starch degradation	phosphorylase	346	3.7514	3.5025	-0.0990441				gi|183211902|gb|ACC59201.1|	229	1e-59	plastid alpha-1,4-glucan phosphorylase [Triticum aestivum]	sp|P27598|PHSL_IPOBA	207	2e-53	Alpha-1,4 glucan phosphorylase L isozyme, chloroplastic/amyloplastic OS=Ipomoea batatas PE=2 SV=1	YPR160w	124	4e-29	COG0058	Glucan phosphorylase	K00688	1e-53	204	vvi:100245621	starch phosphorylase [EC:2.4.1.1]	-	-	-
Unigene17832_All	starch degradation	phosphorylase	470	3.2638	3.0942	-0.0769862				gi|183211902|gb|ACC59201.1|	327	4e-89	plastid alpha-1,4-glucan phosphorylase [Triticum aestivum]	sp|P04045|PHSL1_SOLTU	268	8e-72	Alpha-1,4 glucan phosphorylase L-1 isozyme, chloroplastic/amyloplastic OS=Solanum tuberosum PE=1 SV=2	YPR160w	151	4e-37	COG0058	Glucan phosphorylase	K00688	1e-72	268	pop:POPTR_712800	starch phosphorylase [EC:2.4.1.1]	-	-	-
Unigene14369_All	starch degradation	4-alpha-glucanotransferase	914	20.269	19.8886	-0.0273332				gi|229610915|emb|CAX51389.1|	429	1e-119	disproportionating enzyme [Hordeum vulgare subsp. vulgare]	sp|Q69Q02|DPE2_ORYSJ	368	3e-101	4-alpha-glucanotransferase DPE2 OS=Oryza sativa subsp. japonica GN=DPE2 PE=2 SV=1	L94405	152	1e-36	COG1640	4-alpha-glucanotransferase	K00705	2e-104	376	sbi:SORBI_02g042100	4-alpha-glucanotransferase [EC:2.4.1.25]	-	-	-
Unigene4331_All	starch degradation	hexokinase	1492	26.6526	26.9667	0.0169027				gi|110808554|sp|Q1WM16.2|HXK7_ORYSJ	674	0	RecName: Full=Hexokinase-7; AltName: Full=Hexokinase-6 >gi|62130764|gb|AAX68422.1| hexokinase 6 [Oryza sativa Japonica Group]	sp|Q1WM16|HXK7_ORYSJ	674	0	Hexokinase-7 OS=Oryza sativa subsp. japonica GN=HXK7 PE=2 SV=2	SPAC24H6.04	253	6e-67	COG5026	Hexokinase	K00844	0	659	sbi:SORBI_09g005840	hexokinase [EC:2.7.1.1]	-	-	-
Unigene8247_All	starch degradation	hexokinase	381	5.2651	5.4073	0.0384475				gi|115435012|ref|NP_001042264.1|	241	2e-63	Os01g0190400 [Oryza sativa Japonica Group] >gi|113531795|dbj|BAF04178.1| Os01g0190400 [Oryza sativa Japonica Group]	sp|Q1WM15|HXK8_ORYSJ	241	1e-63	Hexokinase-8 OS=Oryza sativa subsp. japonica GN=HXK8 PE=2 SV=2	SPAC24H6.04	104	4e-23	COG5026	Hexokinase	K00844	1e-64	241	osa:4326776	hexokinase [EC:2.7.1.1]	GO:0006007//glucose catabolic process	GO:0016773//phosphotransferase activity, alcohol group as acceptor;GO:0032559//adenyl ribonucleotide binding	-
Unigene12440_All	starch degradation	4-alpha-glucanotransferase	379	8.4063	9.2729	0.14155				gi|71084353|gb|AAZ23613.1|	262	1e-69	disproportionating enzyme [Aegilops tauschii]	sp|Q8LI30|DPE1_ORYSJ	213	3e-55	4-alpha-glucanotransferase DPE1, chloroplastic/amyloplastic OS=Oryza sativa subsp. japonica GN=DPE1 PE=2 SV=2	FN0858	84	6e-17	COG1640	4-alpha-glucanotransferase	K00705	1e-58	221	zma:100381522	4-alpha-glucanotransferase [EC:2.4.1.25]	-	-	-
Unigene9862_All	starch degradation	phosphorylase	996	22.3914	25.9166	0.210932				gi|229610905|emb|CAX51384.1|	464	1e-129	cytosolic alpha-glucan phosphorylase [Hordeum vulgare subsp. vulgare]	sp|Q9LKJ3|PHSH_WHEAT	461	5e-129	Alpha-glucan phosphorylase, H isozyme OS=Triticum aestivum PE=2 SV=1	YPO3938	216	5e-56	COG0058	Glucan phosphorylase	K00688	2e-123	439	osa:4324810	starch phosphorylase [EC:2.4.1.1]	-	-	-
Unigene12184_All	starch degradation	hexokinase	268	3.0821	3.6175	0.231079				gi|115439869|ref|NP_001044214.1|	114	4e-25	Os01g0742500 [Oryza sativa Japonica Group] >gi|75157445|sp|Q8LQ68.1|HXK6_ORYSJ RecName: Full=Hexokinase-6; AltName: Full=Hexokinase-2 >gi|62130756|gb|AAX68418.1| hexokinase 2 [Oryza sativa Japonica Group] >gi|73918013|gb|AAZ93623.1| hexokinase 6 [Oryza sativa Japonica Group] >gi|113533745|dbj|BAF06128.1| Os01g0742500 [Oryza sativa Japonica Group]	sp|Q8LQ68|HXK6_ORYSJ	114	2e-25	Hexokinase-6 OS=Oryza sativa subsp. japonica GN=HXK6 PE=2 SV=1	--	--	--	--	--	K00844	2e-26	114	osa:4326547	hexokinase [EC:2.7.1.1]	-	-	-
Unigene38326_All	starch degradation	phosphorylase	248	2.379	2.932	0.30153				gi|300681424|emb|CBH32516.1|	152	9e-37	alpha-glucan phosphorylase, H isozyme,expressed [Triticum aestivum]	sp|Q9LKJ3|PHSH_WHEAT	151	1e-36	Alpha-glucan phosphorylase, H isozyme OS=Triticum aestivum PE=2 SV=1	VCA0013	68.6	3e-12	COG0058	Glucan phosphorylase	K00688	2e-33	137	osa:4324810	starch phosphorylase [EC:2.4.1.1]	-	-	-
Unigene8579_All	starch degradation	beta-amylase	1954	93.1796	130.429	0.485174				gi|115450651|ref|NP_001048926.1|	908	0	Os03g0141200 [Oryza sativa Japonica Group] >gi|113547397|dbj|BAF10840.1| Os03g0141200 [Oryza sativa Japonica Group]	sp|Q9LIR6|BAM1_ARATH	691	0	Beta-amylase 1, chloroplastic OS=Arabidopsis thaliana GN=BAM1 PE=1 SV=1	YPO2725	78.6	4e-14	COG3501	Uncharacterized protein conserved in bacteria	K01177	1e-167	587	ath:AT4G17090	beta-amylase [EC:3.2.1.2]	-	-	-
Unigene12696_All	starch degradation	beta-amylase	1602	615.187	1114.67	0.857518				gi|464145|dbj|BAA04815.1|	1081	0	beta-amylase [Hordeum vulgare subsp. vulgare] >gi|1345367|dbj|BAA08741.1| beta-amylase [Hordeum vulgare subsp. vulgare] >gi|3779260|gb|AAC67246.1| beta-amylase [Hordeum vulgare subsp. spontaneum] >gi|283969677|gb|ADB54608.1| beta-amylase 1 [Hordeum vulgare subsp. spontaneum]	sp|P16098|AMYB_HORVU	1077	0	Beta-amylase OS=Hordeum vulgare GN=BMY1 PE=1 SV=1	--	--	--	--	--	K01177	2e-125	447	ath:AT4G17090	beta-amylase [EC:3.2.1.2]	-	-	-
Unigene40864_All	starch degradation	4-alpha-glucanotransferase	303	2.3366	5.5994	1.26086				gi|229610915|emb|CAX51389.1|	209	6e-54	disproportionating enzyme [Hordeum vulgare subsp. vulgare]	sp|Q69Q02|DPE2_ORYSJ	190	2e-48	4-alpha-glucanotransferase DPE2 OS=Oryza sativa subsp. japonica GN=DPE2 PE=2 SV=1	L94405	74.3	5e-14	COG1640	4-alpha-glucanotransferase	K00705	7e-51	195	sbi:SORBI_02g042100	4-alpha-glucanotransferase [EC:2.4.1.25]	GO:0005982//starch metabolic process;GO:0000023//maltose metabolic process	GO:0030247//polysaccharide binding;GO:0043167//ion binding;GO:0004133//glycogen debranching enzyme activity;GO:0016740//transferase activity	GO:0044444//cytoplasmic part
Unigene28310_All	starch synthesis	glycogen/starch synthases, ADP-glucose type family protein, expressed	308	6.8961	0.7869	-3.13153				gi|6492245|gb|AAF14233.1|AF109395_1	205	2e-52	granule-bound starch synthase GBSSII [Triticum aestivum]	sp|Q8LL05|SSG1B_HORVU	203	3e-52	Granule-bound starch synthase 1b, chloroplastic/amyloplastic (Fragment) OS=Hordeum vulgare PE=1 SV=1	TM0895	74.7	4e-14	COG0297	Glycogen synthase	K13679	2e-49	191	osa:4343010	granule-bound starch synthase [EC:2.4.1.242]	GO:0005982//starch metabolic process;GO:0005977//glycogen metabolic process	GO:0035251//UDP-glucosyltransferase activity	GO:0009536//plastid
Unigene1434_All	starch synthesis	Glucose-1-phosphate adenylyltransferase large subunit 1, chloroplast precursor, putative, expressed	1104	169.624	89.0246	-0.930064				gi|2583072|gb|AAB82604.1|	493	1e-138	ADP-glucose-pyrophosphorylase large subunit [Triticum aestivum]	sp|P12299|GLGL2_WHEAT	493	1e-138	Glucose-1-phosphate adenylyltransferase large subunit, chloroplastic/amyloplastic OS=Triticum aestivum GN=AGP-L PE=2 SV=2	all4645	276	4e-74	COG0448	ADP-glucose pyrophosphorylase	--	--	--	--	--	-	-	-
Unigene34326_All	starch synthesis	glycogen/starch synthases, ADP-glucose type family protein, expressed	341	3.1143	1.7769	-0.809545				gi|189096677|gb|ABY56823.2|	232	9e-61	starch synthase IIIb precursor [Triticum aestivum]	sp|Q43846|SSY3_SOLTU	177	1e-44	Soluble starch synthase 3, chloroplastic/amyloplastic OS=Solanum tuberosum GN=SS3 PE=1 SV=1	alr0031	89.4	1e-18	COG0297	Glycogen synthase	K00703	1e-31	131	olu:OSTLU_41853	starch synthase [EC:2.4.1.21]	-	-	-
Unigene16163_All	starch synthesis	glucose-6-phosphate isomerase	321	30.1431	17.3665	-0.795521				gi|115479643|ref|NP_001063415.1|	93.2	8e-19	Os09g0465600 [Oryza sativa Japonica Group] >gi|113631648|dbj|BAF25329.1| Os09g0465600 [Oryza sativa Japonica Group]	sp|Q8UZB4|ORF3_GFKVM	53.1	5e-07	Uncharacterized protein ORF3 OS=Grapevine fleck virus (isolate Italy/MT48) GN=ORF3 PE=4 SV=1	--	--	--	--	--	K01810	5e-20	93.2	osa:4347311	glucose-6-phosphate isomerase [EC:5.3.1.9]	-	-	-
Unigene12845_All	starch synthesis	glucose-6-phosphate isomerase	1987	41.3324	25.311	-0.707509				gi|115479643|ref|NP_001063415.1|	1043	0	Os09g0465600 [Oryza sativa Japonica Group] >gi|113631648|dbj|BAF25329.1| Os09g0465600 [Oryza sativa Japonica Group]	sp|B2J5F1|G6PI_NOSP7	657	0	Glucose-6-phosphate isomerase OS=Nostoc punctiforme (strain ATCC 29133 / PCC 73102) GN=pgi PE=3 SV=1	alr1050	653	0	COG0166	Glucose-6-phosphate isomerase	K01810	0	1043	osa:4347311	glucose-6-phosphate isomerase [EC:5.3.1.9]	GO:0006007//glucose catabolic process;GO:0006073//cellular glucan metabolic process;GO:0009908//flower development;GO:0002376//immune system process	GO:0003676//nucleic acid binding;GO:0016861//intramolecular oxidoreductase activity, interconverting aldoses and ketoses;GO:0032559//adenyl ribonucleotide binding	GO:0009532//plastid stroma;GO:0009526//plastid envelope
Unigene4315_All	starch synthesis	soluble starch synthase 2-3, chloroplast precursor, putative, expressed	2518	95.8334	63.9628	-0.583295				gi|23476267|gb|AAN28309.1|	1518	0	starch synthase II [Hordeum vulgare subsp. vulgare]	sp|P0C586|SSY23_ORYSI	1008	0	Soluble starch synthase 2-3, chloroplastic/amyloplastic OS=Oryza sativa subsp. indica GN=SSII-3 PE=1 SV=1	SP1124	290	8e-78	COG0297	Glycogen synthase	K00703	0	1018	sbi:SORBI_10g008200	starch synthase [EC:2.4.1.21]	-	-	-
Unigene12304_All	starch synthesis	soluble starch synthase 2-1, chloroplast precursor, putative, expressed	647	25.5331	17.2322	-0.567262				gi|189096679|gb|ABY56824.3|	433	1e-121	starch synthase IIb precursor [Triticum aestivum]	sp|Q6Z2T8|SSY22_ORYSJ	400	3e-111	Soluble starch synthase 2-2, chloroplastic/amyloplastic OS=Oryza sativa subsp. japonica GN=SSII-2 PE=2 SV=2	TM0895	125	6e-29	COG0297	Glycogen synthase	K00703	2e-113	405	zma:541656	starch synthase [EC:2.4.1.21]	-	-	-
Unigene21212_All	starch synthesis	soluble starch synthase 1, chloroplast precursor, putative, expressed	2099	59.871	41.5121	-0.528325				gi|7188796|gb|AAF37876.1|AF234163_1	1133	0	starch synthase I [Hordeum vulgare subsp. vulgare]	sp|Q43654|SSY1_WHEAT	1116	0	Starch synthase 1, chloroplastic/amyloplastic OS=Triticum aestivum GN=WSSI-2 PE=2 SV=2	SP1124	335	2e-91	COG0297	Glycogen synthase	K00703	0	1027	zma:541669	starch synthase [EC:2.4.1.21]	GO:0051707//response to other organism;GO:0005982//starch metabolic process;GO:0023033;GO:0009250//glucan biosynthetic process;GO:0005977//glycogen metabolic process	GO:0046527//glucosyltransferase activity	GO:0009532//plastid stroma
Unigene16679_All	starch synthesis	glycogen/starch synthases, ADP-glucose type family protein, expressed	920	11.4151	8.0353	-0.50652				gi|229610859|emb|CAX51361.1|	329	3e-89	soluble starch synthase [Hordeum vulgare subsp. vulgare]	sp|Q43846|SSY3_SOLTU	275	3e-73	Soluble starch synthase 3, chloroplastic/amyloplastic OS=Solanum tuberosum GN=SS3 PE=1 SV=1	alr0031	127	3e-29	COG0297	Glycogen synthase	K00703	2e-51	199	cre:CHLREDRAFT_191662	starch synthase [EC:2.4.1.21]	-	-	-
Unigene6062_All	starch synthesis	Glucose-1-phosphate adenylyltransferase large subunit 1, chloroplast precursor, putative, expressed	1092	98.4408	70.2489	-0.486781				gi|1707923|sp|P30524.2|GLGL1_HORVU	566	1e-160	RecName: Full=Glucose-1-phosphate adenylyltransferase large subunit 1, chloroplastic/amyloplastic; AltName: Full=ADP-glucose pyrophosphorylase; AltName: Full=ADP-glucose synthase; AltName: Full=AGPase S; AltName: Full=Alpha-D-glucose-1-phosphate adenyl transferase; AltName: Full=BEPL; Flags: Precursor >gi|1279513|emb|CAA47626.1| glucose-1-phosphate adenylyltransferase [Hordeum vulgare subsp. vulg…	sp|P30524|GLGL1_HORVU	566	9e-161	Glucose-1-phosphate adenylyltransferase large subunit 1, chloroplastic/amyloplastic OS=Hordeum vulgare PE=2 SV=2	all4645	230	4e-60	COG0448	ADP-glucose pyrophosphorylase	--	--	--	--	--	-	-	-
Unigene9575_All	starch synthesis	isoamylase-type starch debranching enzyme IsO2, putative, expressed or alpha-amylase	611	8.8837	6.7437	-0.39762				gi|41687960|dbj|BAD08581.1|	403	1e-112	85kDa isoamylase [Hordeum vulgare subsp. vulgare]	sp|Q8L735|ISOA2_ARATH	282	1e-75	Isoamylase 2, chloroplastic OS=Arabidopsis thaliana GN=ISA2 PE=1 SV=2	slr1857	164	1e-40	COG1523	Type II secretory pathway, pullulanase PulA and related glycosidases	K02438	3e-39	158	ppp:PHYPADRAFT_177616	glycogen operon protein GlgX [EC:3.2.1.-]	GO:0009250//glucan biosynthetic process	GO:0016798//hydrolase activity, acting on glycosyl bonds;GO:0043167//ion binding;GO:0004133//glycogen debranching enzyme activity	GO:0009536//plastid
Unigene5677_All	starch synthesis	alpha-amylase/subtilisin inhibitor, putative, expressed	987	109.152	85.9487	-0.344795				gi|115459526|ref|NP_001053363.1|	73.2	5e-12	Os04g0526600 [Oryza sativa Japonica Group] >gi|97536377|sp|P29421.2|IAAS_ORYSJ RecName: Full=Alpha-amylase/subtilisin inhibitor; AltName: Full=RASI; Flags: Precursor >gi|194368520|pdb|2QN4|A Chain A, Structure And Function Study Of Rice Bifunctional Alpha- AmylaseSUBTILISIN INHIBITOR FROM ORYZA SATIVA >gi|194368521|pdb|2QN4|B Chain B, Structure And Function Study Of Rice Bifunctional Alpha- Amyla…	sp|P29421|IAAS_ORYSJ	73.2	3e-12	Alpha-amylase/subtilisin inhibitor OS=Oryza sativa subsp. japonica GN=RASI PE=1 SV=2	--	--	--	--	--	--	--	--	--	--	-	GO:0030414//protease inhibitor activity	-
Unigene512_All	starch synthesis	Glucose-1-phosphate adenylyltransferase large subunit 1, chloroplast precursor, putative, expressed	1151	79.1446	71.4912	-0.146725				gi|229610841|emb|CAX51352.1|	488	1e-137	small subunit of ADP-glucose pyrophosphorylase [Hordeum vulgare subsp. vulgare]	sp|P55238|GLGS_HORVU	488	3e-137	Glucose-1-phosphate adenylyltransferase small subunit, chloroplastic/amyloplastic OS=Hordeum vulgare PE=2 SV=1	all4645	300	3e-81	COG0448	ADP-glucose pyrophosphorylase	K00975	7e-133	471	osa:4345339	glucose-1-phosphate adenylyltransferase [EC:2.7.7.27]	-	-	-
Unigene19920_All	starch synthesis	isoamylase-type starch debranching enzyme IsO2, putative, expressed or alpha-amylase	520	4.9923	4.6611	-0.0990342				gi|229610875|emb|CAX51369.1|	341	3e-93	isoamylase [Hordeum vulgare subsp. vulgare]	sp|Q8L735|ISOA2_ARATH	143	5e-34	Isoamylase 2, chloroplastic OS=Arabidopsis thaliana GN=ISA2 PE=1 SV=2	--	--	--	--	--	K02438	7e-14	73.9	olu:OSTLU_19757	glycogen operon protein GlgX [EC:3.2.1.-]	-	-	-
Unigene611_All	starch synthesis	glycogen/starch synthases, ADP-glucose type family protein, expressed	859	7.9674	7.9005	-0.012165				gi|42559831|sp|Q8LL05.1|SSG1B_HORVU	426	1e-118	RecName: Full=Granule-bound starch synthase 1b, chloroplastic/amyloplastic; AltName: Full=Granule-bound starch synthase Ib; Flags: Precursor >gi|21667442|gb|AAM74054.1|AF486521_1 granule bound starch synthase Ib precursor [Hordeum vulgare]	sp|Q8LL05|SSG1B_HORVU	426	1e-118	Granule-bound starch synthase 1b, chloroplastic/amyloplastic (Fragment) OS=Hordeum vulgare PE=1 SV=1	L98347	126	4e-29	COG0297	Glycogen synthase	K13679	8e-112	400	osa:4343010	granule-bound starch synthase [EC:2.4.1.242]	GO:0005977//glycogen metabolic process	GO:0046527//glucosyltransferase activity	-
Unigene24641_All	starch synthesis	Glucose-1-phosphate adenylyltransferase large subunit 1, chloroplast precursor, putative, expressed	768	48.7054	49.5481	0.024748				gi|1143500|emb|CAA88449.1|	484	1e-136	ADP-glucose pyrophosphorylase small subunit [Hordeum vulgare subsp. vulgare] >gi|229610843|emb|CAX51353.1| small subunit of ADP-glucose pyrophosphorylase [Hordeum vulgare subsp. vulgare]	sp|P30523|GLGS_WHEAT	459	1e-128	Glucose-1-phosphate adenylyltransferase small subunit, chloroplastic/amyloplastic OS=Triticum aestivum GN=AGP-S PE=2 SV=1	slr1176	295	4e-80	COG0448	ADP-glucose pyrophosphorylase	K00975	2e-113	405	zma:541902	glucose-1-phosphate adenylyltransferase [EC:2.7.7.27]	-	-	-
Unigene22705_All	starch synthesis	glycogen/starch synthases, ADP-glucose type family protein, expressed	247	4.2996	4.4157	0.0384397				gi|229610861|emb|CAX51362.1|	88.6	2e-17	soluble starch synthase [Hordeum vulgare subsp. vulgare]	--	--	--	--	--	--	--	--	--	--	--	--	--	--	GO:0005977//glycogen metabolic process	GO:0046527//glucosyltransferase activity	GO:0043231//intracellular membrane-bounded organelle
Unigene32377_All	starch synthesis	glycogen/starch synthases, ADP-glucose type family protein, expressed	307	4.6123	4.737	0.0384873				gi|229610857|emb|CAX51360.1|	205	1e-52	soluble starch synthase [Hordeum vulgare subsp. vulgare]	sp|Q43846|SSY3_SOLTU	145	1e-34	Soluble starch synthase 3, chloroplastic/amyloplastic OS=Solanum tuberosum GN=SS3 PE=1 SV=1	alr0031	70.9	6e-13	COG0297	Glycogen synthase	K00703	3e-24	107	olu:OSTLU_41853	starch synthase [EC:2.4.1.21]	-	-	-
Unigene178_All	starch synthesis	starch synthase III, putative, expressed	1003	5.0588	5.3163	0.0716273				gi|9502143|gb|AAF87999.1|AF258608_1	655	0	starch synthase III [Triticum aestivum]	sp|Q43846|SSY3_SOLTU	385	2e-106	Soluble starch synthase 3, chloroplastic/amyloplastic OS=Solanum tuberosum GN=SS3 PE=1 SV=1	--	--	--	--	--	K00703	1e-20	98.2	olu:OSTLU_41853	starch synthase [EC:2.4.1.21]	-	-	-
Unigene12700_All	starch synthesis	glucose-6-phosphate isomerase	2120	24.9357	26.2383	0.0734615				gi|91694275|gb|ABE41789.1|	1131	0	glucose-6-phosphate isomerase [Hordeum vulgare]	sp|P49105|G6PI_MAIZE	1062	0	Glucose-6-phosphate isomerase, cytosolic OS=Zea mays GN=PHI1 PE=2 SV=1	DR1742	501	2e-141	COG0166	Glucose-6-phosphate isomerase	K01810	0	1062	zma:542313	glucose-6-phosphate isomerase [EC:5.3.1.9]	-	-	-
Unigene3379_All	starch synthesis	glycogen/starch synthases, ADP-glucose type family protein, expressed	474	14.6877	16.1072	0.133097				gi|189096679|gb|ABY56824.3|	317	3e-86	starch synthase IIb precursor [Triticum aestivum]	sp|Q6Z2T8|SSY22_ORYSJ	268	1e-71	Soluble starch synthase 2-2, chloroplastic/amyloplastic OS=Oryza sativa subsp. japonica GN=SSII-2 PE=2 SV=2	BH1085	67.8	8e-12	COG0297	Glycogen synthase	K00703	2e-72	268	osa:4330709	starch synthase [EC:2.4.1.21]	-	-	-
Unigene1283_All	starch synthesis	Granule-bound starch synthase 1, chloroplast precursor, putative, expressed	1227	295.046	333.044	0.174771				gi|21667430|gb|AAM74049.1|AF486515_1	837	0	granule bound starch synthase I [Hordeum vulgare] >gi|21667436|gb|AAM74051.1|AF486518_1 granule bound starch synthase I [Hordeum vulgare]	sp|P09842|SSG1_HORVU	803	0	Granule-bound starch synthase 1, chloroplastic/amyloplastic OS=Hordeum vulgare GN=WAXY PE=1 SV=1	SP1124	166	8e-41	COG0297	Glycogen synthase	K13679	0	689	osa:4340018	granule-bound starch synthase [EC:2.4.1.242]	-	-	-
Unigene16336_All	starch synthesis	alpha-amylase/trypsin inhibitor precursor, putative, expressed	968	698.244	820.145	0.232148				gi|585289|sp|P28041.2|IAAA_HORVU	300	2e-80	RecName: Full=Alpha-amylase/trypsin inhibitor CMa; AltName: Full=Chloroform/methanol-soluble protein CMa; Flags: Precursor >gi|439275|emb|CAA49555.1| CMa, component of tetrameric alpha-amylase inhibitor [Hordeum vulgare subsp. vulgare]	sp|P28041|IAAA_HORVU	300	1e-80	Alpha-amylase/trypsin inhibitor CMa OS=Hordeum vulgare GN=IAT1 PE=1 SV=2	--	--	--	--	--	--	--	--	--	--	-	-	-
Unigene13381_All	starch synthesis	alpha-amylase/trypsin inhibitor precursor, putative	722	938.764	1262.4	0.427333				gi|585290|sp|P32936.2|IAAB_HORVU	315	3e-85	RecName: Full=Alpha-amylase/trypsin inhibitor CMb; AltName: Full=Chloroform/methanol-soluble protein CMb; Flags: Precursor >gi|452323|emb|CAA49556.1| CMb component of tetrameric alpha-amylase inhibitor [Hordeum vulgare subsp. vulgare]	sp|P32936|IAAB_HORVU	315	2e-85	Alpha-amylase/trypsin inhibitor CMb OS=Hordeum vulgare GN=IAT2 PE=1 SV=2	--	--	--	--	--	--	--	--	--	--	-	-	-
Unigene7516_All	starch synthesis	alpha-amylase/subtilisin inhibitor, putative, expressed	620	764.711	1105.54	0.531769				gi|18916|emb|CAA78305.1|	230	1e-59	bifunctional alpha-amylase/subtilisin inhibitor [Hordeum vulgare subsp. vulgare]	sp|P07596|IAAS_HORVU	200	5e-51	Alpha-amylase/subtilisin inhibitor OS=Hordeum vulgare PE=1 SV=2	--	--	--	--	--	--	--	--	--	--	-	GO:0004866//endopeptidase inhibitor activity	GO:0031410//cytoplasmic vesicle
Unigene1543_All	starch synthesis	alpha-amylase/trypsin inhibitor precursor, putative	928	503.277	728.301	0.533182				gi|585291|sp|P11643.2|IAAD_HORVU	358	7e-98	RecName: Full=Alpha-amylase/trypsin inhibitor CMd; AltName: Full=Chloroform/methanol-soluble protein CMd; Flags: Precursor >gi|452325|emb|CAA49557.1| CMd component of tetrameric alpha-amylase inhibitor [Hordeum vulgare subsp. vulgare] >gi|2264394|gb|AAB63441.1| CMd2 protein [Hordeum vulgare]	sp|P11643|IAAD_HORVU	358	4e-98	Alpha-amylase/trypsin inhibitor CMd OS=Hordeum vulgare GN=IAT3 PE=1 SV=2	--	--	--	--	--	--	--	--	--	--	-	-	-
Unigene16121_All	starch synthesis	alpha-amylase/subtilisin inhibitor, putative, expressed	490	276.696	415.006	0.584829				gi|18916|emb|CAA78305.1|	207	6e-53	bifunctional alpha-amylase/subtilisin inhibitor [Hordeum vulgare subsp. vulgare]	sp|P07596|IAAS_HORVU	207	3e-53	Alpha-amylase/subtilisin inhibitor OS=Hordeum vulgare PE=1 SV=2	--	--	--	--	--	--	--	--	--	--	-	-	-
Unigene18124_All	starch synthesis	alpha-amylase/trypsin inhibitor precursor, putative	758	44.9892	71.7853	0.67411				gi|82658796|gb|ABB88572.1|	300	1e-80	limit dextrinase inhibitor [Hordeum vulgare] >gi|82658798|gb|ABB88573.1| limit dextrinase inhibitor [Hordeum vulgare]	sp|P16969|IAA_HORVU	294	5e-79	Alpha-amylase/trypsin inhibitor OS=Hordeum vulgare PE=2 SV=1	--	--	--	--	--	--	--	--	--	--	-	-	-
Unigene6822_All	starch synthesis	glycogen/starch synthases, ADP-glucose type family protein, expressed	1174	9.247	16.6194	0.845811				gi|9502143|gb|AAF87999.1|AF258608_1	549	1e-155	starch synthase III [Triticum aestivum]	sp|Q43846|SSY3_SOLTU	451	5e-126	Soluble starch synthase 3, chloroplastic/amyloplastic OS=Solanum tuberosum GN=SS3 PE=1 SV=1	alr0031	207	4e-53	COG0297	Glycogen synthase	K00703	1e-87	321	olu:OSTLU_40458	starch synthase [EC:2.4.1.21]	-	-	-
Unigene12699_All	starch synthesis	glucose-7-phosphate isomerase	820	1.439	2.808	0.964476				gi|91694275|gb|ABE41789.1|	437	1e-122	glucose-6-phosphate isomerase [Hordeum vulgare]	sp|P49105|G6PI_MAIZE	407	4e-113	Glucose-6-phosphate isomerase, cytosolic OS=Zea mays GN=PHI1 PE=2 SV=1	DR1742	202	7e-52	COG0166	Glucose-6-phosphate isomerase	K01810	5e-114	407	zma:542313	glucose-6-phosphate isomerase [EC:5.3.1.9]	-	-	-
Unigene39415_All	starch synthesis	Glucose-1-phosphate adenylyltransferase large subunit 1, chloroplast precursor, putative, expressed	294	0.4014	1.6488	2.0383				gi|115467228|ref|NP_001057213.1|	114	3e-25	Os06g0229200 [Oryza sativa Japonica Group] >gi|113595253|dbj|BAF19127.1| Os06g0229200 [Oryza sativa Japonica Group]	sp|Q8L7F9|B3GTF_ARATH	82	1e-15	Beta-1,3-galactosyltransferase 15 OS=Arabidopsis thaliana GN=B3GALT15 PE=2 SV=1	all4645	52.4	2e-07	COG0448	ADP-glucose pyrophosphorylase	--	--	--	--	--	GO:0033692;GO:0006464//protein modification process	GO:0035250//UDP-galactosyltransferase activity;GO:0004721//phosphoprotein phosphatase activity;GO:0030246//carbohydrate binding	GO:0031224//intrinsic to membrane;GO:0043231//intracellular membrane-bounded organelle;GO:0031410//cytoplasmic vesicle
Unigene34769_All	starch synthesis	glycogen/starch synthases, ADP-glucose type family protein, expressed	884	0.5339	0	-9.0604				gi|189096679|gb|ABY56824.3|	280	2e-74	starch synthase IIb precursor [Triticum aestivum]	sp|Q6Z2T8|SSY22_ORYSJ	257	7e-68	Soluble starch synthase 2-2, chloroplastic/amyloplastic OS=Oryza sativa subsp. japonica GN=SSII-2 PE=2 SV=2	TM0895	120	4e-27	COG0297	Glycogen synthase	K00703	9e-69	257	osa:4330709	starch synthase [EC:2.4.1.21]	-	-	-
Unigene30132_All	starch synthesis + starch degradation	isoamylase, putative, expressed or 1,4-alpha-glucan branching enzyme	240	3.4416	0.5049	-2.76901				gi|16923279|dbj|BAB72000.1|	167	3e-41	isoamylase [Hordeum vulgare subsp. vulgare]	sp|O04196|ISOA1_ARATH	98.6	1e-20	Isoamylase 1, chloroplastic OS=Arabidopsis thaliana GN=ISA1 PE=1 SV=1	RSp0238	60.5	7e-10	COG1523	Type II secretory pathway, pullulanase PulA and related glycosidases	K02438	2e-36	147	osa:4346068	glycogen operon protein GlgX [EC:3.2.1.-]	GO:0044238//primary metabolic process	GO:0043167//ion binding;GO:0004133//glycogen debranching enzyme activity;GO:0016160//amylase activity	GO:0043231//intracellular membrane-bounded organelle
Unigene28004_All	starch synthesis + starch degradation	beta-amylase, putative, expressed or beta-amylase	211	3.3554	0.5743	-2.54661				gi|229610895|emb|CAX51379.1|	154	3e-37	beta-amylase [Hordeum vulgare subsp. vulgare]	sp|Q9LIR6|BAM1_ARATH	125	1e-28	Beta-amylase 1, chloroplastic OS=Arabidopsis thaliana GN=BAM1 PE=1 SV=1	--	--	--	--	--	K01177	6e-26	112	ath:AT4G17090	beta-amylase [EC:3.2.1.2]	GO:0005982//starch metabolic process;GO:0009933//meristem structural organization;GO:0007167//enzyme linked receptor protein signaling pathway;GO:0010073//meristem maintenance;GO:0003006//reproductive developmental process;GO:0006950//response to stress;GO:0006464//protein modification process	GO:0016772//transferase activity, transferring phosphorus-containing groups;GO:0016160//amylase activity;GO:0043167//ion binding;GO:0032559//adenyl ribonucleotide binding	GO:0043231//intracellular membrane-bounded organelle;GO:0044444//cytoplasmic part;GO:0016020//membrane
Unigene33900_All	starch synthesis + starch degradation	alpha-amylase isozyme C, putative, expressed or alpha-amylase activity	375	3.776	0.6463	-2.54658				gi|229610887|emb|CAX51375.1|	271	2e-72	alpha-amylase [Hordeum vulgare subsp. vulgare]	sp|P00693|AMY1_HORVU	176	3e-44	Alpha-amylase type A isozyme OS=Hordeum vulgare GN=AMY1.1 PE=1 SV=1	--	--	--	--	--	--	--	--	--	--	GO:0044238//primary metabolic process	GO:0046872//metal ion binding;GO:0016160//amylase activity	-
Unigene36900_All	starch synthesis + starch degradation	isoamylase, putative, expressed or 1,4-alpha-glucan branching enzyme	259	5.0116	0.9358	-2.421				gi|58865274|dbj|BAD89532.1|	180	5e-45	isoamylase [Hordeum vulgare]	sp|Q9M0S5|ISOA3_ARATH	156	3e-38	Isoamylase 3, chloroplastic OS=Arabidopsis thaliana GN=ISA3 PE=1 SV=2	MA2000	104	4e-23	COG1523	Type II secretory pathway, pullulanase PulA and related glycosidases	K02438	9e-40	158	zma:542095	glycogen operon protein GlgX [EC:3.2.1.-]	GO:0005982//starch metabolic process	GO:0016798//hydrolase activity, acting on glycosyl bonds;GO:0043167//ion binding;GO:0004133//glycogen debranching enzyme activity	GO:0009532//plastid stroma;GO:0043036
Unigene15110_All	starch synthesis + starch degradation	phosphoglucomutase	535	6.1757	1.5856	-1.96157				gi|115468080|ref|NP_001057639.1|	328	2e-89	Os06g0476200 [Oryza sativa Japonica Group] >gi|113595679|dbj|BAF19553.1| Os06g0476200 [Oryza sativa Japonica Group]	sp|Q88BD4|ALGC_PSESM	99	2e-20	Phosphomannomutase/phosphoglucomutase OS=Pseudomonas syringae pv. tomato GN=algC PE=3 SV=1	lin1985	178	4e-45	COG1109	Phosphomannomutase	K01840	1e-90	328	osa:4341038	phosphomannomutase [EC:5.4.2.8]	GO:0044238//primary metabolic process	GO:0016868//intramolecular transferase activity, phosphotransferases	GO:0009536//plastid
Unigene32979_All	starch synthesis + starch degradation	phosphoglucomutase	233	2.0257	0.5201	-1.96156				gi|115471885|ref|NP_001059541.1|	128	2e-29	Os07g0447800 [Oryza sativa Japonica Group] >gi|113611077|dbj|BAF21455.1| Os07g0447800 [Oryza sativa Japonica Group]	--	--	--	--	lin1985	60.1	1e-09	COG1109	Phosphomannomutase	K01840	4e-11	63.5	cme:CMC121C	phosphomannomutase [EC:5.4.2.8]	GO:0044238//primary metabolic process	GO:0016868//intramolecular transferase activity, phosphotransferases	GO:0009536//plastid
Unigene34057_All	starch synthesis + starch degradation	isoamylase, putative, expressed or 1,4-alpha-glucan branching enzyme	223	4.7623	2.1738	-1.13144				gi|229610873|emb|CAX51368.1|	156	8e-38	isoamylase [Hordeum vulgare subsp. vulgare]	sp|O04196|ISOA1_ARATH	101	1e-21	Isoamylase 1, chloroplastic OS=Arabidopsis thaliana GN=ISA1 PE=1 SV=1	slr1857	67.4	6e-12	COG1523	Type II secretory pathway, pullulanase PulA and related glycosidases	K02438	1e-34	141	osa:4346068	glycogen operon protein GlgX [EC:3.2.1.-]	GO:0044238//primary metabolic process	GO:0043167//ion binding;GO:0004133//glycogen debranching enzyme activity;GO:0016160//amylase activity	GO:0043231//intracellular membrane-bounded organelle
Unigene796_All	starch synthesis + starch degradation	alpha-amylase isozyme C, putative, expressed or alpha-amylase activity	890	7.4247	3.5403	-1.06846				gi|229610881|emb|CAX51372.1|	468	1e-131	alpha-amylase [Hordeum vulgare subsp. vulgare]	sp|P00693|AMY1_HORVU	468	3e-131	Alpha-amylase type A isozyme OS=Hordeum vulgare GN=AMY1.1 PE=1 SV=1	AGl1863	70.1	5e-12	COG0366	Glycosidases	K01176	1e-109	393	osa:4342055	alpha-amylase [EC:3.2.1.1]	-	-	-
Unigene11077_All	starch synthesis + starch degradation	isoamylase, putative, expressed or 1,4-alpha-glucan branching enzyme	584	5.8596	2.9052	-1.01216				gi|229610877|emb|CAX51370.1|	365	1e-100	isoamylase [Hordeum vulgare subsp. vulgare]	sp|Q9M0S5|ISOA3_ARATH	245	1e-64	Isoamylase 3, chloroplastic OS=Arabidopsis thaliana GN=ISA3 PE=1 SV=2	slr1857	94.4	1e-19	COG1523	Type II secretory pathway, pullulanase PulA and related glycosidases	K02438	2e-91	331	osa:4347328	glycogen operon protein GlgX [EC:3.2.1.-]	-	-	-
Unigene19323_All	starch synthesis + starch degradation	beta-amylase, putative, expressed or beta-amylase	233	6.0772	3.1207	-0.961537				gi|4138596|emb|CAA76131.1|	170	4e-42	beta-amylase [Triticum aestivum]	sp|P25853|BAM5_ARATH	142	7e-34	Beta-amylase 5 OS=Arabidopsis thaliana GN=BAM5 PE=2 SV=1	--	--	--	--	--	K01177	7e-24	105	osa:4349417	beta-amylase [EC:3.2.1.2]	-	-	-
Unigene7490_All	starch synthesis + starch degradation	phosphoglucomutase	467	159.691	83.8193	-0.929925				gi|18076790|emb|CAC85913.1|	109	1e-23	phosphoglucomutase [Triticum aestivum]	sp|Q9SNX2|PGMC_BROIN	108	1e-23	Phosphoglucomutase, cytoplasmic OS=Bromus inermis GN=PGM1 PE=2 SV=1	SPBC32F12.10	63.9	1e-10	COG0033	Phosphoglucomutase	K01835	3e-22	101	osa:4333895	phosphoglucomutase [EC:5.4.2.2]	GO:0010038//response to metal ion;GO:0019318//hexose metabolic process	GO:0046872//metal ion binding;GO:0016868//intramolecular transferase activity, phosphotransferases	GO:0016020//membrane;GO:0009536//plastid
Unigene3902_All	starch synthesis + starch degradation	1,4-alpha-glucan branching enzyme IIB, chloroplast precursor, putative, expressed 1,4-alpha-glucan branching enzyme	1830	9.2207	5.2316	-0.817624				gi|229610871|emb|CAX51367.1|	1197	0	starch branching enzyme [Hordeum vulgare subsp. vulgare]	sp|Q08047|GLGB_MAIZE	1133	0	1,4-alpha-glucan-branching enzyme 2, chloroplastic/amyloplastic OS=Zea mays GN=SBE1 PE=1 SV=1	YEL011w	641	0	COG0296	1,4-alpha-glucan branching enzyme	K00700	0	1145	sbi:SORBI_06g015360	1,4-alpha-glucan branching enzyme [EC:2.4.1.18]	-	-	-
Unigene383_All	starch synthesis + starch degradation	isoamylase, putative, expressed or 1,4-alpha-glucan branching enzyme	1416	14.2499	8.9864	-0.665137				gi|21314275|gb|AAM46866.1|AF490375_1	798	0	isoamylase [Hordeum vulgare subsp. vulgare]	sp|O04196|ISOA1_ARATH	620	1e-176	Isoamylase 1, chloroplastic OS=Arabidopsis thaliana GN=ISA1 PE=1 SV=1	slr1857	296	8e-80	COG1523	Type II secretory pathway, pullulanase PulA and related glycosidases	K02438	0	708	osa:4346068	glycogen operon protein GlgX [EC:3.2.1.-]	-	-	-
Unigene17761_All	starch synthesis + starch degradation	alpha-amylase isozyme C, putative, expressed or alpha-amylase activity	627	4.1403	2.7059	-0.613627				gi|4699831|pdb|1AVA|A	417	1e-116	Chain A, Amy2BASI PROTEIN-Protein Complex From Barley Seed >gi|4699832|pdb|1AVA|B Chain B, Amy2BASI PROTEIN-Protein Complex From Barley Seed >gi|157829976|pdb|1AMY|A Chain A, Crystal And Molecular Structure Of Barley Alpha-Amylase >gi|157830292|pdb|1BG9|A Chain A, Barley Alpha-Amylase With Substrate Analogue Acarbose	sp|P04063|AMY2_HORVU	417	3e-116	Alpha-amylase type B isozyme OS=Hordeum vulgare GN=AMY1.2 PE=1 SV=3	--	--	--	--	--	K01176	2e-95	345	osa:4330832	alpha-amylase [EC:3.2.1.1]	GO:0005985//sucrose metabolic process;GO:0005982//starch metabolic process	GO:0016160//amylase activity;GO:0046872//metal ion binding	GO:0031410//cytoplasmic vesicle
Unigene37489_All	starch synthesis + starch degradation	1,4-alpha-glucan branching enzyme IIB, chloroplast precursor, putative, expressed 1,4-alpha-glucan branching enzyme	966	2.0766	1.38	-0.589555				gi|229610869|emb|CAX51366.1|	659	0	starch branching enzyme [Hordeum vulgare subsp. vulgare]	sp|Q08047|GLGB_MAIZE	451	3e-126	1,4-alpha-glucan-branching enzyme 2, chloroplastic/amyloplastic OS=Zea mays GN=SBE1 PE=1 SV=1	YEL011w	204	2e-52	COG0296	1,4-alpha-glucan branching enzyme	K00700	6e-146	514	sbi:SORBI_06g015360	1,4-alpha-glucan branching enzyme [EC:2.4.1.18]	GO:0044238//primary metabolic process	GO:0016798//hydrolase activity, acting on glycosyl bonds;GO:0043167//ion binding;GO:0035251//UDP-glucosyltransferase activity	GO:0043231//intracellular membrane-bounded organelle
Unigene11205_All	starch synthesis + starch degradation	phosphoglucomutase	636	394.444	281.247	-0.487984				gi|12585326|sp|Q9SNX2.1|PGMC_BROIN	164	8e-40	RecName: Full=Phosphoglucomutase, cytoplasmic; Short=PGM; AltName: Full=Glucose phosphomutase	sp|Q9SNX2|PGMC_BROIN	164	4e-40	Phosphoglucomutase, cytoplasmic OS=Bromus inermis GN=PGM1 PE=2 SV=1	AGl1564	102	5e-22	COG0033	Phosphoglucomutase	K01835	1e-40	163	osa:4333895	phosphoglucomutase [EC:5.4.2.2]	-	-	-
Unigene17364_All	starch synthesis + starch degradation	1,4-alpha-glucan branching enzyme IIB, chloroplast precursor, putative, expressed 1,4-alpha-glucan branching enzyme	1463	14.76	10.7686	-0.454862				gi|229610869|emb|CAX51366.1|	783	0	starch branching enzyme [Hordeum vulgare subsp. vulgare]	sp|Q08047|GLGB_MAIZE	695	0	1,4-alpha-glucan-branching enzyme 2, chloroplastic/amyloplastic OS=Zea mays GN=SBE1 PE=1 SV=1	YEL011w	397	3e-110	COG0296	1,4-alpha-glucan branching enzyme	K00700	0	717	sbi:SORBI_06g015360	1,4-alpha-glucan branching enzyme [EC:2.4.1.18]	GO:0005982//starch metabolic process	GO:0016798//hydrolase activity, acting on glycosyl bonds;GO:0035251//UDP-glucosyltransferase activity;GO:0043167//ion binding	GO:0009536//plastid
Unigene16435_All	starch synthesis + starch degradation	1,4-alpha-glucan branching enzyme IIB, chloroplast precursor, putative, expressed 1,4-alpha-glucan branching enzyme	440	6.7045	4.9577	-0.435459				gi|3851528|gb|AAC72336.1|	302	9e-82	starch branching enzyme IIb [Hordeum vulgare subsp. vulgare]	sp|Q08047|GLGB_MAIZE	135	1e-31	1,4-alpha-glucan-branching enzyme 2, chloroplastic/amyloplastic OS=Zea mays GN=SBE1 PE=1 SV=1	--	--	--	--	--	K00700	3e-36	147	osa:4329532	1,4-alpha-glucan branching enzyme [EC:2.4.1.18]	-	-	-
Unigene45045_All	starch synthesis + starch degradation	1,4-alpha-glucan branching enzyme IIB, chloroplast precursor, putative, expressed 1,4-alpha-glucan branching enzyme	771	10.8663	8.8022	-0.303925				gi|229610871|emb|CAX51367.1|	451	1e-126	starch branching enzyme [Hordeum vulgare subsp. vulgare]	sp|Q08047|GLGB_MAIZE	398	3e-110	1,4-alpha-glucan-branching enzyme 2, chloroplastic/amyloplastic OS=Zea mays GN=SBE1 PE=1 SV=1	YEL011w	204	2e-52	COG0296	1,4-alpha-glucan branching enzyme	K00700	1e-112	403	osa:4329532	1,4-alpha-glucan branching enzyme [EC:2.4.1.18]	-	-	-
Unigene370_All	starch synthesis + starch degradation	beta-amylase, putative, expressed or beta-amylase	1404	16.1366	14.5011	-0.154174				gi|297719773|ref|NP_001172248.1|	762	0	Os01g0236800 [Oryza sativa Japonica Group] >gi|255673039|dbj|BAH90978.1| Os01g0236800 [Oryza sativa Japonica Group]	sp|O23553|BAM3_ARATH	426	2e-118	Beta-amylase 3, chloroplastic OS=Arabidopsis thaliana GN=BAM3 PE=1 SV=3	--	--	--	--	--	K01177	3e-119	426	ath:AT4G17090	beta-amylase [EC:3.2.1.2]	-	-	-
Unigene13652_All	starch synthesis + starch degradation	alpha-amylase isozyme C2 precursor, putative, expressed + alpha-amylase activity	764	5.5602	5.0759	-0.131473				gi|297597499|ref|NP_001044062.2|	261	5e-69	Os01g0715400 [Oryza sativa Japonica Group] >gi|255673624|dbj|BAF05976.2| Os01g0715400 [Oryza sativa Japonica Group]	sp|P04063|AMY2_HORVU	147	6e-35	Alpha-amylase type B isozyme OS=Hordeum vulgare GN=AMY1.2 PE=1 SV=3	--	--	--	--	--	--	--	--	--	--	-	-	-
Unigene43965_All	starch synthesis + starch degradation	isoamylase, putative, expressed or 1,4-alpha-glucan branching enzyme	252	4.6825	4.809	0.0384579				gi|229610873|emb|CAX51368.1|	190	5e-48	isoamylase [Hordeum vulgare subsp. vulgare]	sp|O04196|ISOA1_ARATH	119	4e-27	Isoamylase 1, chloroplastic OS=Arabidopsis thaliana GN=ISA1 PE=1 SV=1	slr0237	60.1	1e-09	COG1523	Type II secretory pathway, pullulanase PulA and related glycosidases	K02438	1e-42	168	osa:4346068	glycogen operon protein GlgX [EC:3.2.1.-]	GO:0044238//primary metabolic process	GO:0043167//ion binding;GO:0004133//glycogen debranching enzyme activity;GO:0016160//amylase activity	GO:0043231//intracellular membrane-bounded organelle
Unigene3119_All	starch synthesis + starch degradation	beta-amylase, putative, expressed or beta-amylase	656	10.4329	10.7148	0.0384647				gi|229610899|emb|CAX51381.1|	463	1e-130	beta-amylase [Hordeum vulgare subsp. vulgare]	sp|O80831|BAM7_ARATH	371	2e-102	Beta-amylase 7 OS=Arabidopsis thaliana GN=BAM7 PE=2 SV=2	--	--	--	--	--	K01177	6e-68	254	ath:AT4G17090	beta-amylase [EC:3.2.1.2]	-	-	-
Unigene17440_All	starch synthesis + starch degradation	1,4-alpha-glucan branching enzyme IIB, chloroplast precursor, putative, expressed 1,4-alpha-glucan branching enzyme	857	22.0302	38.7461	0.814569				gi|229610867|emb|CAX51365.1|	379	1e-104	starch branching enzyme [Hordeum vulgare subsp. vulgare]	sp|Q01401|GLGB_ORYSJ	270	7e-72	1,4-alpha-glucan-branching enzyme, chloroplastic/amyloplastic OS=Oryza sativa subsp. japonica GN=SBE1 PE=1 SV=2	YEL011w	83.6	4e-16	COG0296	1,4-alpha-glucan branching enzyme	K00700	1e-72	270	osa:4342117	1,4-alpha-glucan branching enzyme [EC:2.4.1.18]	GO:0005982//starch metabolic process	GO:0016798//hydrolase activity, acting on glycosyl bonds;GO:0035251//UDP-glucosyltransferase activity;GO:0043167//ion binding	GO:0009536//plastid
Unigene17379_All	starch synthesis + starch degradation	1,4-alpha-glucan branching enzyme IIB, chloroplast precursor, putative, expressed 1,4-alpha-glucan branching enzyme	1509	11.104	20.3184	0.871707				gi|32186932|gb|AAP72268.1|	1056	0	starch branching enzyme I [Hordeum vulgare]	sp|Q01401|GLGB_ORYSJ	977	0	1,4-alpha-glucan-branching enzyme, chloroplastic/amyloplastic OS=Oryza sativa subsp. japonica GN=SBE1 PE=1 SV=2	YEL011w	547	2e-155	COG0296	1,4-alpha-glucan branching enzyme	K00700	0	977	sbi:SORBI_10g030776	1,4-alpha-glucan branching enzyme [EC:2.4.1.18]	GO:0005982//starch metabolic process	GO:0016798//hydrolase activity, acting on glycosyl bonds;GO:0035251//UDP-glucosyltransferase activity;GO:0043167//ion binding	GO:0009536//plastid
Unigene39062_All	starch synthesis + starch degradation	1,4-alpha-glucan branching enzyme IIB, chloroplast precursor, putative, expressed 1,4-alpha-glucan branching enzyme	910	0.2593	0.5327	1.0387				gi|229610869|emb|CAX51366.1|	597	1e-170	starch branching enzyme [Hordeum vulgare subsp. vulgare]	sp|Q08047|GLGB_MAIZE	380	7e-105	1,4-alpha-glucan-branching enzyme 2, chloroplastic/amyloplastic OS=Zea mays GN=SBE1 PE=1 SV=1	YEL011w	144	3e-34	COG0296	1,4-alpha-glucan branching enzyme	K00700	8e-126	447	sbi:SORBI_06g015360	1,4-alpha-glucan branching enzyme [EC:2.4.1.18]	-	-	-
Unigene36626_All	starch synthesis + starch degradation	1,4-alpha-glucan branching enzyme IIB, chloroplast precursor, putative, expressed 1,4-alpha-glucan branching enzyme	452	0.7832	2.1449	1.45346				gi|229610871|emb|CAX51367.1|	247	3e-65	starch branching enzyme [Hordeum vulgare subsp. vulgare]	sp|Q08047|GLGB_MAIZE	211	2e-54	1,4-alpha-glucan-branching enzyme 2, chloroplastic/amyloplastic OS=Zea mays GN=SBE1 PE=1 SV=1	YEL011w	107	6e-24	COG0296	1,4-alpha-glucan branching enzyme	K00700	3e-59	224	osa:4329532	1,4-alpha-glucan branching enzyme [EC:2.4.1.18]	GO:0005982//starch metabolic process	GO:0016798//hydrolase activity, acting on glycosyl bonds;GO:0043167//ion binding;GO:0016758//transferase activity, transferring hexosyl groups	GO:0009536//plastid
Unigene2436_All	starch synthesis + starch degradation	beta-amylase, putative, expressed or beta-amylase	455	2.5934	7.724	1.5745				gi|4138596|emb|CAA76131.1|	279	7e-75	beta-amylase [Triticum aestivum]	sp|O64407|AMYB_VIGUN	171	2e-42	Beta-amylase OS=Vigna unguiculata GN=BMY1 PE=2 SV=1	DR0479	52	4e-07	COG0744	Membrane carboxypeptidase (penicillin-binding protein)	K01177	2e-19	92	osa:4349417	beta-amylase [EC:3.2.1.2]	GO:0005976//polysaccharide metabolic process	GO:0043167//ion binding;GO:0016160//amylase activity	GO:0043231//intracellular membrane-bounded organelle
Unigene35800_All	starch synthesis + starch degradation	1,4-alpha-glucan branching enzyme IIB, chloroplast precursor, putative, expressed 1,4-alpha-glucan branching enzyme	576	0.4097	0	-8.6784				gi|229610869|emb|CAX51366.1|	352	2e-96	starch branching enzyme [Hordeum vulgare subsp. vulgare]	sp|Q08047|GLGB_MAIZE	285	1e-76	1,4-alpha-glucan-branching enzyme 2, chloroplastic/amyloplastic OS=Zea mays GN=SBE1 PE=1 SV=1	YEL011w	149	2e-36	COG0296	1,4-alpha-glucan branching enzyme	K00700	5e-83	303	sbi:SORBI_06g015360	1,4-alpha-glucan branching enzyme [EC:2.4.1.18]	GO:0044238//primary metabolic process	GO:0016798//hydrolase activity, acting on glycosyl bonds;GO:0043167//ion binding;GO:0035251//UDP-glucosyltransferase activity	GO:0043231//intracellular membrane-bounded organelle
Unigene39468_All	starch synthesis + starch degradation	1,4-alpha-glucan branching enzyme IIB, chloroplast precursor, putative, expressed 1,4-alpha-glucan branching enzyme	248	0	1.9546	10.9327				gi|2228781|gb|AAB61925.1|	158	2e-38	starch branching enzyme I [Triticum aestivum]	sp|Q01401|GLGB_ORYSJ	122	5e-28	1,4-alpha-glucan-branching enzyme, chloroplastic/amyloplastic OS=Oryza sativa subsp. japonica GN=SBE1 PE=1 SV=2	YEL011w	79.7	1e-15	COG0296	1,4-alpha-glucan branching enzyme	K00700	6e-29	122	osa:4342117	1,4-alpha-glucan branching enzyme [EC:2.4.1.18]	GO:0005982//starch metabolic process	GO:0016798//hydrolase activity, acting on glycosyl bonds;GO:0035251//UDP-glucosyltransferase activity;GO:0043167//ion binding	GO:0009536//plastid
Unigene406_All	starch synthesis or starch degradation	phosphoglucomutase	1324	179.673	99.9523	-0.846059				gi|18076790|emb|CAC85913.1|	862	0	phosphoglucomutase [Triticum aestivum]	sp|Q9SNX2|PGMC_BROIN	848	0	Phosphoglucomutase, cytoplasmic OS=Bromus inermis GN=PGM1 PE=2 SV=1	SPBC32F12.10	424	2e-118	COG0033	Phosphoglucomutase	K01835	0	823	osa:4333895	phosphoglucomutase [EC:5.4.2.2]	-	-	-
Unigene37453_All	threonine biosynthesis from homoserine	threonine synthase	238	10.4117	3.0552	-1.76887				gi|226504054|ref|NP_001149770.1|	156	8e-38	threonine synthase [Zea mays] >gi|195633095|gb|ACG36731.1| threonine synthase [Zea mays]	sp|Q9S7B5|THRC1_ARATH	97.8	2e-20	Threonine synthase 1, chloroplastic OS=Arabidopsis thaliana GN=TS1 PE=1 SV=1	--	--	--	--	--	K01733	5e-39	156	zma:100283397	threonine synthase [EC:4.2.3.1]	GO:0006566//threonine metabolic process	GO:0016838//carbon-oxygen lyase activity, acting on phosphates;GO:0048037//cofactor binding	GO:0009536//plastid
Unigene12527_All	threonine biosynthesis from homoserine	threonine synthase	764	60.853	39.6556	-0.617804				gi|115465273|ref|NP_001056236.1|	277	9e-74	Os05g0549700 [Oryza sativa Japonica Group] >gi|113579787|dbj|BAF18150.1| Os05g0549700 [Oryza sativa Japonica Group]	sp|Q9S7B5|THRC1_ARATH	221	4e-57	Threonine synthase 1, chloroplastic OS=Arabidopsis thaliana GN=TS1 PE=1 SV=1	MK0974	73.2	4e-13	COG0498	Threonine synthase	K01733	2e-75	279	sbi:SORBI_09g027430	threonine synthase [EC:4.2.3.1]	-	-	-
Unigene17028_All	threonine biosynthesis from homoserine	threonine synthase	1030	44.7939	31.0617	-0.528165				gi|115465273|ref|NP_001056236.1|	652	0	Os05g0549700 [Oryza sativa Japonica Group] >gi|113579787|dbj|BAF18150.1| Os05g0549700 [Oryza sativa Japonica Group]	sp|Q9MT28|THRC_SOLTU	542	2e-153	Threonine synthase, chloroplastic OS=Solanum tuberosum PE=2 SV=1	MJ1465	196	7e-50	COG0498	Threonine synthase	K01733	0	652	osa:4339521	threonine synthase [EC:4.2.3.1]	-	-	-
Unigene25358_All	threonine biosynthesis from homoserine	threonine synthase	296	15.1486	14.739	-0.0395458				gi|115439335|ref|NP_001043947.1|	194	3e-49	Os01g0693800 [Oryza sativa Japonica Group] >gi|113533478|dbj|BAF05861.1| Os01g0693800 [Oryza sativa Japonica Group]	sp|Q9S7B5|THRC1_ARATH	156	3e-38	Threonine synthase 1, chloroplastic OS=Arabidopsis thaliana GN=TS1 PE=1 SV=1	MA1610	72.4	2e-13	COG0498	Threonine synthase	K01733	4e-51	196	sbi:SORBI_03g031880	threonine synthase [EC:4.2.3.1]	GO:0006566//threonine metabolic process	GO:0016838//carbon-oxygen lyase activity, acting on phosphates;GO:0048037//cofactor binding	GO:0009536//plastid
Unigene34390_All	threonine degradation I +threonine biosynthesis from homoserine+ isoleucine biosynthesis I+ methionine degradation I	tryptophan synthase or threonine synthase or tryptophan synthase or cystathionine beta-synthase	320	2.5812	1.5148	-0.768915				gi|297601569|ref|NP_001051069.2|	198	2e-50	Os03g0713000 [Oryza sativa Japonica Group] >gi|255674834|dbj|BAF12983.2| Os03g0713000 [Oryza sativa Japonica Group]	sp|Q9ZSS6|THD1_ARATH	178	8e-45	Threonine dehydratase biosynthetic, chloroplastic OS=Arabidopsis thaliana GN=OMR1 PE=1 SV=1	alr4232	147	5e-36	COG1171	Threonine dehydratase	K01754	2e-53	204	sbi:SORBI_01g010250	threonine dehydratase [EC:4.3.1.19]	-	-	-
Unigene6264_All	threonine degradation I +threonine biosynthesis from homoserine+ isoleucine biosynthesis I+ methionine degradation I	tryptophan synthase or threonine synthase or tryptophan synthase or cystathionine beta-synthase	508	5.3425	4.7712	-0.163163				gi|149391205|gb|ABR25620.1|	251	4e-66	threonine dehydratase biosynthetic [Oryza sativa Indica Group]	sp|Q9ZSS6|THD1_ARATH	211	1e-54	Threonine dehydratase biosynthetic, chloroplastic OS=Arabidopsis thaliana GN=OMR1 PE=1 SV=1	alr4232	137	1e-32	COG1171	Threonine dehydratase	K01754	1e-75	279	sbi:SORBI_01g010250	threonine dehydratase [EC:4.3.1.19]	GO:0006549//isoleucine metabolic process;GO:0006351//transcription, DNA-dependent;GO:0009066//aspartate family amino acid metabolic process	GO:0016841//ammonia-lyase activity;GO:0001071;GO:0048037//cofactor binding	GO:0009536//plastid
Unigene14741_All	threonine degradation I +threonine biosynthesis from homoserine+ isoleucine biosynthesis I+ methionine degradation I	tryptophan synthase or threonine synthase or tryptophan synthase or cystathionine beta-synthase	335	2.8179	2.894	0.0384445				gi|116733975|gb|ABK20067.1|	196	7e-50	chloroplast threonine deaminase 1 precursor [Solanum lycopersicum]	sp|Q9ZSS6|THD1_ARATH	187	2e-47	Threonine dehydratase biosynthetic, chloroplastic OS=Arabidopsis thaliana GN=OMR1 PE=1 SV=1	NMA1096	138	3e-33	COG1171	Threonine dehydratase	K01754	4e-54	206	sbi:SORBI_01g010250	threonine dehydratase [EC:4.3.1.19]	-	-	-
Unigene9845_All	threonine degradation I +threonine biosynthesis from homoserine+ isoleucine biosynthesis I+ methionine degradation I	tryptophan synthase or threonine synthase or tryptophan synthase or cystathionine beta-synthase	791	4.7737	5.5155	0.208384				gi|148356707|dbj|BAF63026.1|	406	1e-112	serine racemase [Hordeum vulgare subsp. vulgare]	sp|Q54HH2|SRR_DICDI	202	2e-51	Probable serine racemase OS=Dictyostelium discoideum GN=srr PE=3 SV=1	RSp1516	181	1e-45	COG1171	Threonine dehydratase	K01754	6e-98	354	zma:100216615	threonine dehydratase [EC:4.3.1.19]	GO:0006520//cellular amino acid metabolic process	GO:0016841//ammonia-lyase activity;GO:0047661;GO:0048037//cofactor binding	-
Unigene26345_All	threonine degradation III	hydroxyacylglutathione hydrolase	233	3.0386	1.5604	-0.961491				gi|28143946|gb|AAO26580.1|	158	2e-38	glyoxalase II [Brassica juncea]	sp|Q8LDW8|GLO2D_ARATH	140	3e-33	Probable hydroxyacylglutathione hydrolase 2, chloroplast OS=Arabidopsis thaliana GN=GLX2-4 PE=2 SV=1	sll1019	74.3	5e-14	COG0491	Zn-dependent hydrolases, including glyoxylases	K01069	1e-12	68.9	rcu:RCOM_0690340	hydroxyacylglutathione hydrolase [EC:3.1.2.6]	GO:0006089//lactate metabolic process	GO:0046914//transition metal ion binding;GO:0016790//thiolester hydrolase activity	GO:0009536//plastid
Unigene15249_All	threonine degradation III	lactoylglutathione lyase	1285	3.3058	2.2634	-0.546508				gi|115475151|ref|NP_001061172.1|	553	1e-156	Os08g0191700 [Oryza sativa Japonica Group] >gi|84029333|sp|Q948T6.2|LGUL_ORYSJ RecName: Full=Lactoylglutathione lyase; AltName: Full=Aldoketomutase; AltName: Full=Allergen Glb33; AltName: Full=Glyoxalase I; Short=Glx I; AltName: Full=Ketone-aldehyde mutase; AltName: Full=Methylglyoxalase; AltName: Full=PP33; AltName: Full=S-D-lactoylglutathione methylglyoxal lyase; AltName: Allergen=Ory s ? >gi|4…	sp|Q948T6|LGUL_ORYSJ	553	1e-156	Lactoylglutathione lyase OS=Oryza sativa subsp. japonica GN=GLX-I PE=1 SV=2	RSc0520	144	3e-34	COG0346	Lactoylglutathione lyase and related lyases	--	--	--	--	--	-	-	-
Unigene18976_All	threonine degradation III	lactoylglutathione lyase	1225	11.0775	8.4089	-0.397643				gi|115475151|ref|NP_001061172.1|	553	1e-156	Os08g0191700 [Oryza sativa Japonica Group] >gi|84029333|sp|Q948T6.2|LGUL_ORYSJ RecName: Full=Lactoylglutathione lyase; AltName: Full=Aldoketomutase; AltName: Full=Allergen Glb33; AltName: Full=Glyoxalase I; Short=Glx I; AltName: Full=Ketone-aldehyde mutase; AltName: Full=Methylglyoxalase; AltName: Full=PP33; AltName: Full=S-D-lactoylglutathione methylglyoxal lyase; AltName: Allergen=Ory s ? >gi|4…	sp|Q948T6|LGUL_ORYSJ	553	9e-157	Lactoylglutathione lyase OS=Oryza sativa subsp. japonica GN=GLX-I PE=1 SV=2	RSc0520	144	2e-34	COG0346	Lactoylglutathione lyase and related lyases	--	--	--	--	--	-	-	-
Unigene25201_All	threonine degradation III	hydroxyacylglutathione hydrolase	701	12.1198	9.5083	-0.350107				gi|28143946|gb|AAO26580.1|	168	5e-41	glyoxalase II [Brassica juncea]	sp|Q8LDW8|GLO2D_ARATH	126	2e-28	Probable hydroxyacylglutathione hydrolase 2, chloroplast OS=Arabidopsis thaliana GN=GLX2-4 PE=2 SV=1	AGl2423	83.6	3e-16	COG0491	Zn-dependent hydrolases, including glyoxylases	K01069	3e-14	75.9	rcu:RCOM_0690340	hydroxyacylglutathione hydrolase [EC:3.1.2.6]	GO:0006089//lactate metabolic process	GO:0046914//transition metal ion binding;GO:0016790//thiolester hydrolase activity	GO:0009536//plastid
Unigene5629_All	threonine degradation III	lactoylglutathione lyase	747	93.0409	79.9806	-0.218215				gi|226500150|ref|NP_001148888.1|	236	2e-61	lactoylglutathione lyase [Zea mays] >gi|195622948|gb|ACG33304.1| lactoylglutathione lyase [Zea mays]	sp|Q8TAX7|MUC7_HUMAN	58.9	3e-08	Mucin-7 OS=Homo sapiens GN=MUC7 PE=1 SV=2	Cgl1939	50.4	3e-06	COG0532	Translation initiation factor 2 (IF-2; GTPase)	K13171	6e-07	52	vvi:100262120	serine/arginine repetitive matrix protein 1	-	GO:0003824//catalytic activity	-
Unigene25011_All	threonine degradation III	hydroxyacylglutathione hydrolase	714	18.0139	15.9547	-0.175129				gi|226492583|ref|NP_001149538.1|	234	1e-60	LOC100283164 [Zea mays] >gi|195627878|gb|ACG35769.1| hydroxyacylglutathione hydrolase 3 [Zea mays]	sp|Q9C8L4|GLO2O_ARATH	207	7e-53	Hydroxyacylglutathione hydrolase 3, mitochondrial OS=Arabidopsis thaliana GN=GLY3 PE=1 SV=3	slr1259	117	2e-26	COG0491	Zn-dependent hydrolases, including glyoxylases	K01069	4e-06	48.9	osa:4332736	hydroxyacylglutathione hydrolase [EC:3.1.2.6]	-	-	-
Unigene22750_All	threonine degradation III	lactoylglutathione lyase	1071	63.2414	60.7635	-0.0576643				gi|115463027|ref|NP_001055113.1|	358	9e-98	Os05g0295800 [Oryza sativa Japonica Group] >gi|113578664|dbj|BAF17027.1| Os05g0295800 [Oryza sativa Japonica Group]	sp|O49818|LGUL_CICAR	329	2e-89	Lactoylglutathione lyase OS=Cicer arietinum PE=2 SV=1	XF1399	154	2e-37	COG0346	Lactoylglutathione lyase and related lyases	K01759	6e-99	358	osa:4338324	lactoylglutathione lyase [EC:4.4.1.5]	GO:0044238//primary metabolic process;GO:0010038//response to metal ion	GO:0016846//carbon-sulfur lyase activity;GO:0005515//protein binding;GO:0043169//cation binding	GO:0009536//plastid
Unigene445_All	threonine degradation III	hydroxyacylglutathione hydrolase	760	10.5578	11.4809	0.120926				gi|115439055|ref|NP_001043807.1|	239	2e-62	Os01g0667200 [Oryza sativa Japonica Group] >gi|113533338|dbj|BAF05721.1| Os01g0667200 [Oryza sativa Japonica Group]	sp|Q9C8L4|GLO2O_ARATH	190	8e-48	Hydroxyacylglutathione hydrolase 3, mitochondrial OS=Arabidopsis thaliana GN=GLY3 PE=1 SV=3	alr3904	95.5	8e-20	COG0491	Zn-dependent hydrolases, including glyoxylases	--	--	--	--	--	-	GO:0016787//hydrolase activity	GO:0043231//intracellular membrane-bounded organelle
Unigene9790_All	threonine degradation III	hydroxyacylglutathione hydrolase	946	14.8435	17.038	0.198925				gi|115452831|ref|NP_001050016.1|	400	1e-110	Os03g0332400 [Oryza sativa Japonica Group] >gi|113548487|dbj|BAF11930.1| Os03g0332400 [Oryza sativa Japonica Group]	sp|O24496|GLO2C_ARATH	332	2e-90	Hydroxyacylglutathione hydrolase cytoplasmic OS=Arabidopsis thaliana GN=GLX2-2 PE=1 SV=2	all0580	158	1e-38	COG0491	Zn-dependent hydrolases, including glyoxylases	K01069	7e-112	400	osa:4332736	hydroxyacylglutathione hydrolase [EC:3.1.2.6]	GO:0006089//lactate metabolic process	GO:0046914//transition metal ion binding;GO:0016790//thiolester hydrolase activity	GO:0044464//cell part
Unigene46021_All	threonine degradation III	lactoylglutathione lyase	794	0.1486	1.0684	2.84595				gi|115462755|ref|NP_001054977.1|	351	7e-96	Os05g0230900 [Oryza sativa Japonica Group] >gi|113578528|dbj|BAF16891.1| Os05g0230900 [Oryza sativa Japonica Group]	sp|Q8W593|LGUC_ARATH	330	7e-90	Probable lactoylglutathione lyase, chloroplast OS=Arabidopsis thaliana GN=At1g67280 PE=2 SV=1	PM0987	147	2e-35	COG0346	Lactoylglutathione lyase and related lyases	--	--	--	--	--	-	-	-
